# Supplementary material for: Experimental and Theoretical DFT Investigations in the [2,3]-Wittig-Type Rearrangement of Propargyl/Allyl-Oxy-Pyrazolones
Source: MDPI journal article supplement (doi:10.3390/molecules26216557), 2021-10-29
Supplement: s1 [file s1]

# Experimental and Theoretical DFT Investigations in the [2,3]-Wittig-type Rearrangement of Propargyl/Allyl-oxy-Pyrazolones

Lucia De Crescentini,<sup>\*a</sup> Gianfranco Favi,<sup>a</sup> Giacomo Mari,<sup>a</sup> Gianluca Ciancaleoni,<sup>b</sup> Marcello Costamagna,<sup>b</sup> Stefania Santeusano,<sup>a</sup> and Fabio Mantellini<sup>\*a</sup>

<sup>a</sup>*Department of Biomolecular Sciences, Section of Organic Chemistry and Organic Natural Compounds, University of Urbino “Carlo Bo”, Via I Maggetti 24, 61029 Urbino (PU), Italy*

<sup>b</sup>*Department of Chemistry and Industrial Chemistry, University of Pisa, Via G.Moruzzi 13, 56124 Pisa (PI), Italy*

*e-mail: fabio.mantellini@uniurb.it, lucia.decrescentini@uniurb.it*

## SUPPORTING INFORMATION

### Table of Contents

|    |                                                                                                                                                                                                                                                                                                                                                                 |     |
|----|-----------------------------------------------------------------------------------------------------------------------------------------------------------------------------------------------------------------------------------------------------------------------------------------------------------------------------------------------------------------|-----|
| 1. | General remarks.                                                                                                                                                                                                                                                                                                                                                | 2   |
| 2. | Experimental procedures and spectral data                                                                                                                                                                                                                                                                                                                       | 3–8 |
|    | General procedure for the synthesis of 3-alkyl-4-hydroxy-1-aryl-4-(propa-1,2-dienyl)-1 <i>H</i> -pyrazol-5(4 <i>H</i> )-ones <b>4a–d</b> and of 9-alkyl-7-aryl-1-oxa-7,8-diazaspiro[4.4]nona-3,8-dien-6-ones <b>5d–g</b> , starting from 1,2-diaza-1,3-dienes <b>1d–g</b> and propargyl alcohol <b>2a</b> .                                                     | 3   |
|    | Characterization data of products <b>4a–d</b> and <b>5d–g</b> .                                                                                                                                                                                                                                                                                                 | 3   |
|    | General procedure for the synthesis of <i>tert</i> -butyl 2-(3-(allyloxy)-4-ethoxy-4-oxobutan-2-ylidene)hydrazinecarboxylate ( <b>3d</b> ) or <i>tert</i> -butyl 2-(3-(but-2-en-1-yloxy)-4-ethoxy-4-oxobutan-2-ylidene)hydrazinecarboxylate ( <b>3e</b> ), starting from 1,2-diaza-1,3-diene <b>1h</b> and allyl ( <b>2b</b> ) or crotyl ( <b>2c</b> ) alcohol. | 6   |
|    | Characterization data of products <b>3d,e</b> .                                                                                                                                                                                                                                                                                                                 | 6   |
|    | General procedure for the synthesis of 4-allyl-4-hydroxy-3-alkyl-1-aryl-1 <i>H</i> -pyrazol-5(4 <i>H</i> )-ones <b>6a–d</b> .                                                                                                                                                                                                                                   | 7   |
|    | General procedure for the synthesis of 4-allyl-4-hydroxy-3-methyl-1-alkoxycarbonyl-1 <i>H</i> -pyrazol-5(4 <i>H</i> )-one <b>6e</b> , starting from <b>3d</b> .                                                                                                                                                                                                 | 7   |
|    | Characterization data of products <b>6a–e</b> .                                                                                                                                                                                                                                                                                                                 | 7   |
| 3. | Table S1.                                                                                                                                                                                                                                                                                                                                                       | 9   |
| 4. | Table S2.                                                                                                                                                                                                                                                                                                                                                       | 10  |

|    |                                                                                                                    |       |
|----|--------------------------------------------------------------------------------------------------------------------|-------|
| 5. | $^1\text{H}$ and $^{13}\text{C}$ NMR spectra of products <b>4a–d</b> , <b>5d–g</b> , <b>3d,e</b> and <b>6a–d</b> . | 12–33 |
| 6. | DFT optimized geometries and energies                                                                              | 34–53 |
| 7. | References and notes.                                                                                              | 54    |

## 1. General Remarks

All chemicals and solvents were purchased from commercial suppliers and used as received. 1,2-Diaza-1,3-dienes were prepared as reported<sup>1</sup> and used as *EE/EZ* isomer mixtures. Melting points were determined in open capillary tubes and are uncorrected. FTIR spectra were obtained as Nujol mulls. All <sup>1</sup>H NMR and <sup>13</sup>C NMR spectra were recorded at 400 and 100 MHz, respectively. Proton and carbon spectra were referenced internally to solvent signals, using values of  $\delta = 7.27$  ppm for proton and  $\delta = 77.00$  ppm for carbon (middle peak) in CDCl<sub>3</sub>. All coupling constants (*J*) are given in Hz. All the NH and OH exchanged with D<sub>2</sub>O. Precoated silica gel plates 0.25 mm were employed for analytical thin layer chromatography. All new compounds showed satisfactory elemental analysis. Mass spectra were recorded in the ESI-MS mode. The nomenclature was generated using ACD/IUPAC Name (version 3.50, 5 Apr. 1998), Advanced Chemistry Development Inc., Toronto, ON (Canada).

## 2. Experimental procedures and spectral data

**General procedure for the synthesis of 3-alkyl-4-hydroxy-1-aryl-4-(propa-1,2-dienyl)-1*H*-pyrazol-5(4*H*)-ones 4a–d and of 9-alkyl-7-aryl-1-oxa-7,8-diazaspiro[4.4]nona-3,8-dien-6-ones 5d–g, starting from 1,2-diaza-1,3-dienes 1d–g and propargyl alcohol 2a.**

To a magnetically stirred mixture of 1,2-diaza-1,3-diene **1d–g** (1 mmol) and propargyl alcohol **2a** (3 mL) at 60 °C (oil bath), K<sub>2</sub>CO<sub>3</sub> (4 mmol) was added and the suspension was stand under these conditions for the appropriate time (8.0–11.5 hours), until the disappearance of the reagent **1** (TLC monitoring). The crude mixture was then purified by column chromatography on silica gel and then thin layer chromatography to afford 3-alkyl-4-hydroxy-1-aryl-4-(propa-1,2-dienyl)-1*H*-pyrazol-5(4*H*)-ones **4a–d** and 9-alkyl-7-aryl-1-oxa-7,8-diazaspiro[4.4]nona-3,8-dien-6-ones **5d–g**, that were oils (**4a,c** and **5d,f**) or solids (**4b,d** and **5e,g**) that were crystallized from EtOAc-light petroleum ether.

### Characterization data of products 4a–d and 5d–g.

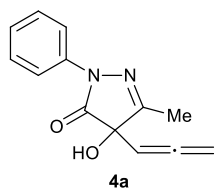

#### 4-Hydroxy-3-methyl-1-phenyl-4-(propa-1,2-dienyl)-1*H*-pyrazol-5(4*H*)-one

**(4a):** **4a** was isolated by column chromatography (acetate/cyclohexane 20:80) and then by thin layer chromatography (three elutions in acetate/cyclohexane 20:80 mixture) in 11% yield. Brown oil; <sup>1</sup>H NMR (400 MHz, CDCl<sub>3</sub>, 25 °C):  $\delta =$

2.21 (s, 3H), 4.09 (brs, 1H), 5.09 (d, *J* = 6.4, 2H), 5.40 (t, *J* = 6.4 Hz, 1H), 7.20 (t, *J* = 7.6, 1H<sub>ar</sub>), 7.40 (t, *J* = 7.2 Hz, 2H<sub>ar</sub>), 7.86 (d, *J* = 8.8 Hz, 2H<sub>ar</sub>); <sup>13</sup>C NMR (100 MHz, CDCl<sub>3</sub>, 25 °C):  $\delta =$  13.3 (q), 78.0 (s), 80.7 (t), 89.7 (d), 118.8 (d), 125.3 (d), 128.8 (d), 137.6 (s), 161.2 (s), 172.4 (s), 207.6

(s); IR (nujol):  $\nu_{\max}$  = 3302, 1953, 1719  $\text{cm}^{-1}$ ; MS  $m/z$  (ESI): 229.25 ( $M + H^+$ ); anal. calcd. for  $\text{C}_{13}\text{H}_{12}\text{N}_2\text{O}_2$  (228.25): C 68.41, H 5.30, N 12.27; found: C 68.58, H 5.35, N 12.18.

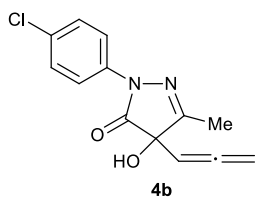

**1-(4-Chlorophenyl)-4-hydroxy-3-methyl-4-(propa-1,2-dienyl)-1H-**

**pyrazol-5(4H)-one (4b):** **4b** was isolated by column chromatography (acetate/cyclohexane 20:80) and then by thin layer chromatography (three

elutions in acetate/cyclohexane 20:80 mixture) in 10% yield. Brown solid; mp: 85–87 °C;  $^1\text{H}$  NMR (400 MHz,  $\text{CDCl}_3$ , 25 °C):  $\delta$  = 2.20 (s, 3H), 4.28–4.30 (m, 1H), 5.13 (d,  $J$  = 6.4 Hz, 2H), 5.36 (t,  $J$  = 6.4 Hz, 1H), 7.36 (d,  $J$  = 8.8 Hz,  $2\text{H}_{\text{ar}}$ ), 7.83 (d,  $J$  = 9.2 Hz,  $2\text{H}_{\text{ar}}$ );  $^{13}\text{C}$  NMR (100 MHz,  $\text{CDCl}_3$ , 25 °C):  $\delta$  = 13.3 (q), 77.6 (s), 81.3 (t), 89.6 (d), 119.8 (d), 128.9 (d), 130.4 (s), 136.2 (s), 160.9 (s), 171.8 (s), 207.6 (s); IR (nujol):  $\nu_{\max}$  = 3302, 1953, 1719  $\text{cm}^{-1}$ ; MS  $m/z$  (ESI): 261.22 ( $M - H^+$ ); anal. calcd. for  $\text{C}_{13}\text{H}_{11}\text{N}_2\text{O}_2\text{Cl}$  (262.69): C 59.44, H 4.22, N 10.66; found: C 59.21, H 4.28, N 10.60.

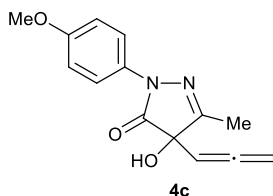

**4-Hydroxy-1-(4-methoxyphenyl)-3-methyl-4-(propa-1,2-dienyl)-1H-**

**pyrazol-5(4H)-one (4c):** **4c** was isolated by column chromatography (acetate/cyclohexane 20:80) and then by thin layer chromatography (three

elutions in acetate/cyclohexane 20:80 mixture) in 14% yield. Brown oil;  $^1\text{H}$  NMR (400 MHz,  $\text{CDCl}_3$ , 25 °C):  $\delta$  = 2.20 (s, 3H), 3.83 (s, 3H), 4.29 (d,  $J$  = 2.4 Hz, 1H), 5.15 (d,  $J$  = 6.8 Hz, 2H), 5.35 (t,  $J$  = 6.8 Hz, 1H), 6.94 (d,  $J$  = 9.2 Hz,  $2\text{H}_{\text{ar}}$ ), 7.74 (d,  $J$  = 9.2 Hz,  $2\text{H}_{\text{ar}}$ );  $^{13}\text{C}$  NMR (100 MHz,  $\text{CDCl}_3$ , 25 °C):  $\delta$  = 13.2 (q), 55.5 (q), 77.2 (s), 81.2 (t), 89.9 (d), 114.1 (d), 120.6 (d), 130.6 (s), 157.2 (s), 160.4 (s), 171.4 (s), 207.6 (s); IR (nujol):  $\nu_{\max}$  = 3242, 1956, 1712, 1678  $\text{cm}^{-1}$ ; MS  $m/z$  (ESI): 259.12 ( $M + H^+$ ); anal. calcd. for  $\text{C}_{14}\text{H}_{14}\text{N}_2\text{O}_3$  (258.27): C 65.11, H 5.46, N 10.85; found: C 65.22, H 5.40, N 10.90.

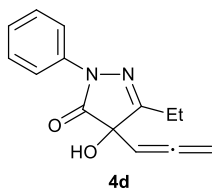

**3-Ethyl-4-hydroxy-1-phenyl-4-(propa-1,2-dienyl)-1H-pyrazol-5(4H)-one**

**(4d):** **4d** was isolated by column chromatography (acetate/cyclohexane 20:80) and then by thin layer chromatography (three elutions in acetate/cyclohexane 20:80 mixture) in 18% yield. Orange solid; mp: 101–103;  $^1\text{H}$  NMR (400 MHz,

$\text{CDCl}_3$ , 25 °C):  $\delta$  = 1.32 (t,  $J$  = 7.2 Hz, 3H), 2.55–2.66 (m, 2H), 4.27–4.29 (m, 1H), 5.11 (d,  $J$  = 6.8 Hz, 2H), 5.37 (t,  $J$  = 6.4 Hz, 1H), 7.21 (t,  $J$  = 7.2 Hz,  $2\text{H}_{\text{ar}}$ ), 7.41 (t,  $J$  = 7.6 Hz,  $2\text{H}_{\text{ar}}$ ), 7.89 (d,  $J$  = 8. Hz,  $1\text{H}_{\text{ar}}$ );  $^{13}\text{C}$  NMR (100 MHz,  $\text{CDCl}_3$ , 25 °C):  $\delta$  = 9.3 (q), 21.0 (t), 78.1 (s), 81.1 (t), 90.1 (d), 118.8 (d), 125.3 (d), 128.8 (d), 137.7 (s), 164.6 (s), 172.4 (s), 207.5 (s); IR (nujol):  $\nu_{\max}$  = 3279, 1956, 1691  $\text{cm}^{-1}$ ; MS  $m/z$  (ESI): 243.12 ( $M + H^+$ ); anal. calcd. for  $\text{C}_{14}\text{H}_{14}\text{N}_2\text{O}_2$  (242.27): C 69.41, H 5.82, N 11.56; found: C 69.32, H 5.89, N 11.65.

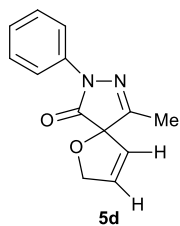

**9-Methyl-7-phenyl-1-oxa-7,8-diazaspiro[4.4]nona-3,8-dien-6-one (5d):** **5d** was isolated by column chromatography (acetate/cyclohexane 20:80) and then by thin layer chromatography (three elutions in acetate/cyclohexane 20:80 mixture) in 29% yield. Orange oil;  $^1\text{H}$  NMR (400 MHz,  $\text{CDCl}_3$ , 25 °C):  $\delta$  = 2.09 (s, 3H), 4.94–4.99 and 5.12–5.16 (2m, 2H), 5.62–5.65 (m, 1H), 6.46–6.48 (m, 1H), 7.19 (t,  $J$  = 7.6 Hz, 1H<sub>ar</sub>), 7.40 (t,  $J$  = 7.6 Hz, 2H<sub>ar</sub>), 7.89 (dd,  $J$  = 8.4 Hz,  $J$  = 1.2, 2H<sub>ar</sub>);  $^{13}\text{C}$  NMR (100 MHz,  $\text{CDCl}_3$ , 25 °C):  $\delta$  = 13.1 (q), 78.4 (t), 93.7 (s), 118.5 (d), 123.8 (d), 125.1 (d), 128.8 (d), 133.5 (d), 138.0 (s), 159.8 (s), 170.8 (s); IR (nujol):  $\nu_{\text{max}}$  = 3314, 3081, 1762, 1597  $\text{cm}^{-1}$  MS  $m/z$  (ESI): 227.20 ( $\text{M} - \text{H}^+$ ); anal. calcd. for  $\text{C}_{13}\text{H}_{12}\text{N}_2\text{O}_2$  (228.25): C 68.41, H 5.30, N 12.27; found: C 68.31, H 5.38, N 12.39.

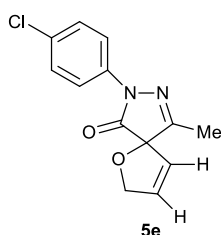

**7-(4-Chlorophenyl)-9-methyl-1-oxa-7,8-diazaspiro[4.4]nona-3,8-dien-6-one (5e):** **5e** was isolated by isolated by column chromatography (acetate/cyclohexane 20:80) and then by thin layer chromatography (three elutions in acetate/cyclohexane 20:80 mixture) in 17% yield. Orange solid; mp: 108–109 °C;  $^1\text{H}$  NMR (400 MHz,  $\text{CDCl}_3$ , 25 °C):  $\delta$  = 2.08 (s, 3H), 4.94–4.98 and 5.11–5.15 (2m, 2H), 5.62–5.64 (m, 1H), 6.47–6.49 (m, 1H), 7.36 (d,  $J$  = 9.2 Hz, 2H<sub>ar</sub>), 7.86 (d,  $J$  = 9.2 Hz, 2H<sub>ar</sub>);  $^{13}\text{C}$  NMR (100 MHz,  $\text{CDCl}_3$ , 25 °C):  $\delta$  = 13.1 (q), 78.4 (t), 93.6 (s), 119.6 (d), 123.6 (d), 128.9 (d), 130.1 (s), 133.7 (d), 136.6 (s), 160.1 (s), 170.7 (s); IR (nujol):  $\nu_{\text{max}}$  = 3278, 3093, 1722, 1595  $\text{cm}^{-1}$  MS  $m/z$  (ESI): 261.22 ( $\text{M} - \text{H}^+$ ); anal. calcd. for  $\text{C}_{13}\text{H}_{11}\text{N}_2\text{O}_2\text{Cl}$  (262.69): C 59.44, H 4.22, N 10.66; found: C 59.56, H 4.28, N 10.74.

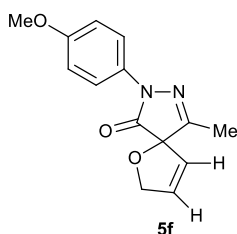

**7-(4-Methoxyphenyl)-9-methyl-1-oxa-7,8-diazaspiro[4.4]nona-3,8-dien-6-one (5f):** **5f** was isolated by isolated by column chromatography (acetate/cyclohexane 20:80) and then by thin layer chromatography (three elutions in acetate/cyclohexane 20:80 mixture) in 21% yield. Brown oil;  $^1\text{H}$  NMR (400 MHz,  $\text{CDCl}_3$ , 25 °C):  $\delta$  = 2.08 (s, 3H), 3.82 (s, 3H), 4.94–4.98 and 5.12–5.15 (2m, 2H), 5.62–5.65 (m, 1H), 6.46–6.48 (m, 1H), 6.93 (d,  $J$  = 9.2 Hz, 2H<sub>ar</sub>), 7.77 (d,  $J$  = 9.2 Hz, 2H<sub>ar</sub>);  $^{13}\text{C}$  NMR (100 MHz,  $\text{CDCl}_3$ , 25 °C):  $\delta$  = 13.1 (q), 55.5 (q), 78.4 (t), 93.6 (s), 114.0 (d), 120.4 (d), 123.8 (d), 131.4 (s), 133.4 (d), 157.0 (s), 159.7 (s), 170.4 (s); IR (nujol):  $\nu_{\text{max}}$  = 3279, 3086, 1731, 1717, 1610  $\text{cm}^{-1}$  MS  $m/z$  (ESI): 257.13 ( $\text{M} - \text{H}^+$ ); anal. calcd. for  $\text{C}_{14}\text{H}_{14}\text{N}_2\text{O}_3$  (258.27): C 65.11, H 5.46, N 10.85; found: C 64.99, H 5.54, N 10.76.

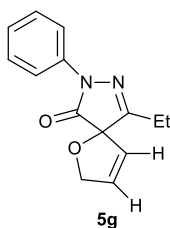

**9-Ethyl-7-phenyl-1-oxa-7,8-diazaspiro[4.4]nona-3,8-dien-6-one (5g):** **5g** was isolated by isolated by column chromatography (acetate/cyclohexane 20:80) and then by thin layer chromatography (three elutions in acetate/cyclohexane 20:80 mixture) in 18% yield. Yellow solid; mp: 121–123 °C;  $^1\text{H}$  NMR (400 MHz,  $\text{CDCl}_3$ , 25 °C):  $\delta$  = 1.27 (t,  $J$  = 7.2 Hz, 3H), 2.34–2.54 (m, 2H), 4.93–4.97 and 5.11–5.15

(2m, 2H), 5.63–5.66 (m, 1H), 6.44–6.46 (m, 1H), 7.19 (t,  $J = 7.6$  Hz, 1H<sub>ar</sub>), 7.41 (t,  $J = 7.6$  Hz, 2H<sub>ar</sub>), 7.92 (dd,  $J = 8.8$  Hz,  $J = 1.2$ , 2H<sub>ar</sub>);  $^{13}\text{C}$  NMR (100 MHz,  $\text{CDCl}_3$ , 25 °C):  $\delta = 9.7$  (q), 21.1 (t), 78.2 (t), 93.7 (s), 118.5 (d), 124.1 (d), 125.0 (d), 128.8 (d), 133.1 (d), 138.0 (s), 163.5 (s), 170.9 (s); IR (nujol):  $\nu_{\text{max}} = 3096, 1714, 1632, 1597\text{ cm}^{-1}$  MS  $m/z$  (ESI): 241.25 ( $\text{M} - \text{H}^+$ ); anal. calcd. for  $\text{C}_{14}\text{H}_{14}\text{N}_2\text{O}_2$  (242.27): C 69.41, H 5.82, N 11.56; found: C 69.31, H 5.77, N 11.62.

**General procedure for the synthesis of *tert*-butyl 2-(3-(allyloxy)-4-ethoxy-4-oxobutan-2-ylidene)hydrazinecarboxylate (3d) or *tert*-butyl 2-(3-(but-2-en-1-yloxy)-4-ethoxy-4-oxobutan-2-ylidene)hydrazinecarboxylate (3e), starting from 1,2-diaza-1,3-diene 1h and allyl (2b) or crotyl (2c) alcohol.**

To a magnetically stirred mixture of 1,2-diaza-1,3-diene (1 mmol) and allyl (2b) or crotyl (2c) alcohol (10 equiv.) at room temperature,  $\text{K}_2\text{CO}_3$  (1 mmol) was added and the suspension was stand under these conditions for 0.1 h, until the disappearance of the reagent 1 (TLC monitoring). The crude mixture was quickly filtered and then purified by column chromatography on silica gel to afford compounds 3d,e, that were crystallized from EtOAc.

**Characterization data of products 3d,e.**

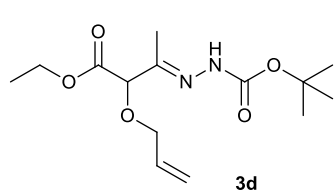

***Tert*-butyl**

**2-(3-(allyloxy)-4-ethoxy-4-oxobutan-2-**

**ylidene)hydrazinecarboxylate (3d):** 3d was isolated by column chromatography (acetate/cyclohexane 40:60) in 37% yield. White solid; mp: 119-120 °C;  $^1\text{H}$  NMR (400 MHz,  $\text{CDCl}_3$ , 25 °C):  $\delta = 1.27$  (t,  $J =$

7.2 Hz, 3H), 1.52 (s, 9H), 1.83 (s, 3H), 4.02–4.12 (m, 2H), 4.20–4.28 (m, 2H), 4.63 (s, 1H), 5.21 (d,  $J = 10.0$  Hz, 1H), 5.28–5.35 (m, 1H), 5.86–5.95 (m, 1H), 7.60 (s, 1H);  $^{13}\text{C}$  NMR (100 MHz,  $\text{CDCl}_3$ , 25 °C):  $\delta = 10.8$  (q), 14.1 (q), 28.2 (q), 61.4 (t), 70.8 (t), 81.6 (s), 81.8 (d), 118.2 (t), 133.5 (d), 146.8 (s), 152.3 (s), 169.1 (s); IR (nujol):  $\nu_{\text{max}} = 3235, 1760, 1725, 1704\text{ cm}^{-1}$ ; MS  $m/z$  (ESI): 303.22 ( $\text{M} + \text{H}^+$ ); anal. calcd. for  $\text{C}_{14}\text{H}_{24}\text{N}_2\text{O}_5$  (302.17): C 55.98, H 8.05, N 9.33; found: C 56.16, H 8.40, N 9.18.

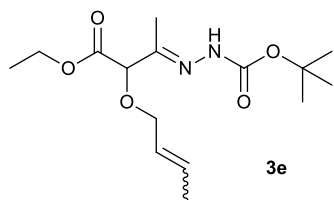

***Tert*-butyl**

**2-(3-(but-2-en-1-yloxy)-4-ethoxy-4-oxobutan-2-**

**ylidene)hydrazinecarboxylate (3e):** 3e was isolated by column chromatography (acetate/cyclohexane 40:60) in 22% yield. White solid; mp: 158-160 °C;  $^1\text{H}$  NMR (400 MHz,  $\text{CDCl}_3$ , 25 °C):  $\delta =$

1.27 (t,  $J = 7.2$  Hz, 3H), 1.52 (s, 9H), 1.71 (dd,  $J = 6.4$  Hz,  $J = 0.8$  Hz, 3H), 1.82 (s, 3H), 3.96–4.01 (m, 2H), 4.22 (q,  $J = 7.2$  Hz, 2H), 4.62 (s, 1H), 5.53–5.61 (m, 1H), 5.70–5.79 (m, 1H), 7.57 (s, 1H);  $^{13}\text{C}$  NMR (100 MHz,  $\text{CDCl}_3$ , 25 °C):  $\delta = 10.8$  (q), 14.2 (q), 17.8 (q), 28.2 (q), 61.4 (t), 70.6 (t), 81.4 (d), 81.5 (s), 126.3 (d), 131.1 (d), 146.9 (s), 152.2 (s), 169.3 (s); IR (nujol):  $\nu_{\text{max}} = 3372, 3269,$

1715, 1627  $\text{cm}^{-1}$ ; MS  $m/z$  (ESI): 313.09 ( $M - H^+$ ); anal. calcd. for  $\text{C}_{15}\text{H}_{26}\text{N}_2\text{O}_5$  (314.18): C 57.31, H 8.34, N 8.91; found: C 57.16, H 8.41, N 8.98.

**General procedure for the synthesis of 4-allyl-4-hydroxy-3-alkyl-1-aryl-1H-pyrazol-5(4H)-ones 6a–d, starting from 1,2-diaza-1,3-dienes 1g–j and allyl alcohol 2b.**

To a magnetically stirred mixture of 1,2-diaza-1,3-dienes **1g–j** (1 mmol) and allyl alcohol **2b** (3 mL) at 60 °C (oil bath),  $\text{K}_2\text{CO}_3$  (4 mmol) was added and the suspension was stand under these conditions for the appropriate time (8.0–16.0 hours), until the disappearance of the reagent **1** (TLC monitoring). The crude mixture was then purified by column chromatography on silica gel to afford 4-allyl-4-hydroxy-3-alkyl-1-aryl-1H-pyrazol-5(4H)-ones **6a–d** as oils, in the case of **6a,c,d** or solid that was crystallized from EtOAc-light petroleum ether in the case of **6b**.

**General procedure for the synthesis of 4-allyl-4-hydroxy-3-methyl-1-alcoxycarbonyl-1H-pyrazol-5(4H)-one 6e, starting from 3d.**

To a magnetically stirred solution of *tert*-butyl 2-(3-(allyloxy)-4-ethoxy-4-oxobutan-2-ylidene)hydrazinecarboxylate **3d** (1 mmol) in ethanol (3 mL),  $\text{K}_2\text{CO}_3$  (1 mmol) was added and the suspension was stand under these conditions for 2.0 hours, until the disappearance of the reagent **3** (TLC monitoring). The crude mixture was then filtered and purified by column chromatography on silica gel to afford **6e** as oil.

**Characterization data of products 6a–e.**

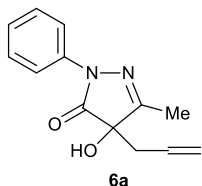

**4-Allyl-4-hydroxy-3-methyl-1-phenyl-1H-pyrazol-5(4H)-one (6a):** **6a** was isolated by column chromatography (acetate/cyclohexane 20:80) in 25% yield.

Brown oil;  $^1\text{H}$  NMR (400 MHz,  $\text{CDCl}_3$ , 25 °C):  $\delta$  = 2.18 (s, 3H), 2.59–2.73 (m, 2H), 3.90 (brs, 1H), 5.15–5.24 (m, 2H), 5.55–5.65 (m, 1H), 7.20 (t,  $J$  = 7.6 Hz, 1H<sub>ar</sub>), 7.39 (t,  $J$  = 8.8 Hz, 2H<sub>ar</sub>), 7.83 (d,  $J$  = 7.6 Hz, 2H<sub>ar</sub>);  $^{13}\text{C}$  NMR (100 MHz,  $\text{CDCl}_3$ , 25 °C):  $\delta$  = 13.2 (q), 40.6 (t), 79.6 (s), 118.9 (d), 121.4 (t), 125.4 (d), 128.5 (d), 128.8 (d), 137.4 (s), 161.5 (s), 173.4 (s); IR (nujol):  $\nu_{\text{max}}$  = 3263, 1683, 1596  $\text{cm}^{-1}$ ; MS  $m/z$  (ESI): 231.30 ( $M + H^+$ ); anal. calcd.

for  $\text{C}_{13}\text{H}_{14}\text{N}_2\text{O}_2$  (230.26): C 67.81, H 6.13, N 12.17; found: C 67.70, H 6.19, N 12.22.

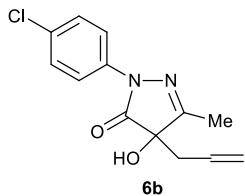

**4-Allyl-1-(4-chlorophenyl)-4-hydroxy-3-methyl-1H-pyrazol-5(4H)-one (6b):**

**6b** was isolated by column chromatography (acetate/cyclohexane 20:80) in 33% yield and crystallized from EtOAc-light petroleum ether. Yellow

solid; mp: 131–133 °C;  $^1\text{H}$  NMR (400 MHz,  $\text{CDCl}_3$ , 25 °C):  $\delta$  = 2.18 (s, 3H), 2.58–2.71 (m, 2H), 4.19 (brs, 1H), 5.15–5.24 (m, 2H), 5.52–5.62 (m, 1H), 7.33 (d,  $J$  = 8.8 Hz, 2H<sub>ar</sub>), 7.79 (d,  $J$  = 8.8 Hz, 2H<sub>ar</sub>);  $^{13}\text{C}$  NMR (100 MHz,  $\text{CDCl}_3$ , 25 °C):  $\delta$  = 13.2 (q), 40.5 (t), 79.6 (s), 119.9 (d), 121.5 (t), 128.3 (d), 128.9 (d), 130.5 (s), 135.9 (s), 161.9 (s), 173.5 (s); IR (nujol):  $\nu_{\text{max}}$  = 3302, 1685, 1625

cm<sup>-1</sup>; MS *m/z* (ESI): 265.09 (*M* + *H*<sup>+</sup>); anal. calcd. for C<sub>13</sub>H<sub>13</sub>N<sub>2</sub>O<sub>2</sub>Cl (264.71): C 58.99, H 4.95, N 10.58; found: C 59.11, H 4.89, N 10.66.

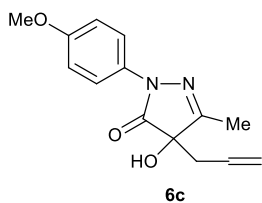

**4-Allyl-4-hydroxy-1-(4-methoxyphenyl)-3-methyl-1*H*-pyrazol-5(4*H*)-one**

**(6c):** **6c** was isolated by column chromatography (acetate/cyclohexane 20:80) in 33% yield. Brown oil; <sup>1</sup>H NMR (400 MHz, CDCl<sub>3</sub>, 25 °C): δ = 2.17 (s, 3H), 2.60–2.64 (m, 2H), 3.82 (s, 3H), 4.10 (brs, 1H), 5.20–5.27 (m, 2H),

5.60–5.69 (m, 1H), 6.93 (d, *J* = 9.2 Hz, 2H<sub>ar</sub>), 7.72 (d, *J* = 9.2 Hz, 2H<sub>ar</sub>); <sup>13</sup>C NMR (100 MHz, CDCl<sub>3</sub>, 25 °C): δ = 13.3 (q), 40.7 (t), 55.5 (q), 79.0 (s), 114.0 (d), 120.7 (d), 121.5 (t), 128.5 (d), 130.8 (s), 157.2 (s), 160.8 (s), 172.5 (s); IR (nujol): ν<sub>max</sub> = 3357, 1693, 1608 cm<sup>-1</sup>; MS *m/z* (ESI): 259.23 (*M* - *H*<sup>+</sup>); anal. calcd. for C<sub>14</sub>H<sub>16</sub>N<sub>2</sub>O<sub>3</sub> (260.29): C 64.60, H 6.20, N 10.76; found: C 64.51, H 6.24, N 10.67.

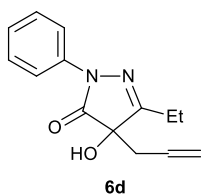

**4-Allyl-3-ethyl-4-hydroxy-1-phenyl-1*H*-pyrazol-5(4*H*)-one (6d):** **6d** was

isolated by column chromatography (acetate/cyclohexane 20:80) in 28% yield. Red oil; <sup>1</sup>H NMR (400 MHz, CDCl<sub>3</sub>, 25 °C): δ = 1.32 (t, *J* = 7.2 Hz, 3H), 2.44–2.70 (m, 4H), 3.65 (brs, 1H), 5.16–5.25 (m, 2H), 5.56–5.66 (m, 1H), 7.20 (t,

*J* = 7.2 Hz, 1H<sub>ar</sub>), 7.40 (t, *J* = 8.4 Hz, 2H<sub>ar</sub>), 7.87 (dd, *J* = 8.8 Hz, *J* = 1.2, 2H<sub>ar</sub>); <sup>13</sup>C NMR (100 MHz, CDCl<sub>3</sub>, 25 °C): δ = 9.1 (q), 21.0 (t), 40.9 (t), 79.7 (s), 118.8 (d), 121.4 (t), 125.2 (d), 128.6 (d), 128.8 (d), 137.6 (s), 164.9 (s), 173.5 (s); IR (nujol): ν<sub>max</sub> = 3313, 1689, 1625, 1597 cm<sup>-1</sup>; MS *m/z* (%):MS *m/z* (ESI): 245.14 (*M* + *H*<sup>+</sup>); anal. calcd. for C<sub>14</sub>H<sub>16</sub>N<sub>2</sub>O<sub>2</sub> (244.29): C 67.83, H 6.60, N 11.47; found: C 67.71, H 6.65, N 11.54.

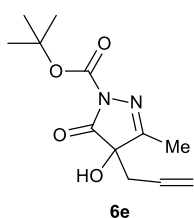

**Tert-butyl 4-allyl-4-hydroxy-3-methyl-5-oxo-4,5-dihydro-1*H*-pyrazole-1-carboxylate (6e):** **6e** was isolated by column chromatography

(acetate/cyclohexane 20:80) in 70% yield. Pale yellow oil; <sup>1</sup>H NMR (400 MHz, CDCl<sub>3</sub>, 25 °C): δ = 1.59 (s, 9H), 2.13 (s, 3H), 2.55 (d, *J* = 7.2 Hz, 2H), 3.10 (brs, 1H), 5.20–5.30 (m, 2H), 5.61–5.71 (m, 1H); <sup>13</sup>C NMR (100 MHz, CDCl<sub>3</sub>, 25 °C):

δ = 13.4 (q), 28.0 (q), 40.3 (t), 78.1 (s), 84.9 (s), 122.2 (t), 127.9 (d), 147.5 (s), 161.5 (s), 173.2 (s); IR (nujol): ν<sub>max</sub> = 3268, 1678, 1619 cm<sup>-1</sup>; MS *m/z* (ESI): 253.22 (*M* - *H*<sup>+</sup>); anal. calcd. for C<sub>12</sub>H<sub>18</sub>N<sub>2</sub>O<sub>4</sub> (254.28): C 56.68, H 7.13, N 11.02; found: C 56.84, H 7.02, N 10.86.



### 3. Table S1.

**Table S1** Screening of different conditions tested in the reaction between DDs **1d–g** and crotyl alcohol **2c**.<sup>a</sup>

| entry | Solvent                         | Catalyst                       | Equivalents | T     | Trend of the reaction            |
|-------|---------------------------------|--------------------------------|-------------|-------|----------------------------------|
| 1     | CH <sub>2</sub> Cl <sub>2</sub> | DBU                            | 0.1         | rt    | no reaction                      |
| 2     | CH <sub>2</sub> Cl <sub>2</sub> | DBU                            | 0.5         | rt    | no reaction                      |
| 3     | CH <sub>2</sub> Cl <sub>2</sub> | DBU                            | 0.5         | 60 °C | complicated mixture              |
| 4     | CH <sub>2</sub> Cl <sub>2</sub> | DBU                            | 1           | rt    | complicated mixture              |
| 5     | MeCN                            | DBU                            | 0.1         | rt    | no reaction                      |
| 6     | Me CN                           | DBU                            | 0.1         | 60 °C | complicated mixture              |
| 7     | MeCN                            | DBU                            | 1           | rt    | complicated mixture              |
| 8     | THF                             | DBU                            | 0.1         | rt    | no reaction                      |
| 9     | THF                             | DBU                            | 0.1         | 60 °C | complicated mixture              |
| 10    | THF                             | DBU                            | 1           | rt    | complicated mixture              |
| 11    | MeOH                            | DBU                            | 0.1         | rt    | no reaction                      |
| 12    | MeOH                            | DBU                            | 0.5         | rt    | no reaction                      |
| 13    | MeOH                            | DBU                            | 0.5         | 60 °C | complicated mixture              |
| 14    | MeOH                            | DBU                            | 1           | rt    | complicated mixture              |
| 15    | <b>2c</b> as s/r <sup>b</sup>   | DBU                            | 1           | rt    | complicated mixture <sup>c</sup> |
| 16    | MeCN                            | DIPEA                          | 2           | rt    | no reaction                      |
| 17    | MeCN                            | DIPEA                          | 4           | rt    | no reaction                      |
| 18    | THF                             | DIPEA                          | 4           | rt    | no reaction                      |
| 19    | CH <sub>2</sub> Cl <sub>2</sub> | DIPEA                          | 4           | rt    | no reaction                      |
| 20    | <b>2c</b> as s/r <sup>b</sup>   | DIPEA                          | 4           | rt    | no reaction                      |
| 21    | <b>2c</b> as s/r <sup>b</sup>   | DIPEA                          | 4           | 60 °C | no reaction                      |
| 22    | MeCN                            | NaH                            | 0.1         | rt    | complicated mixture              |
| 23    | THF                             | NaH                            | 0.1         | rt    | complicated mixture              |
| 24    | CH <sub>2</sub> Cl <sub>2</sub> | NaH                            | 0.1         | rt    | complicated mixture              |
| 25    | <b>2c</b> as s/r <sup>b</sup>   | NaH                            | 0.1         | rt    | complicated mixture              |
| 26    | MeCN                            | MeONa                          | 0.1         | rt    | complicated mixture              |
| 27    | THF                             | MeONa                          | 0.1         | rt    | complicated mixture              |
| 28    | CH <sub>2</sub> Cl <sub>2</sub> | MeONa                          | 0.1         | rt    | complicated mixture              |
| 29    | <b>2c</b> as s/r <sup>b</sup>   | MeONa                          | 0.1         | rt    | complicated mixture              |
| 30    | MeCN                            | K <sub>2</sub> CO <sub>3</sub> | 4           | rt    | no reaction                      |
| 31    | THF                             | K <sub>2</sub> CO <sub>3</sub> | 4           | rt    | no reaction                      |
| 32    | CH <sub>2</sub> Cl <sub>2</sub> | K <sub>2</sub> CO <sub>3</sub> | 4           | rt    | no reaction                      |
| 33    | <b>2c</b> as s/r <sup>b</sup>   | K <sub>2</sub> CO <sub>3</sub> | 4           | rt    | no reaction                      |
| 34    | <b>2c</b> as s/r <sup>b</sup>   | K <sub>2</sub> CO <sub>3</sub> | 4           | 60 °C | complicated mixture              |

<sup>a</sup>The reactions were performed at 0.5 mmol scale of DDs **1** in 3 mL of solvent,. 1.2. equiv. of **2c** was used. <sup>b</sup>**2c** was employed as solvent/reagent (3 mL).

#### 4. Table S2.

**Table S2** Screening of different conditions tested to tentatively convert **3e** into the corresponding pyrazol-5(4*H*)-one.<sup>a</sup>

| entry | Solvent                         | Catalyst             | Equivalents | T     | Trend of the reaction |
|-------|---------------------------------|----------------------|-------------|-------|-----------------------|
| 1     | CH <sub>2</sub> Cl <sub>2</sub> | DBU                  | 1           | rt    | no reaction           |
| 2     | CH <sub>2</sub> Cl <sub>2</sub> | DBU                  | 1           | 60 °C | no reaction           |
| 3     | CHCl <sub>3</sub>               | DBU                  | 1           | rt    | no reaction           |
| 4     | CHCl <sub>3</sub>               | DBU                  | 1           | 60 °C | no reaction           |
| 5     | CHCl <sub>3</sub>               | DBU                  | 2           | 60 °C | no reaction           |
| 6     | MeCN                            | DBU                  | 1           | rt    | no reaction           |
| 7     | Me CN                           | DBU                  | 1           | 60 °C | no reaction           |
| 8     | MeCN                            | DBU                  | 3           | rt    | complicated mixture   |
| 9     | THF                             | DBU                  | 0.1         | rt    | no reaction           |
| 10    | THF                             | DBU                  | 0.1         | 60 °C | no reaction           |
| 11    | THF                             | DBU                  | 1           | rt    | no reaction           |
| 12    | THF                             | DBU                  | 1           | 60 °C | no reaction           |
| 13    | THF                             | DBU                  | 4           | rt    | complicated mixture   |
| 14    | MeOH                            | DBU                  | 0.1         | rt    | no reaction           |
| 15    | MeOH                            | DBU                  | 0.5         | rt    | no reaction           |
| 16    | MeOH                            | DBU                  | 1           | rt    | no reaction           |
| 17    | MeOH                            | DBU                  | 1           | 60 °C | complicated mixture   |
| 18    | CHCl <sub>3</sub>               | Zn(OTf) <sub>3</sub> | 0.2         | rt    | no reaction           |
| 19    | CHCl <sub>3</sub>               | Zn(OTf) <sub>3</sub> | 1           | rt    | no reaction           |
| 20    | CHCl <sub>3</sub>               | Zn(OTf) <sub>3</sub> | 1           | rt    | no reaction           |
| 21    | MeCN                            | NaH                  | 0.1         | rt    | no reaction           |
| 22    | MeCN                            | NaH                  | 0.1         | 60 °C | complicated mixture   |
| 23    | MeCN                            | NaH                  | 1           | rt    | complicated mixture   |
| 24    | THF                             | NaH                  | 0.1         | rt    | no reaction           |
| 25    | THF                             | NaH                  | 0.1         | 60 °C | complicated mixture   |
| 26    | THF                             | NaH                  | 1           | rt    | complicated mixture   |
| 27    | CH <sub>2</sub> Cl <sub>2</sub> | NaH                  | 0.1         | rt    | no reaction           |
| 28    | CH <sub>2</sub> Cl <sub>2</sub> | NaH                  | 0.1         | 60 °C | complicated mixture   |
| 29    | CH <sub>2</sub> Cl <sub>2</sub> | NaH                  | 1           | rt    | complicated mixture   |
| 30    | MeOH                            | NaH                  | 0.1         | rt    | complicated mixture   |
| 31    | MeCN                            | MeONa                | 0.1         | rt    | no reaction           |
| 32    | MeCN                            | MeONa                | 0.1         | 60 °C | complicated mixture   |
| 33    | MeCN                            | MeONa                | 1           | rt    | complicated mixture   |
| 34    | THF                             | MeONa                | 0.1         | rt    | no reaction           |
| 35    | THF                             | MeONa                | 0.1         | 60 °C | complicated mixture   |
| 36    | THF                             | MeONa                | 1           | 60 °C | complicated mixture   |
| 37    | CH <sub>2</sub> Cl <sub>2</sub> | MeONa                | 1           | rt    | no reaction           |

|    |                                 |                                |   |        |                     |
|----|---------------------------------|--------------------------------|---|--------|---------------------|
| 38 | CH <sub>2</sub> Cl <sub>2</sub> | MeONa                          | 1 | 60 °C  | complicated mixture |
| 39 | MeCN                            | K <sub>2</sub> CO <sub>3</sub> | 4 | rt     | no reaction         |
| 40 | THF                             | K <sub>2</sub> CO <sub>3</sub> | 4 | rt     | no reaction         |
| 41 | CH <sub>2</sub> Cl <sub>2</sub> | K <sub>2</sub> CO <sub>3</sub> | 4 | rt     | no reaction         |
| 42 | MeOH                            | K <sub>2</sub> CO <sub>3</sub> | 4 | rt     | no reaction         |
| 43 | EtOH                            | K <sub>2</sub> CO <sub>3</sub> | 1 | rt     | no reaction         |
| 44 | EtOH                            | K <sub>2</sub> CO <sub>3</sub> | 4 | rt     | no reaction         |
| 45 | EtOH                            | K <sub>2</sub> CO <sub>3</sub> | 4 | reflux | no reaction         |

---

<sup>a</sup>The reactions were performed at 0.5 mmol scale of **3e** in 3 mL of solvent.

5.  $^1\text{H}$  and  $^{13}\text{C}$  NMR spectra of products.

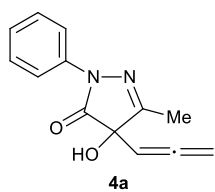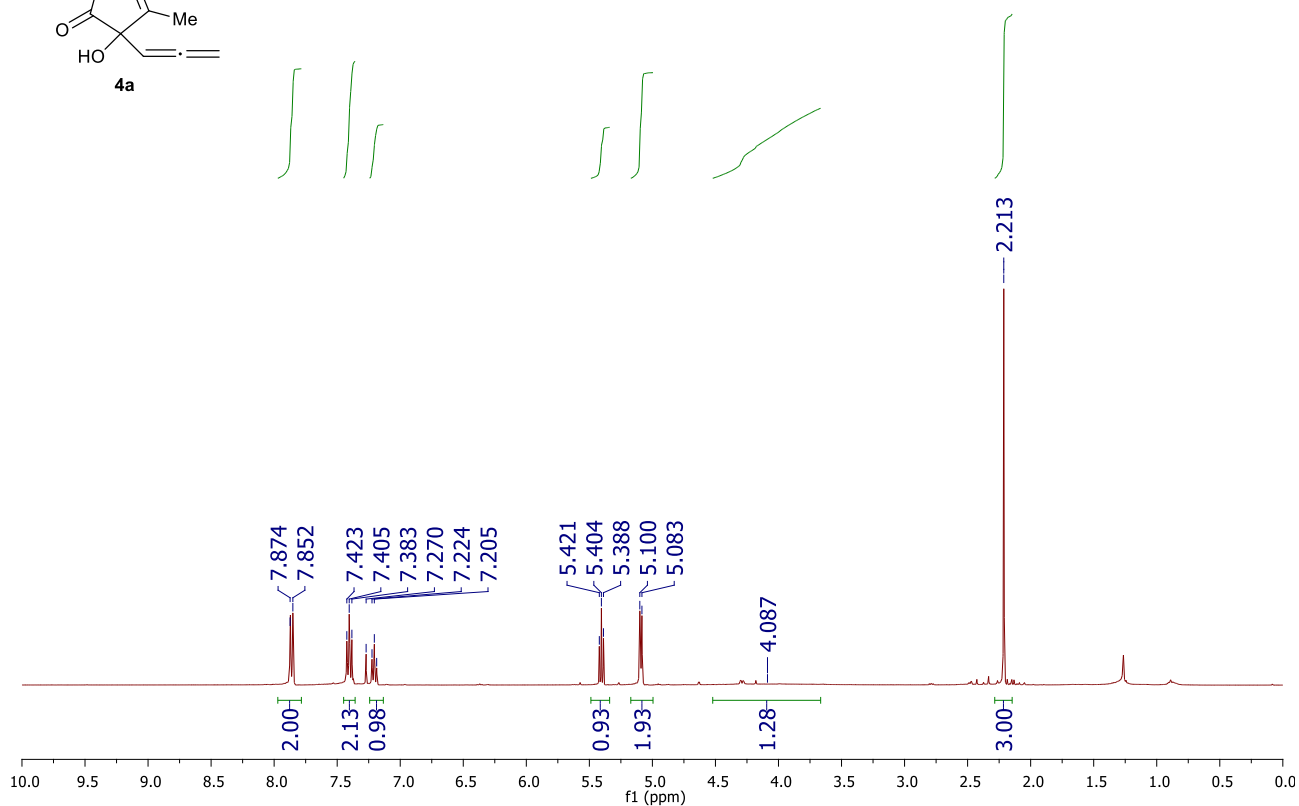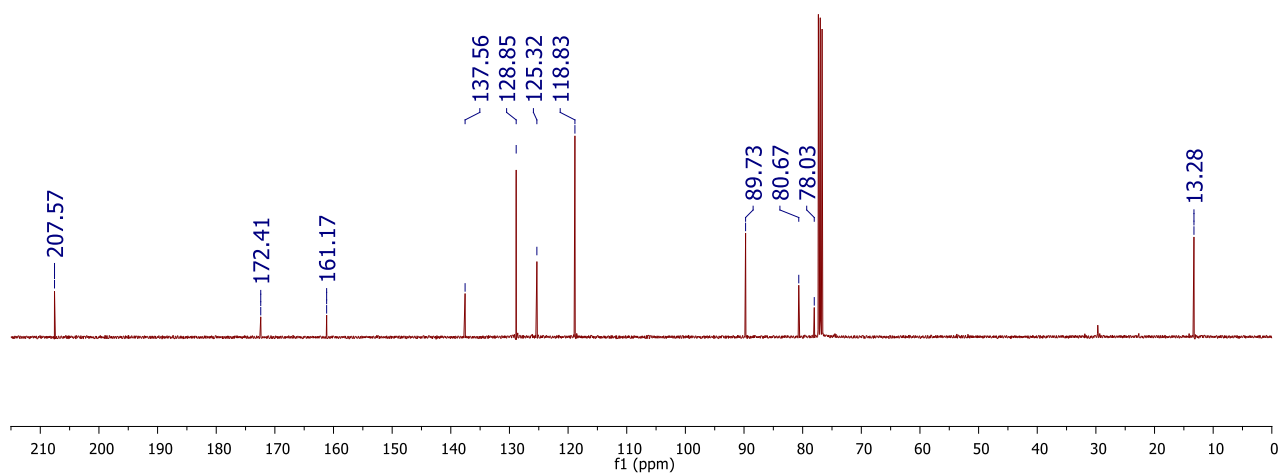

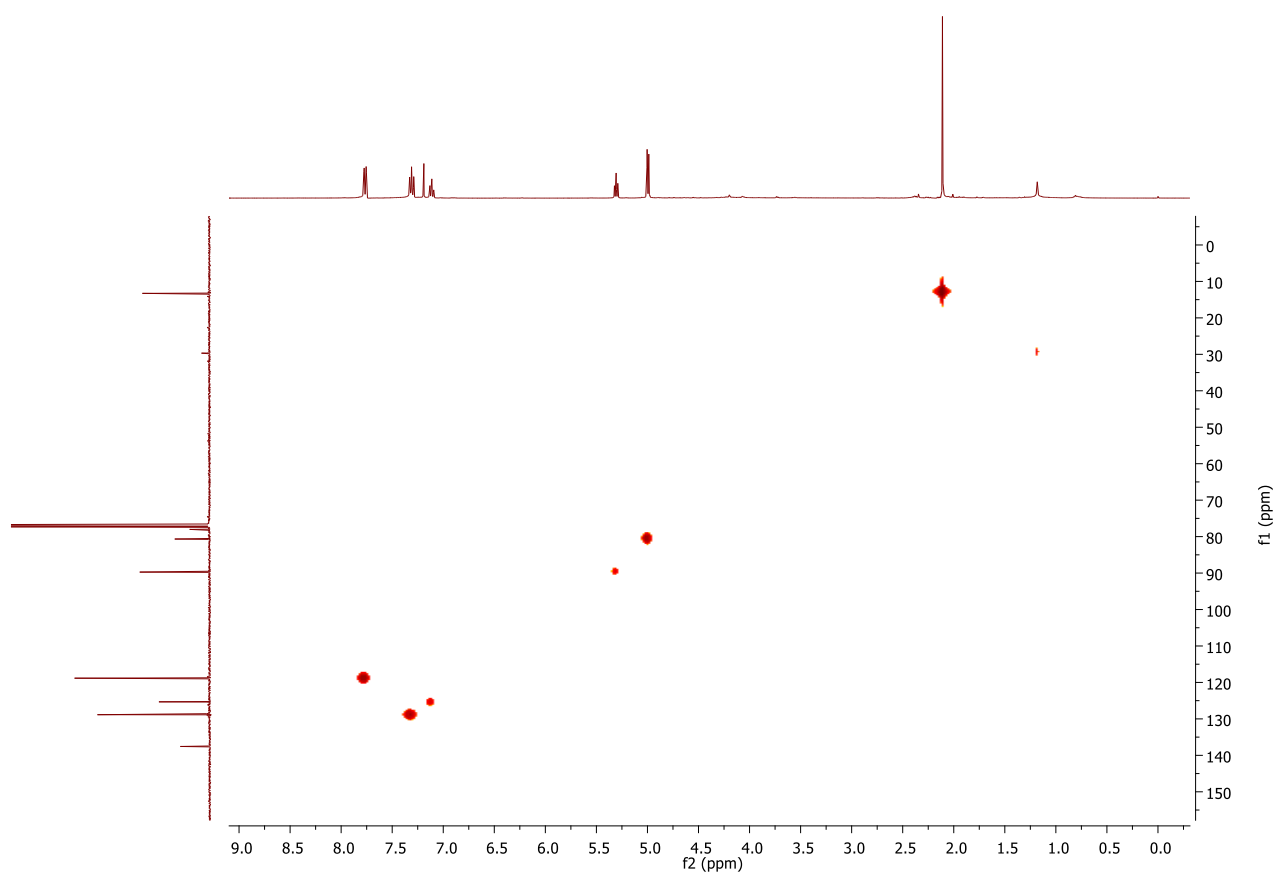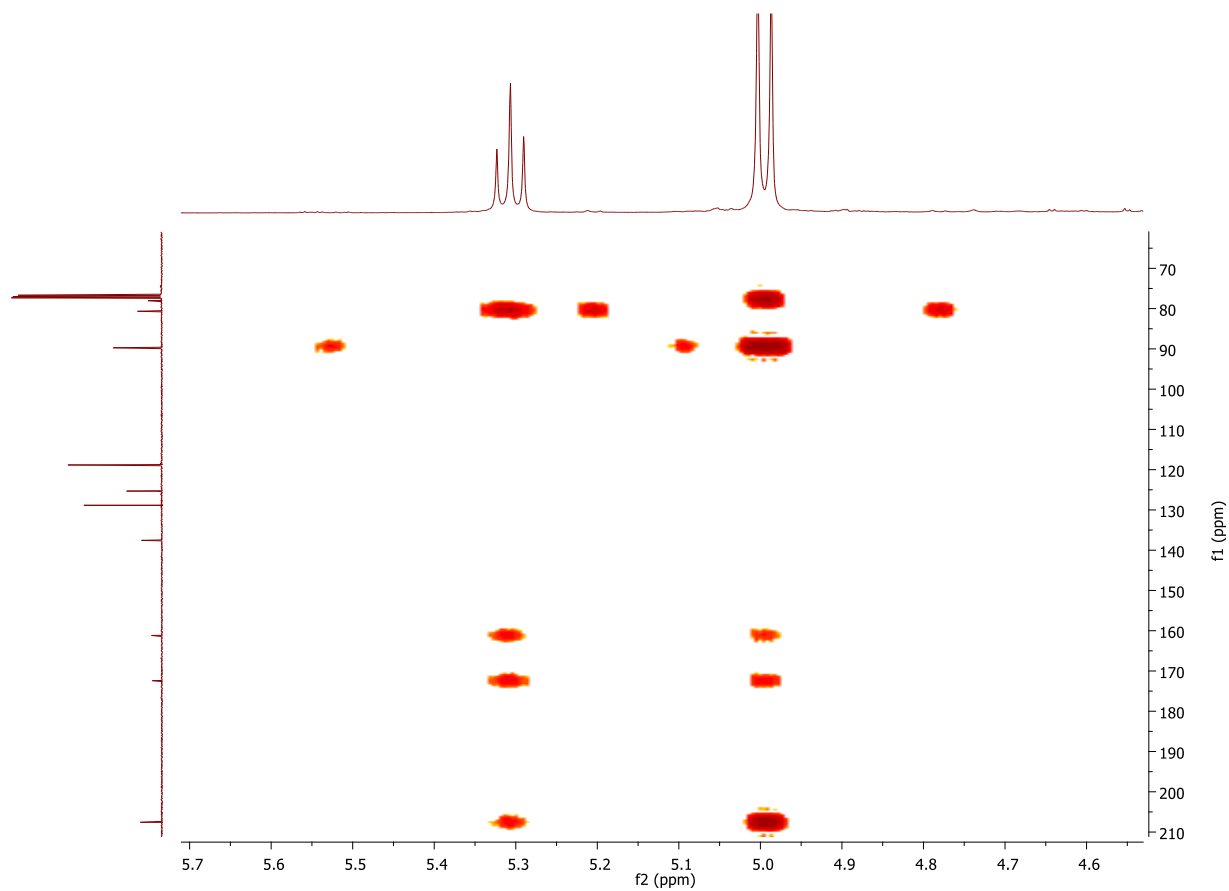

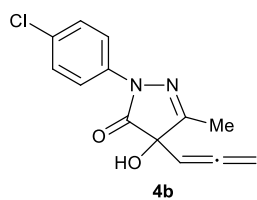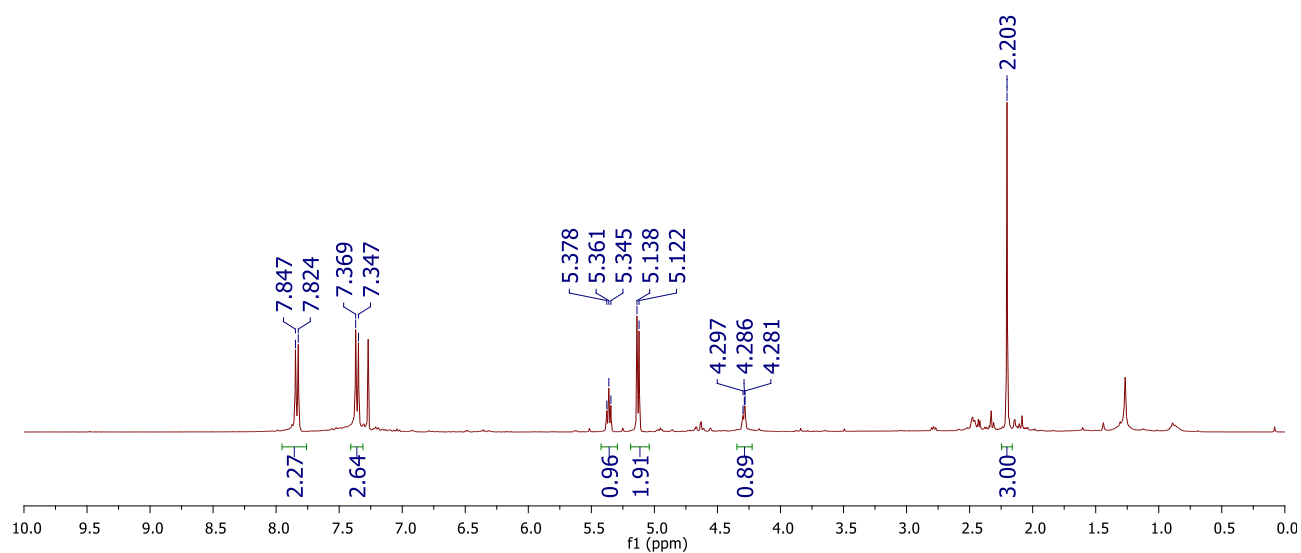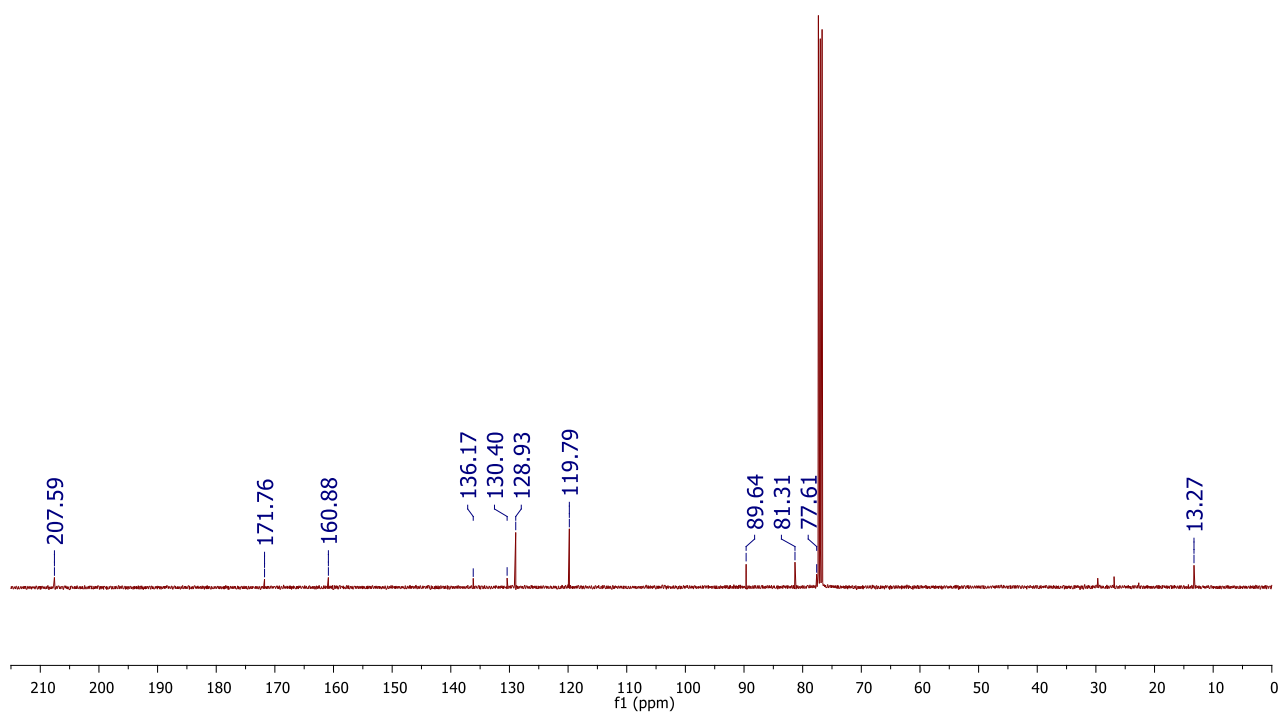

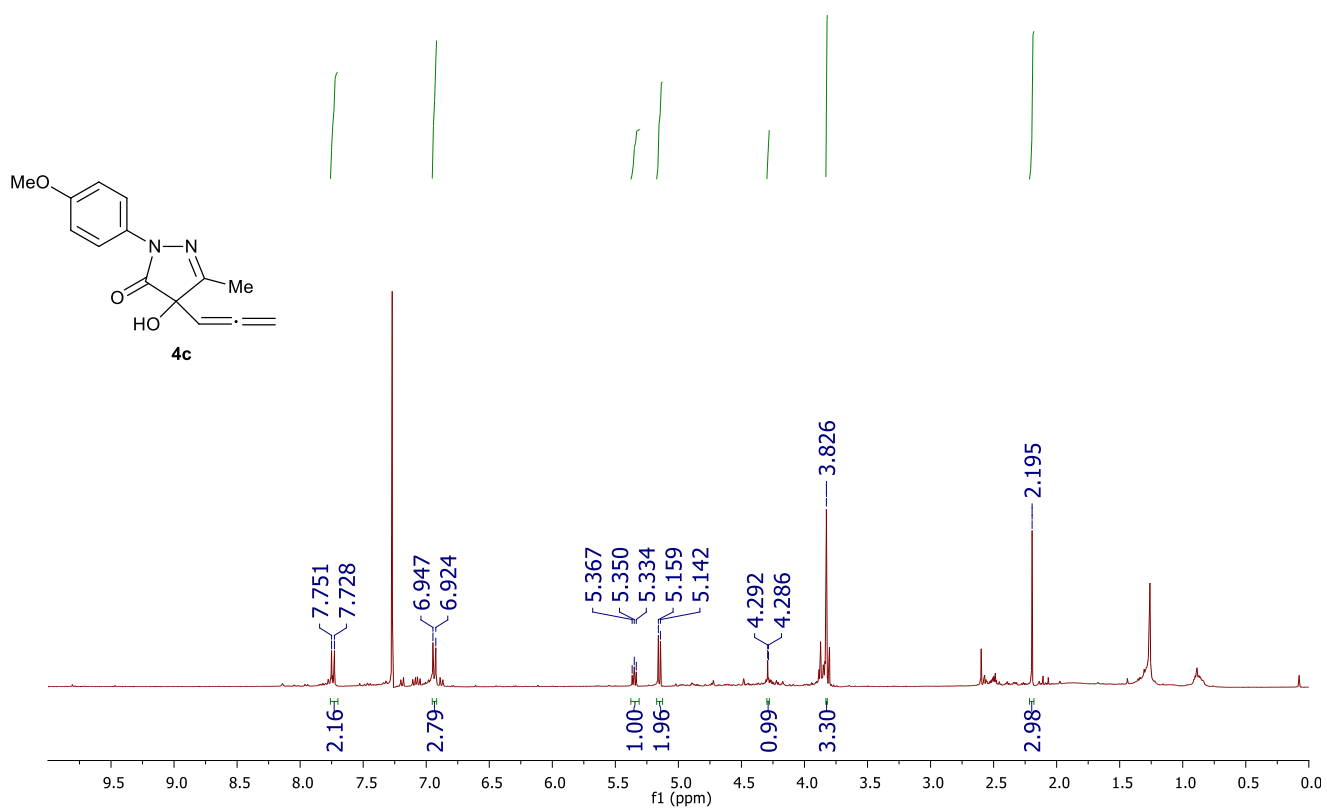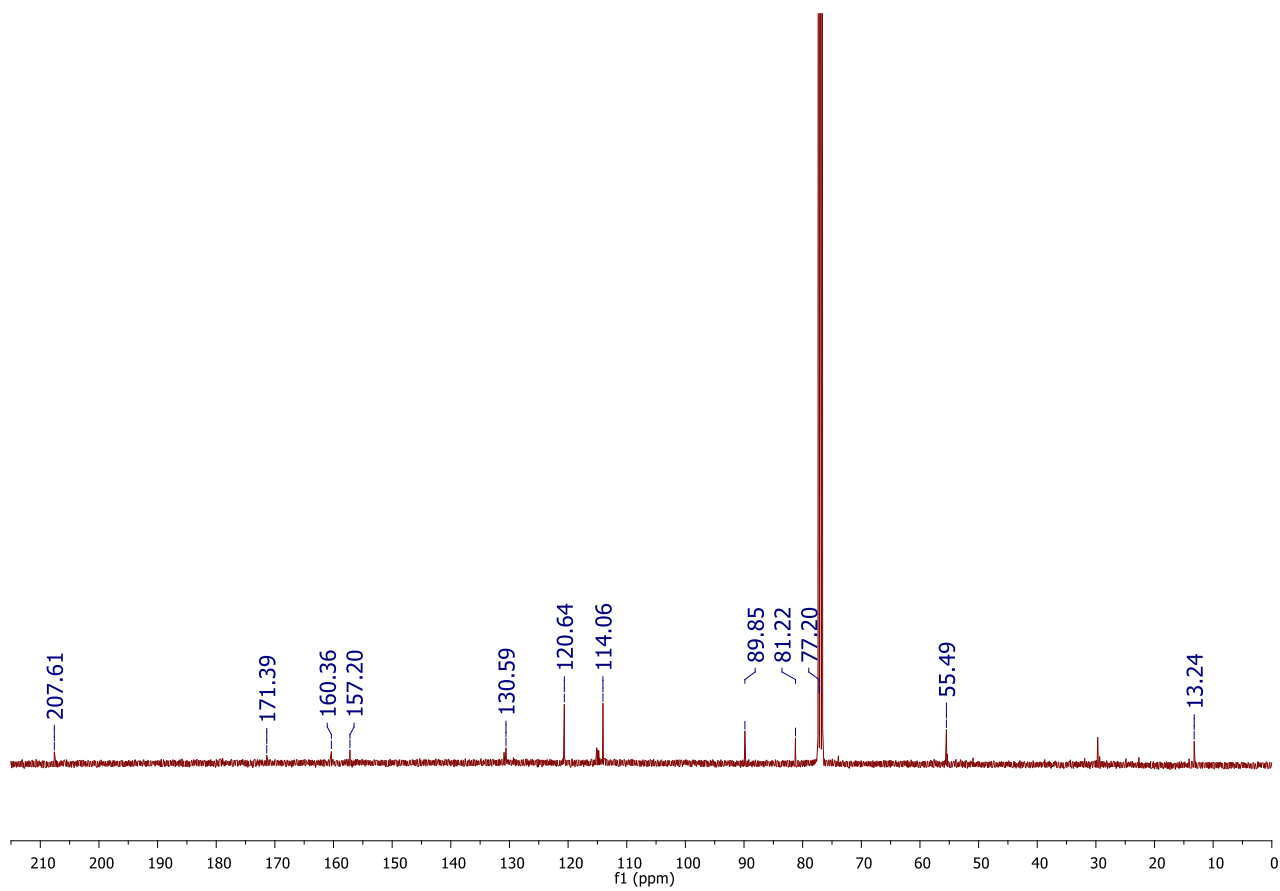

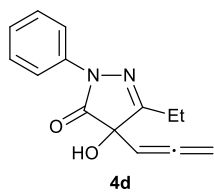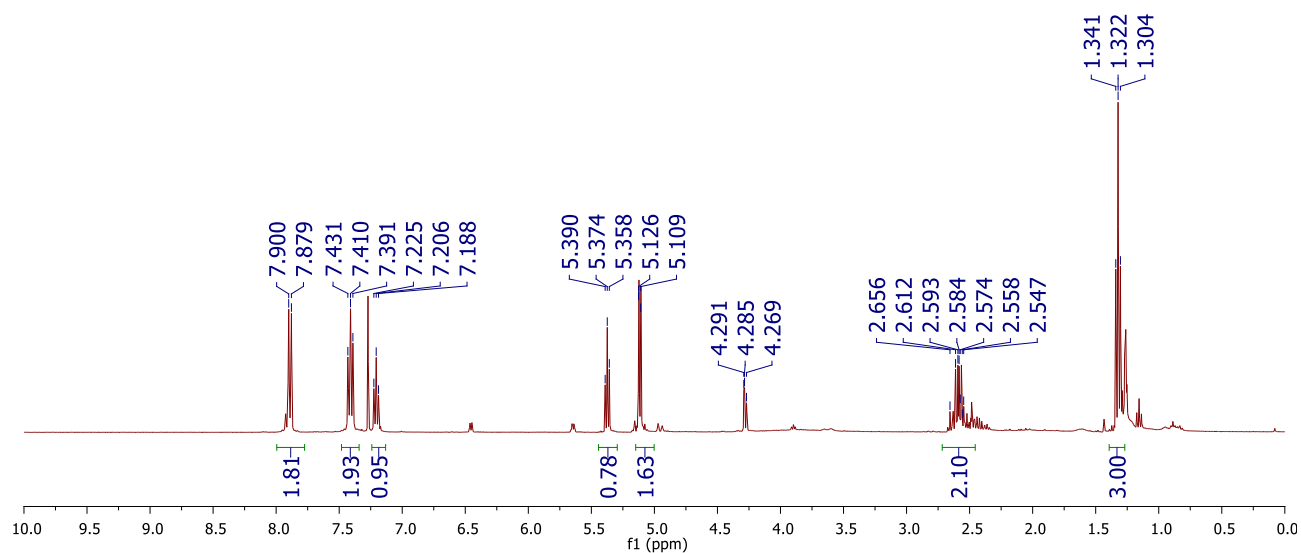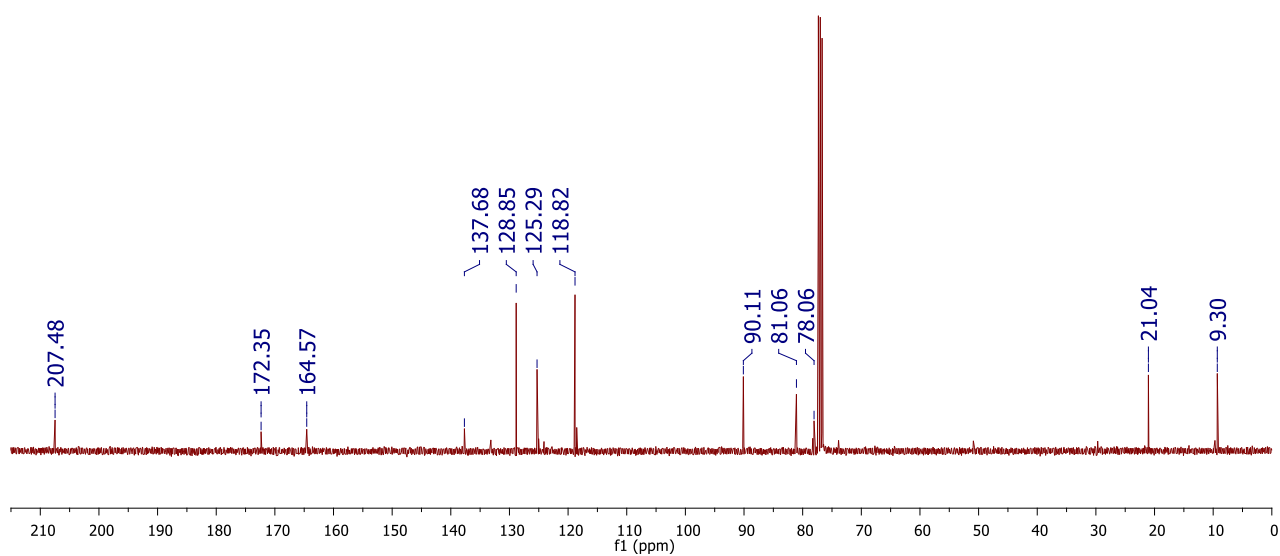



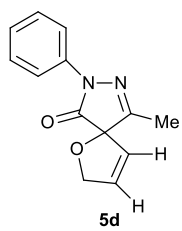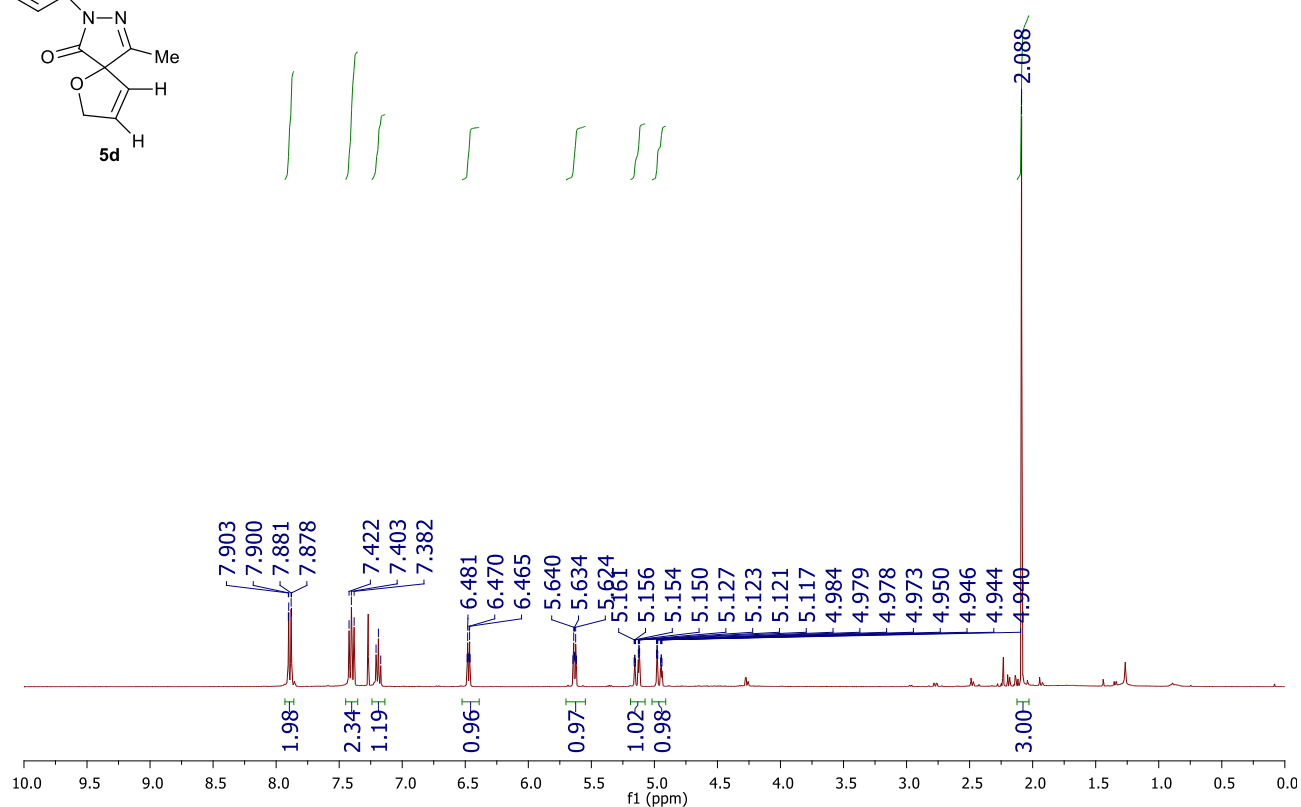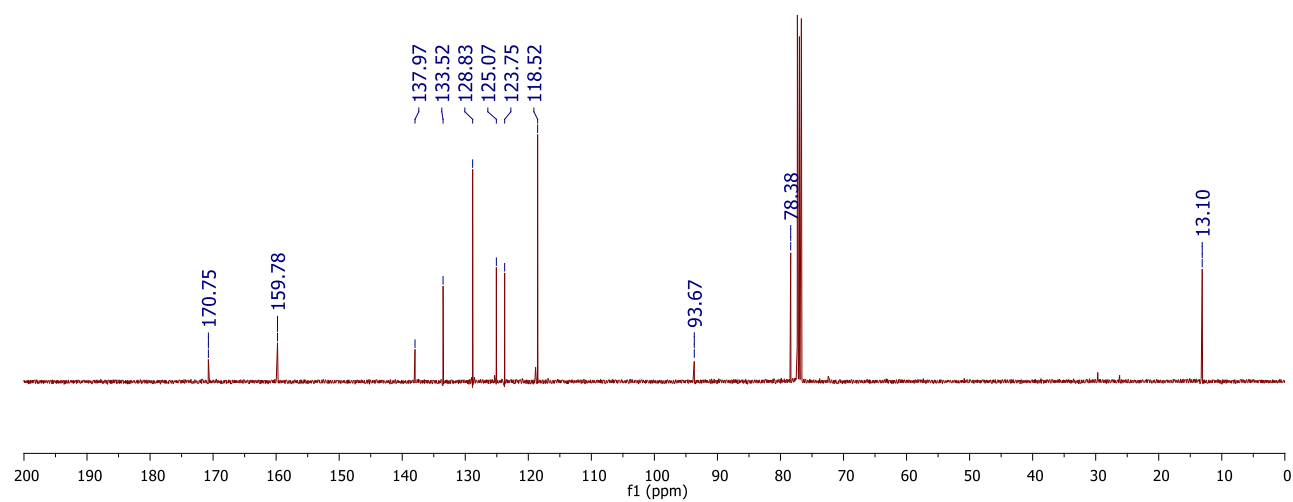

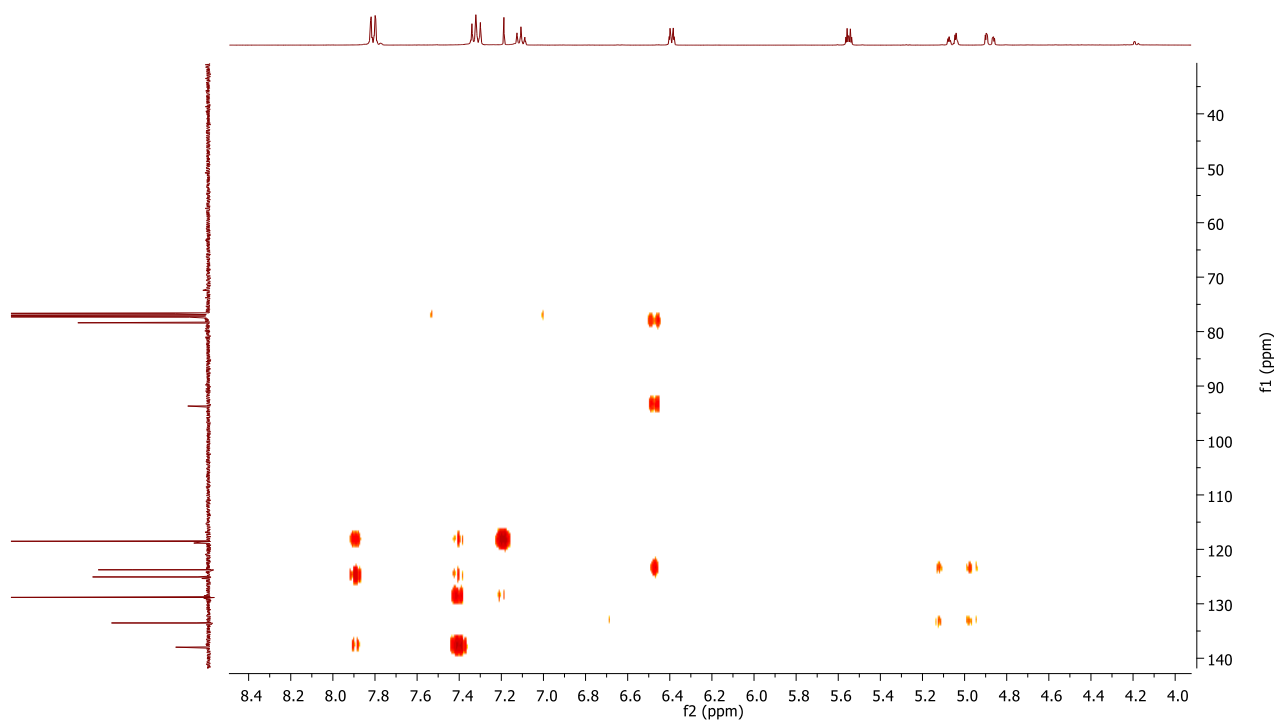

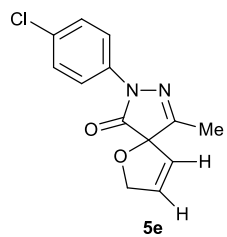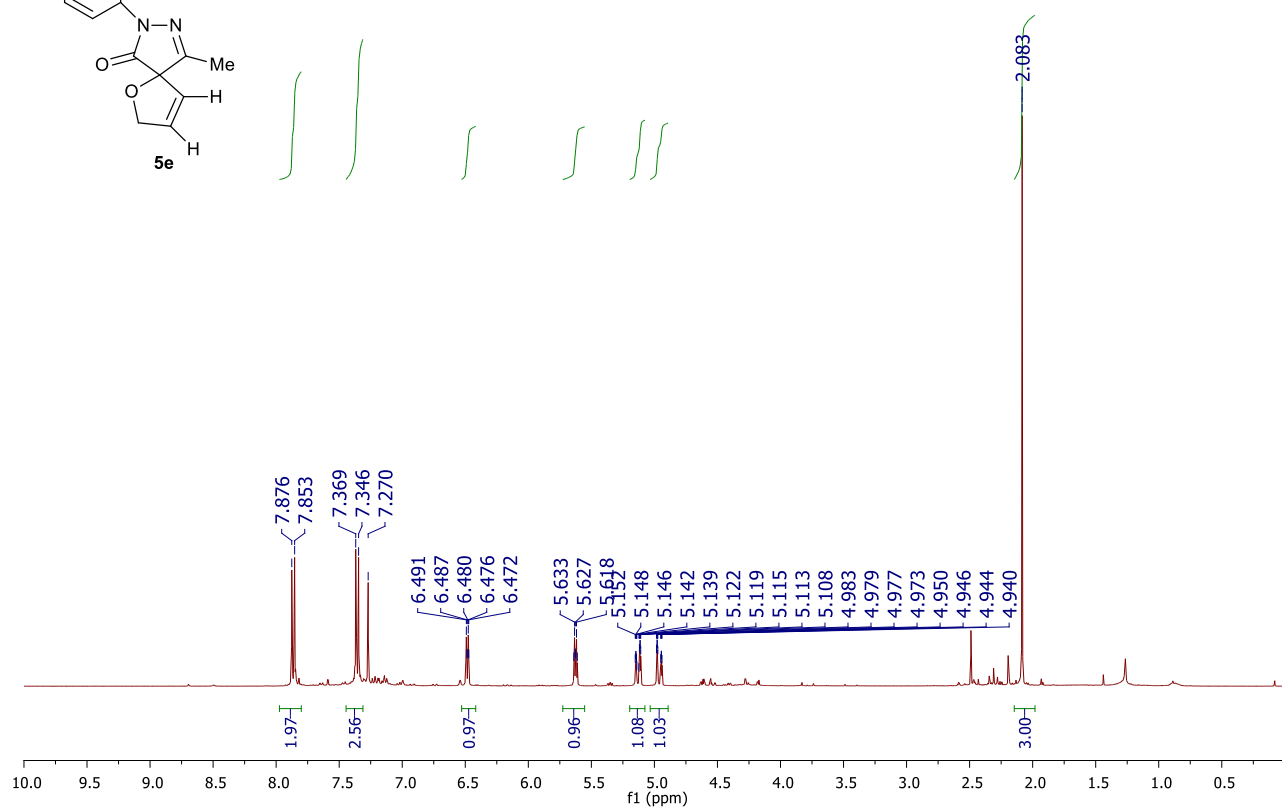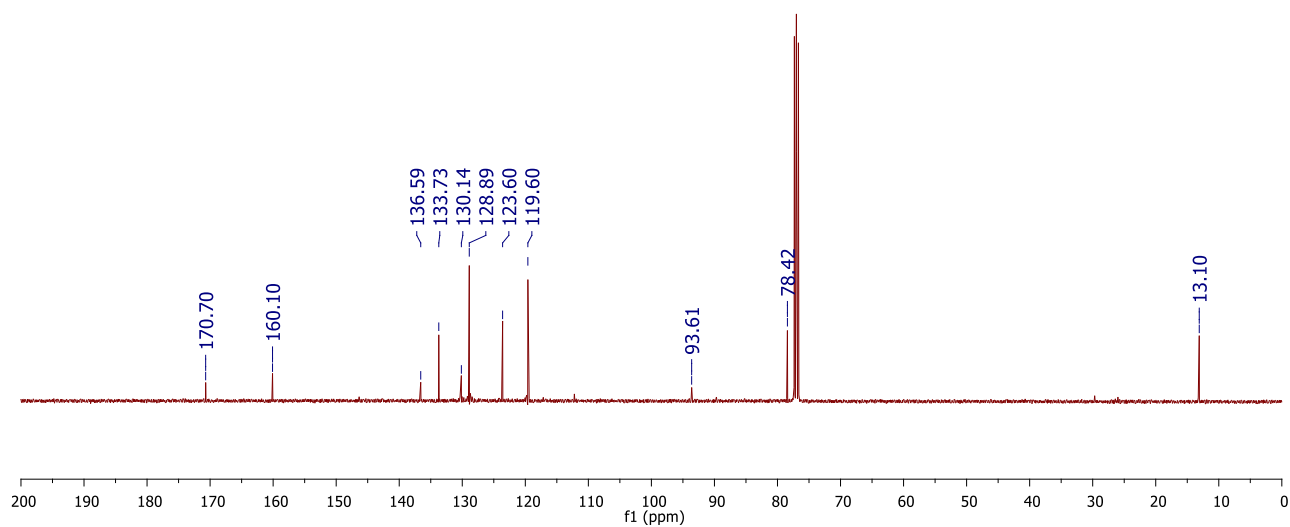

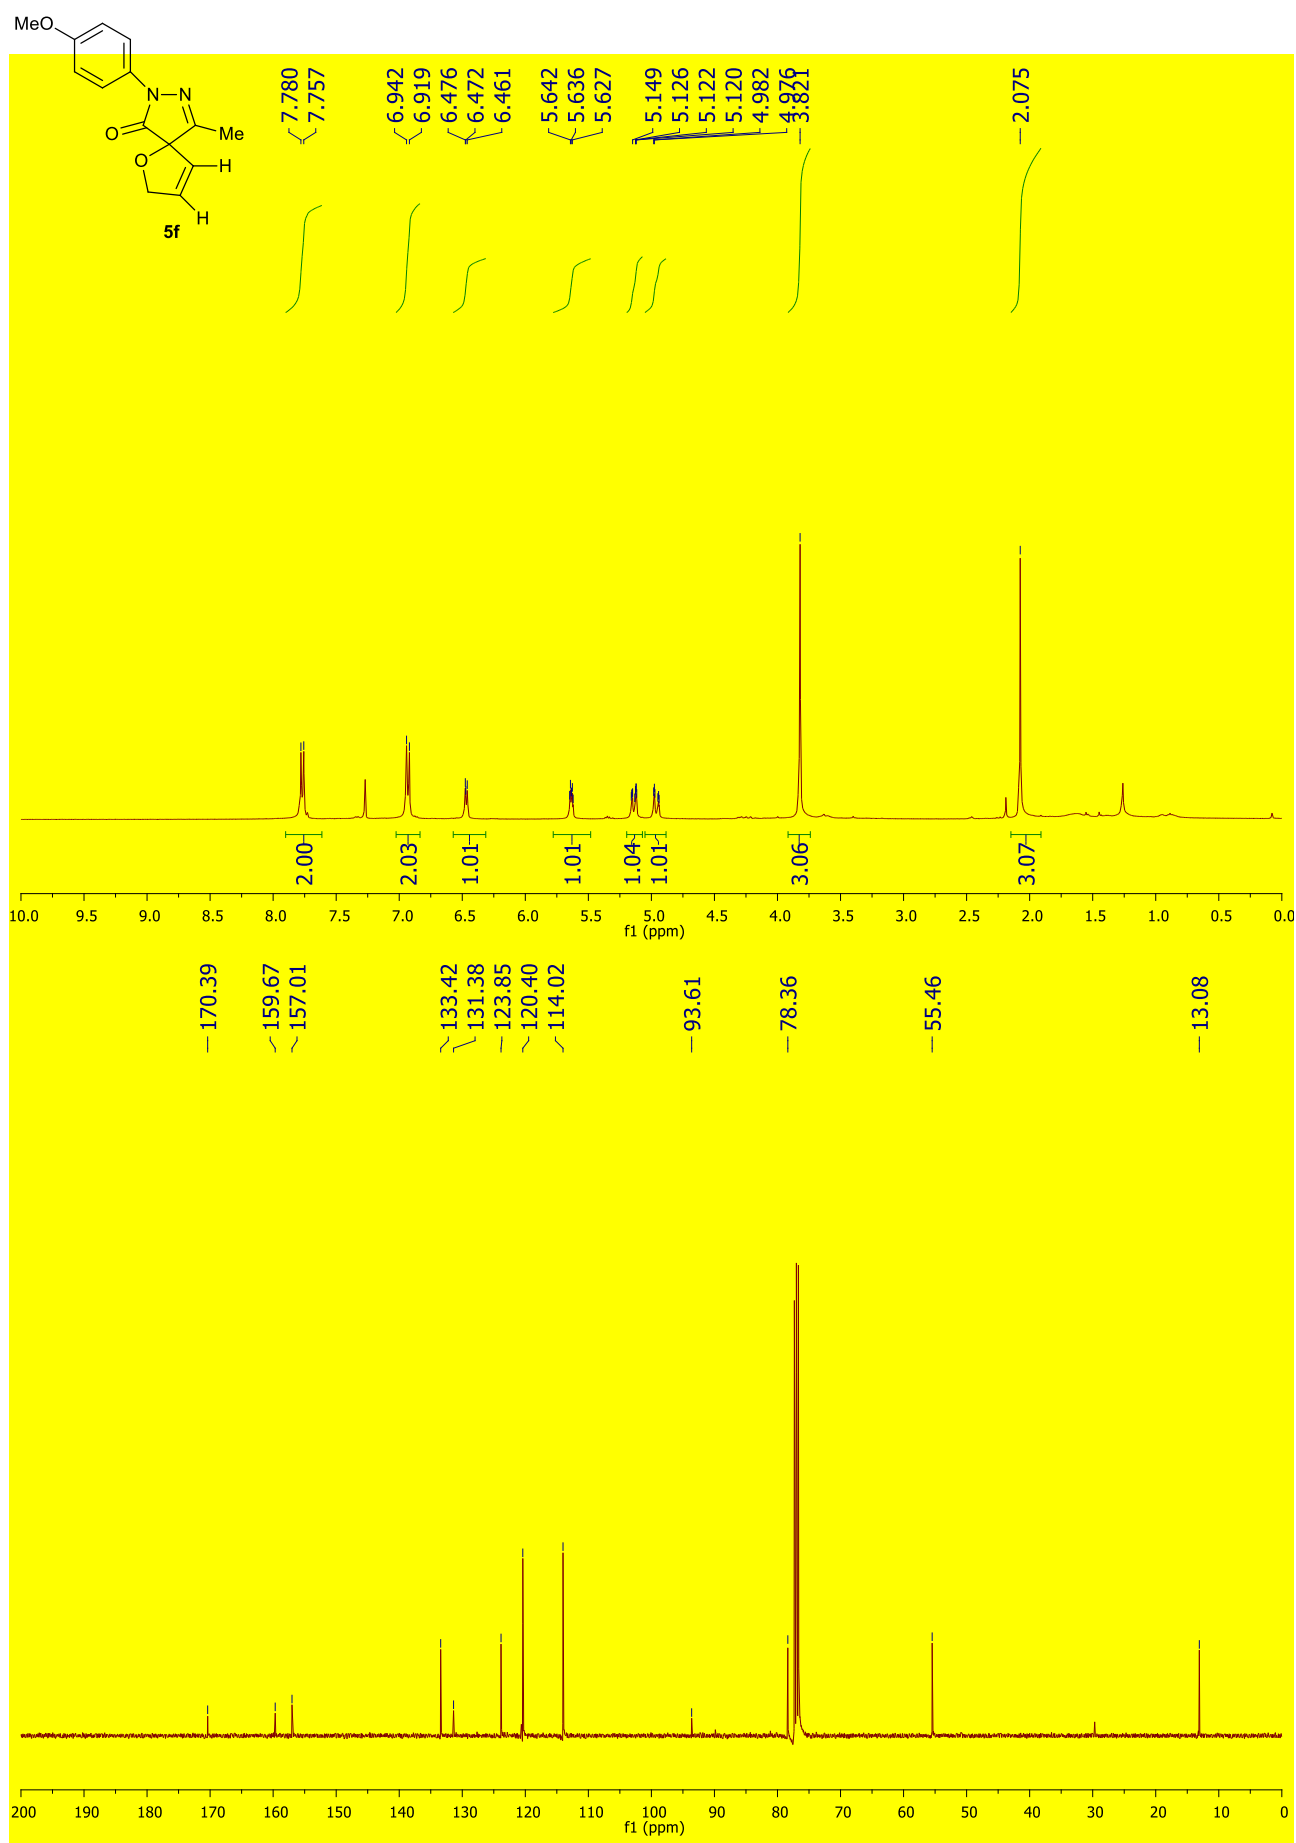

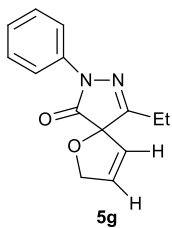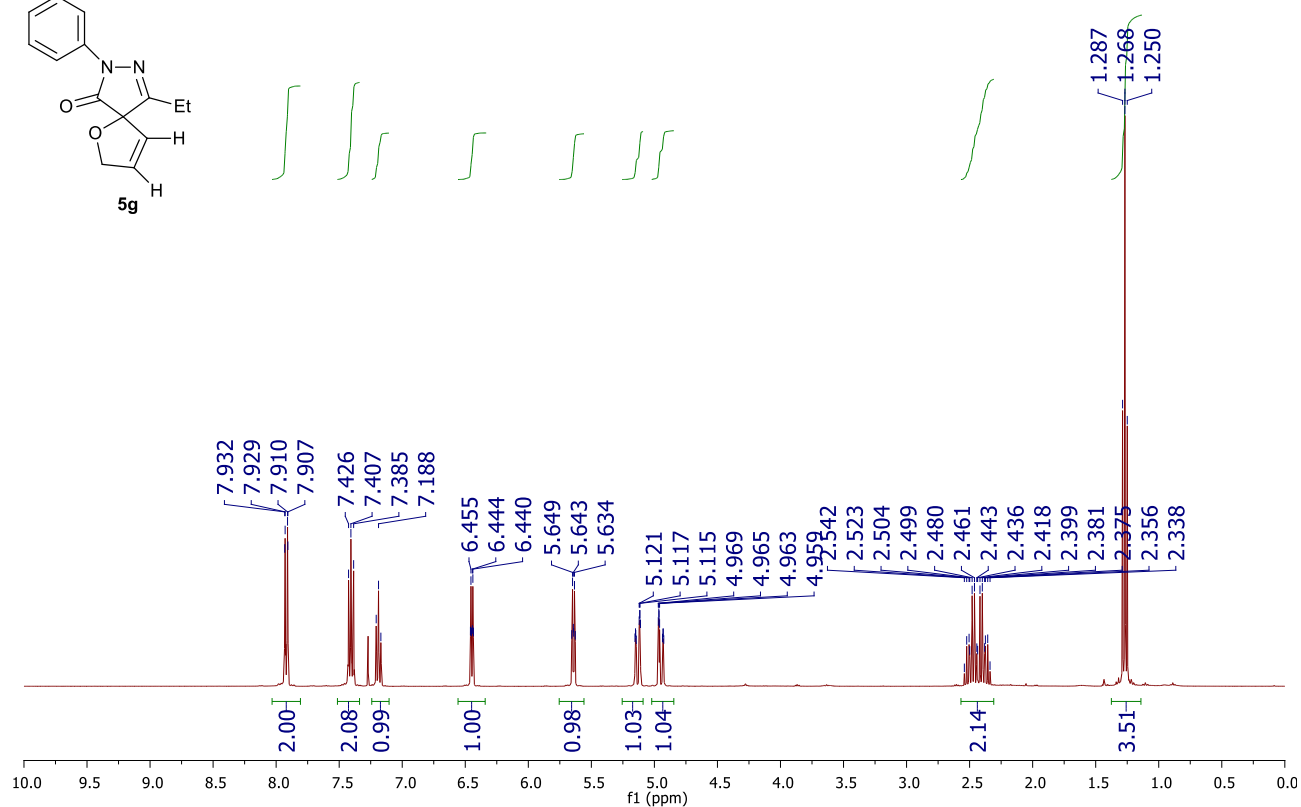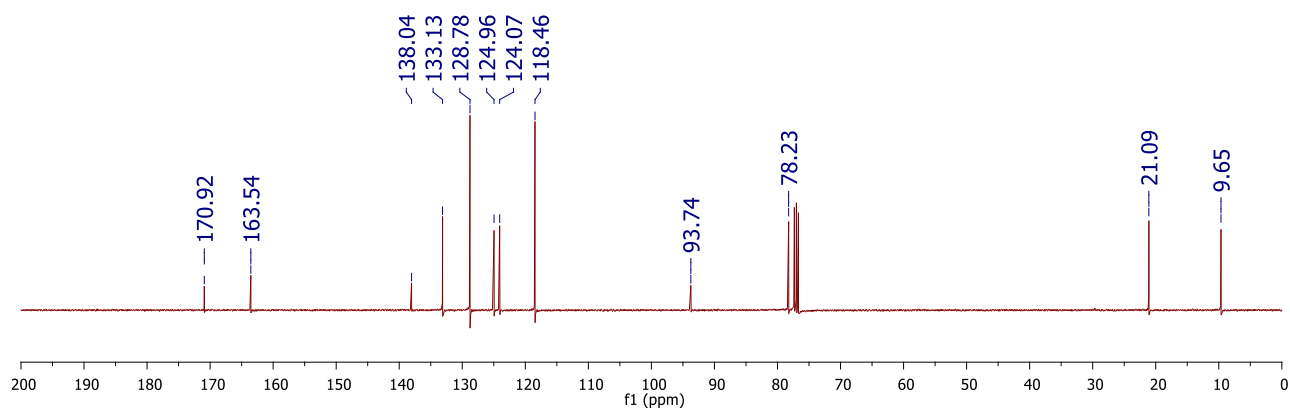

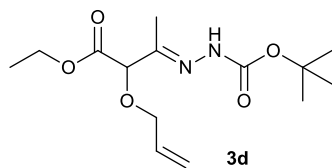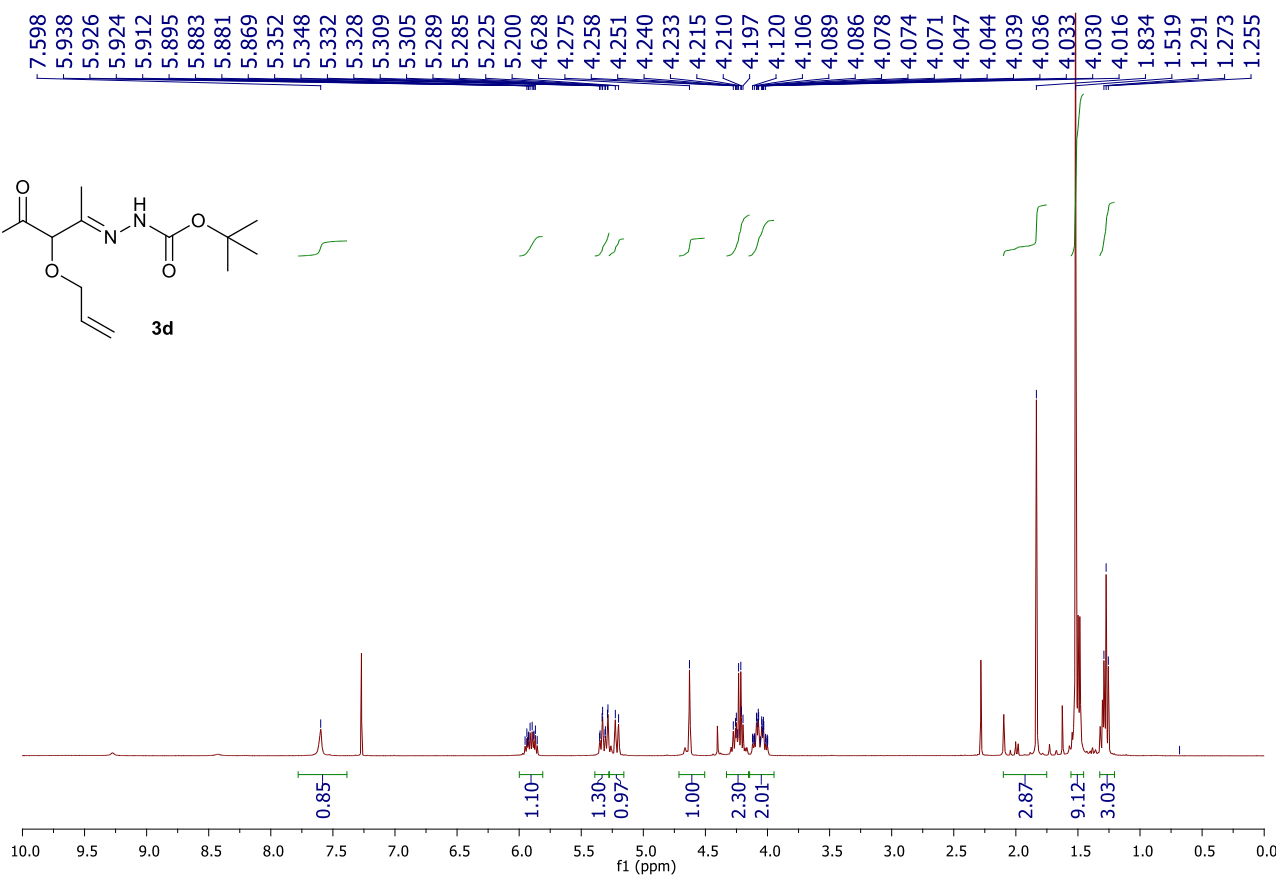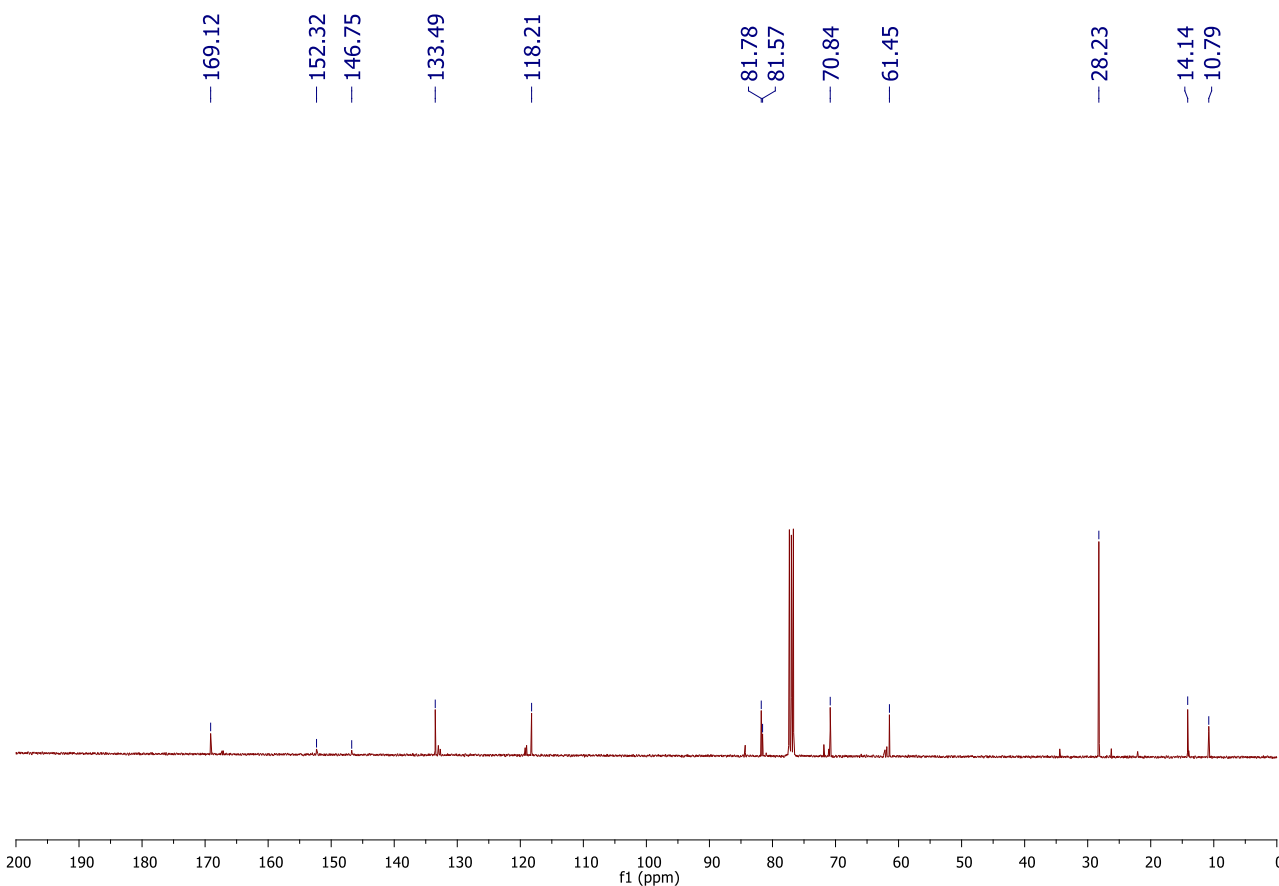

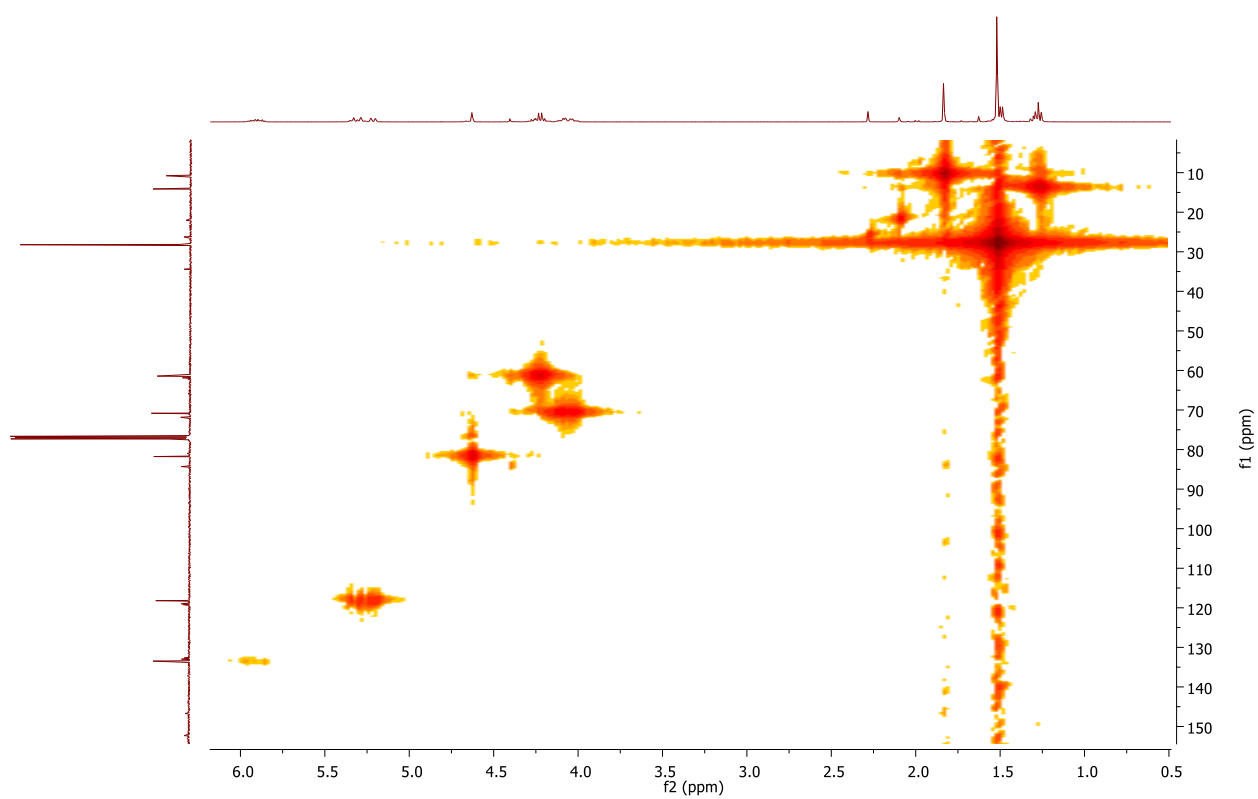

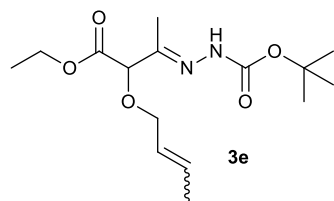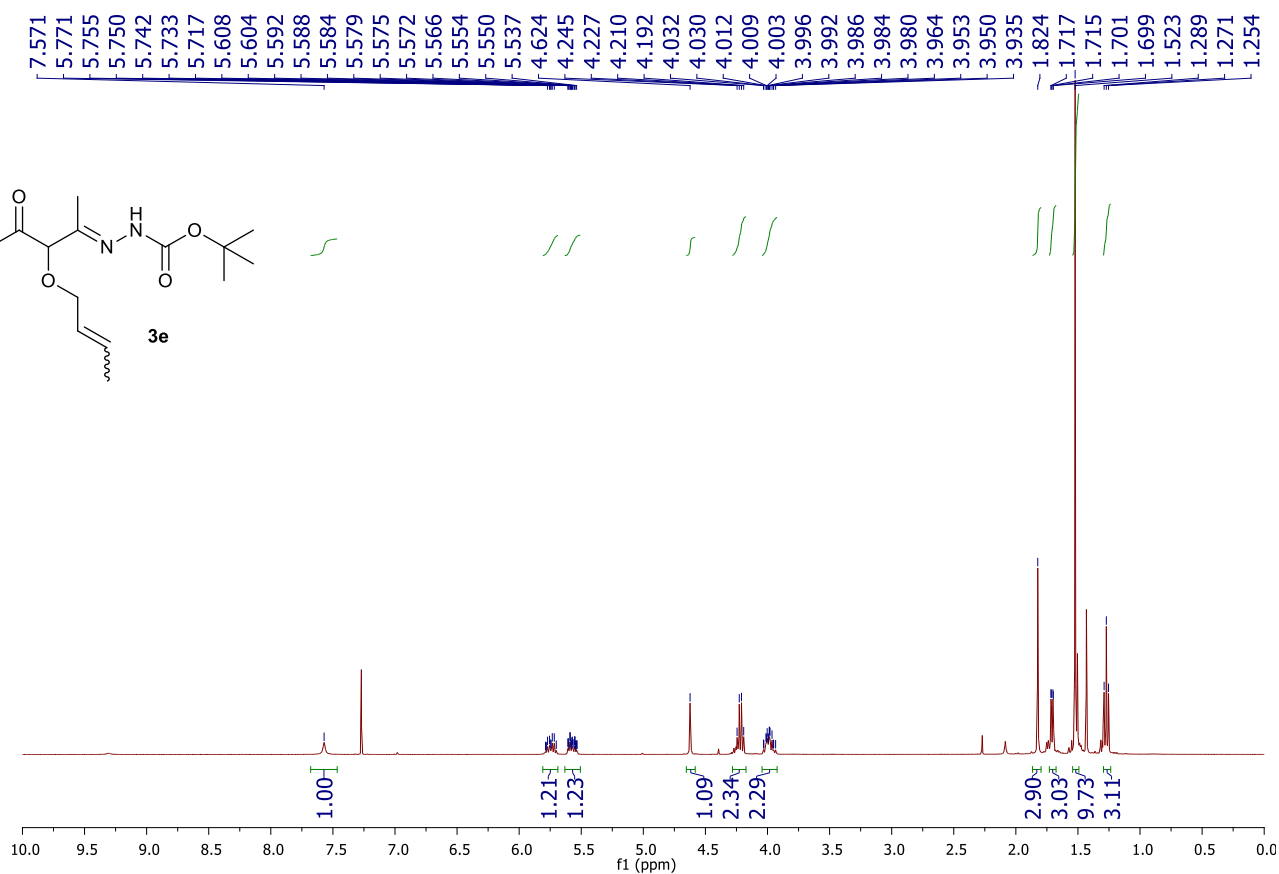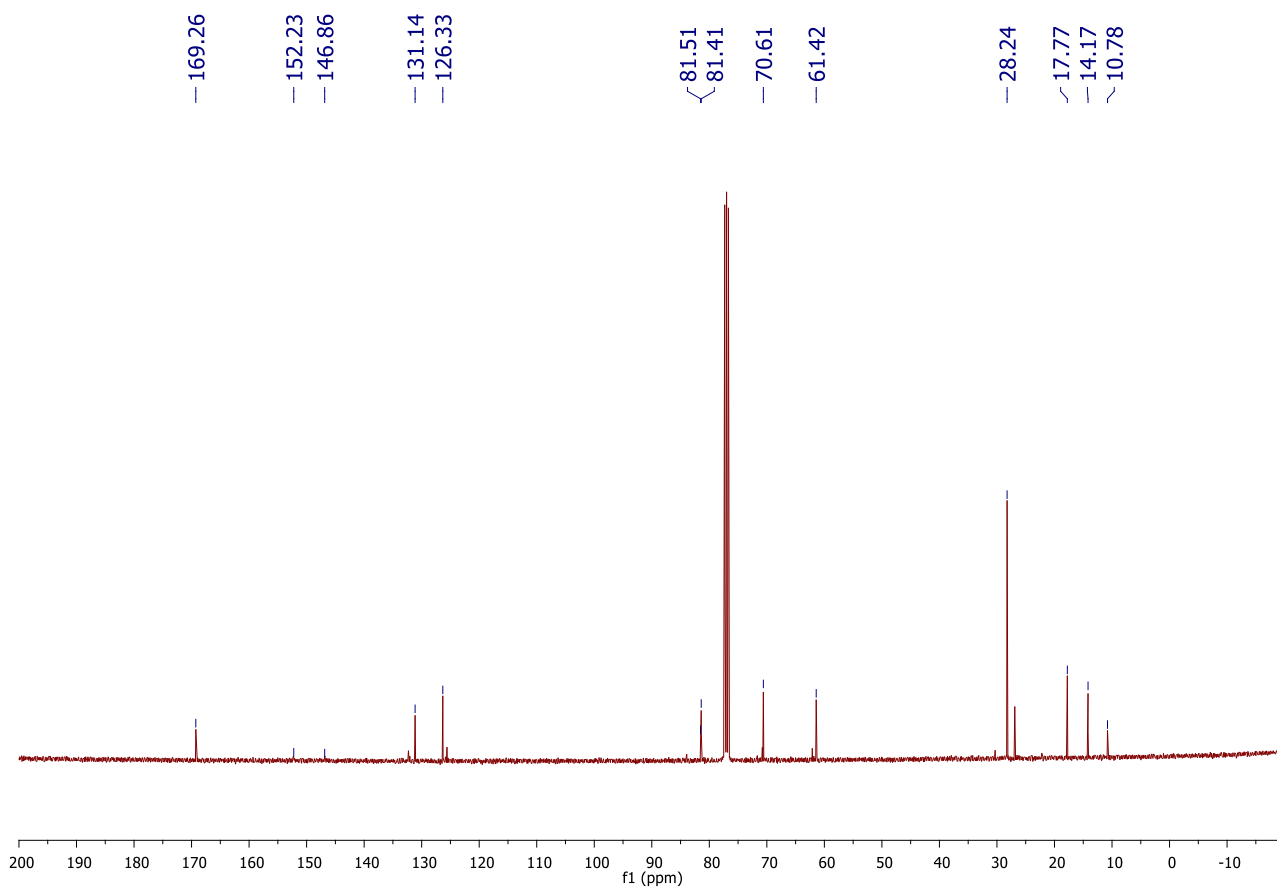



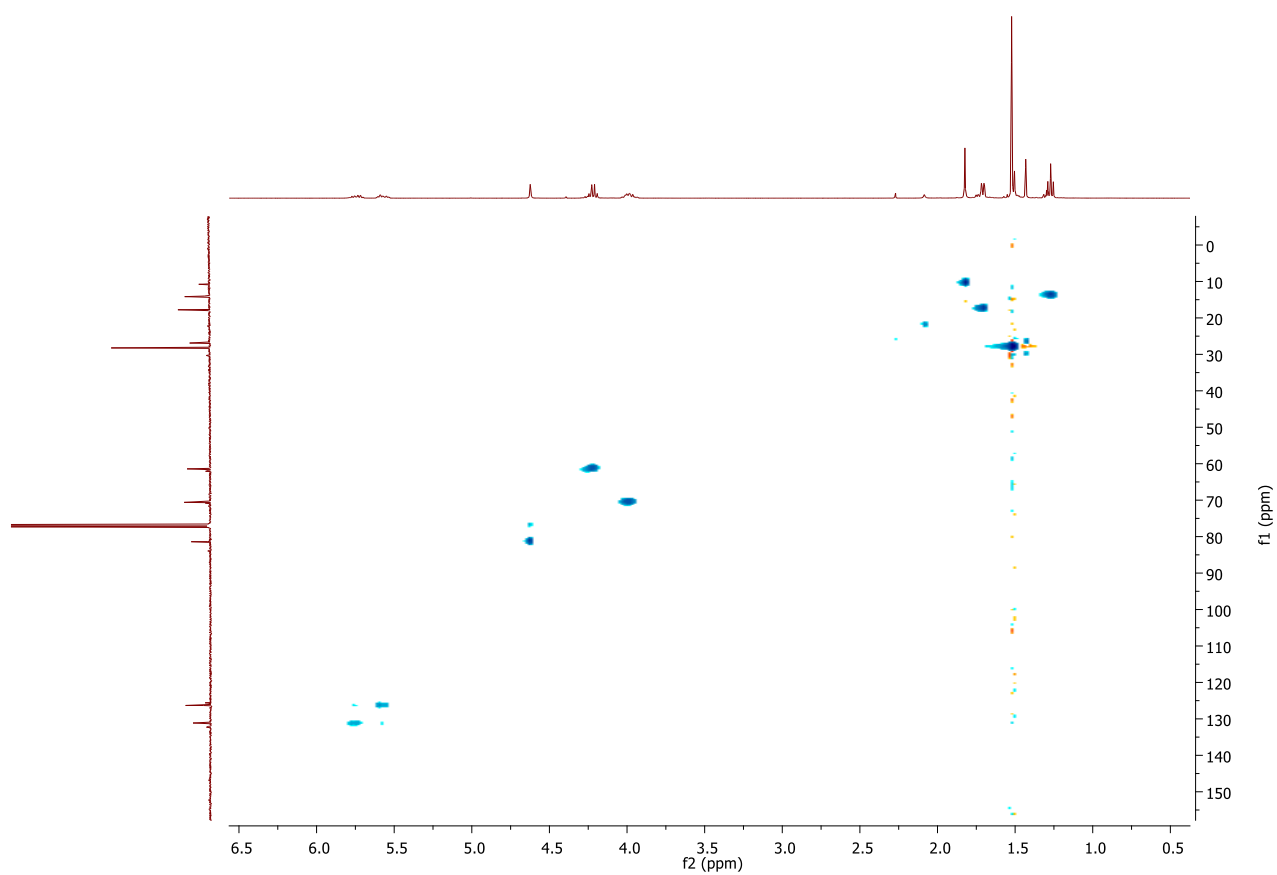

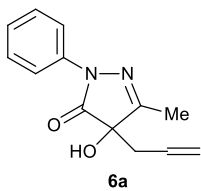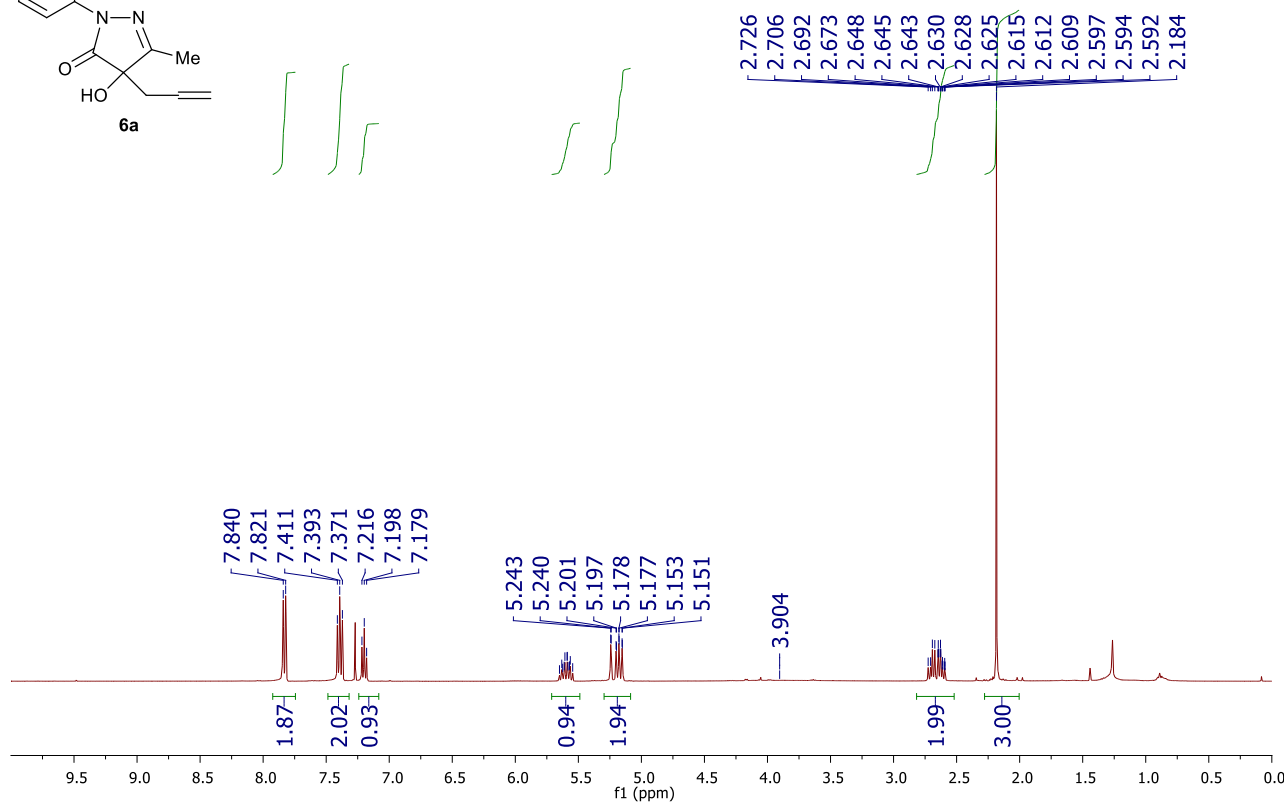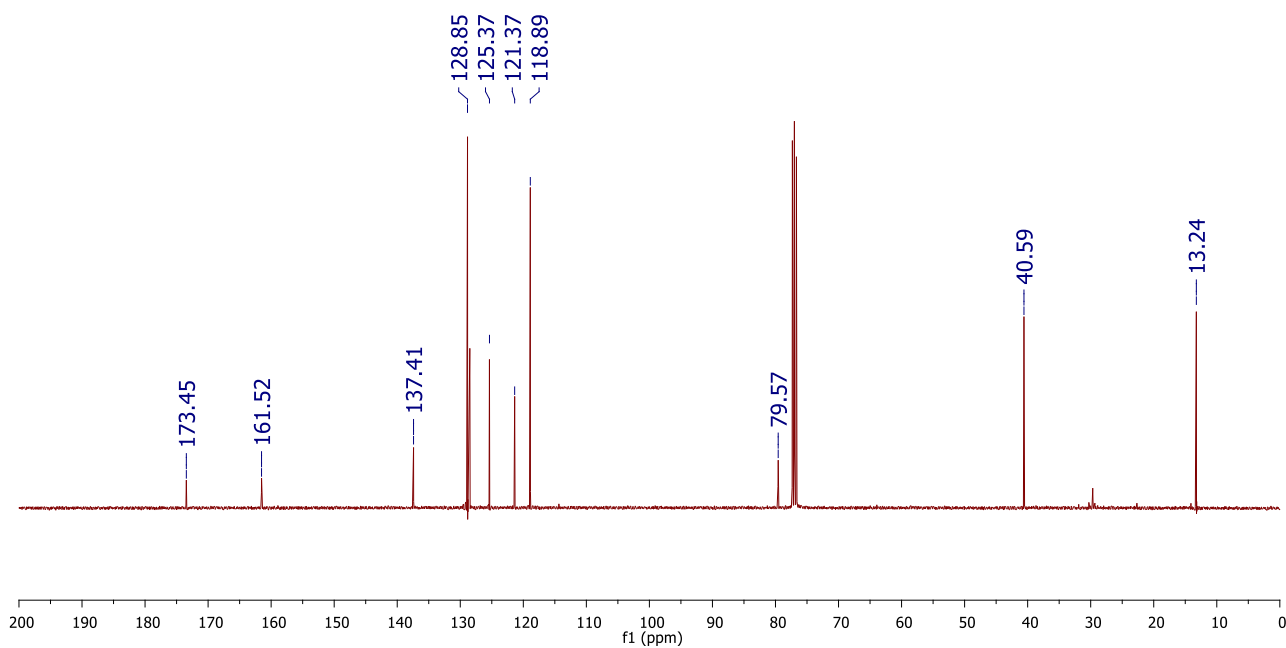

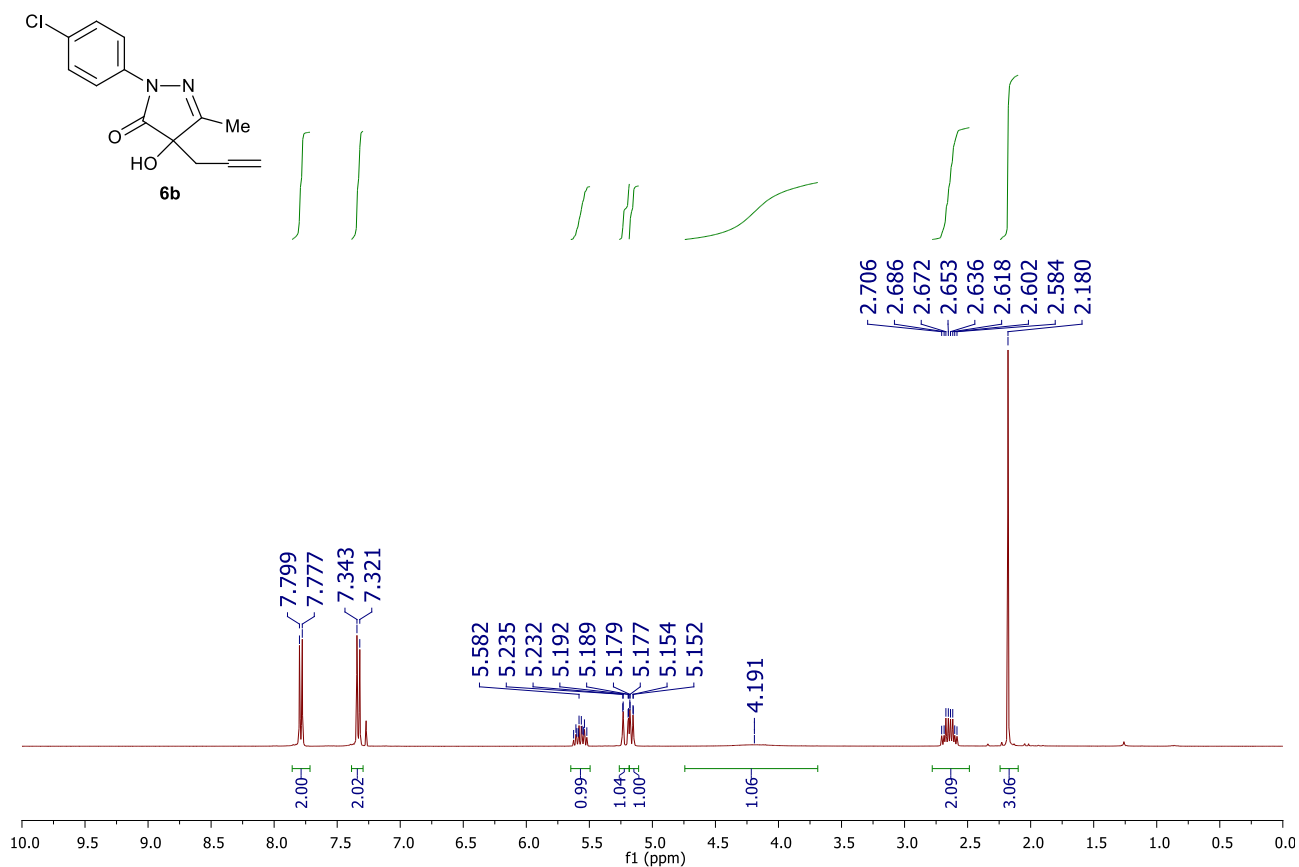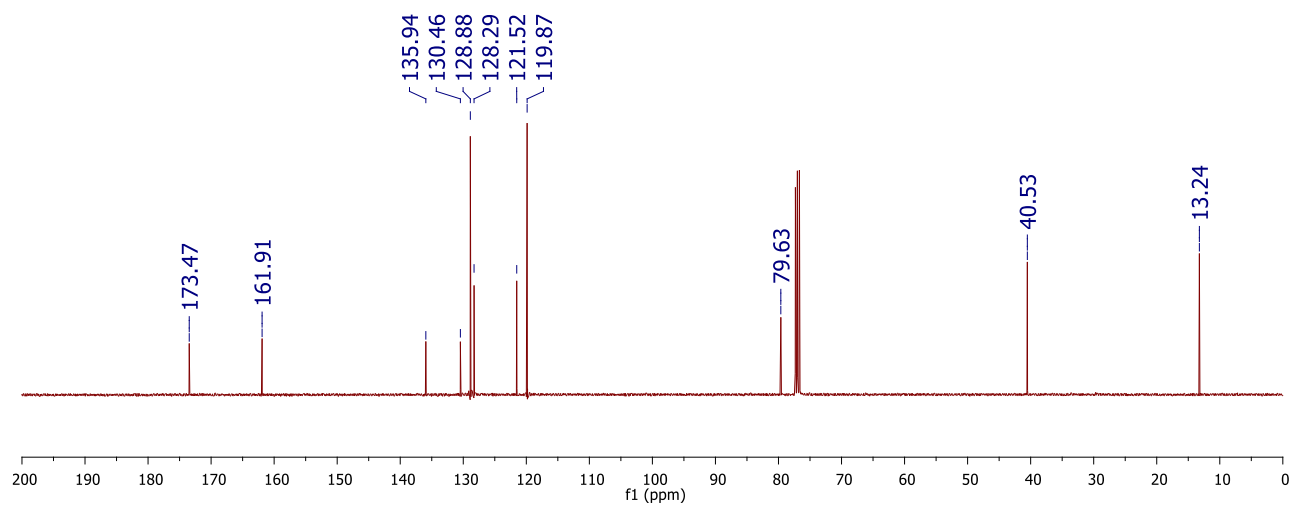

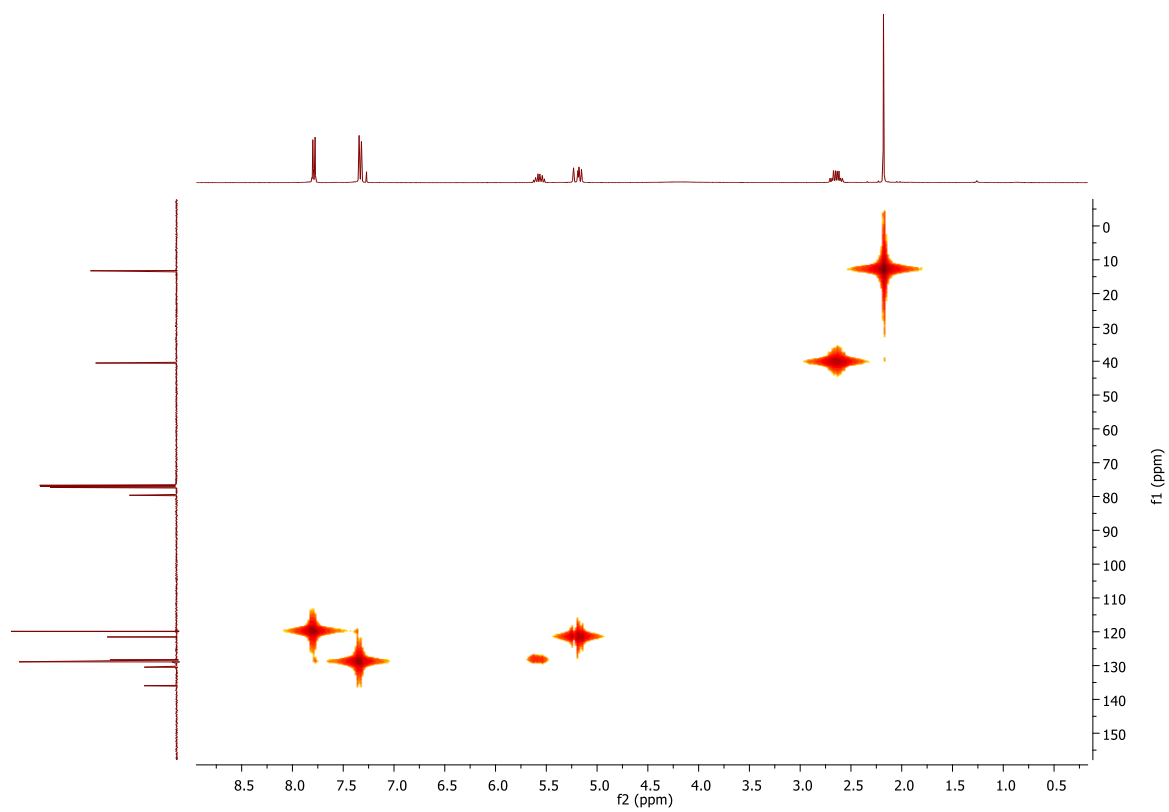

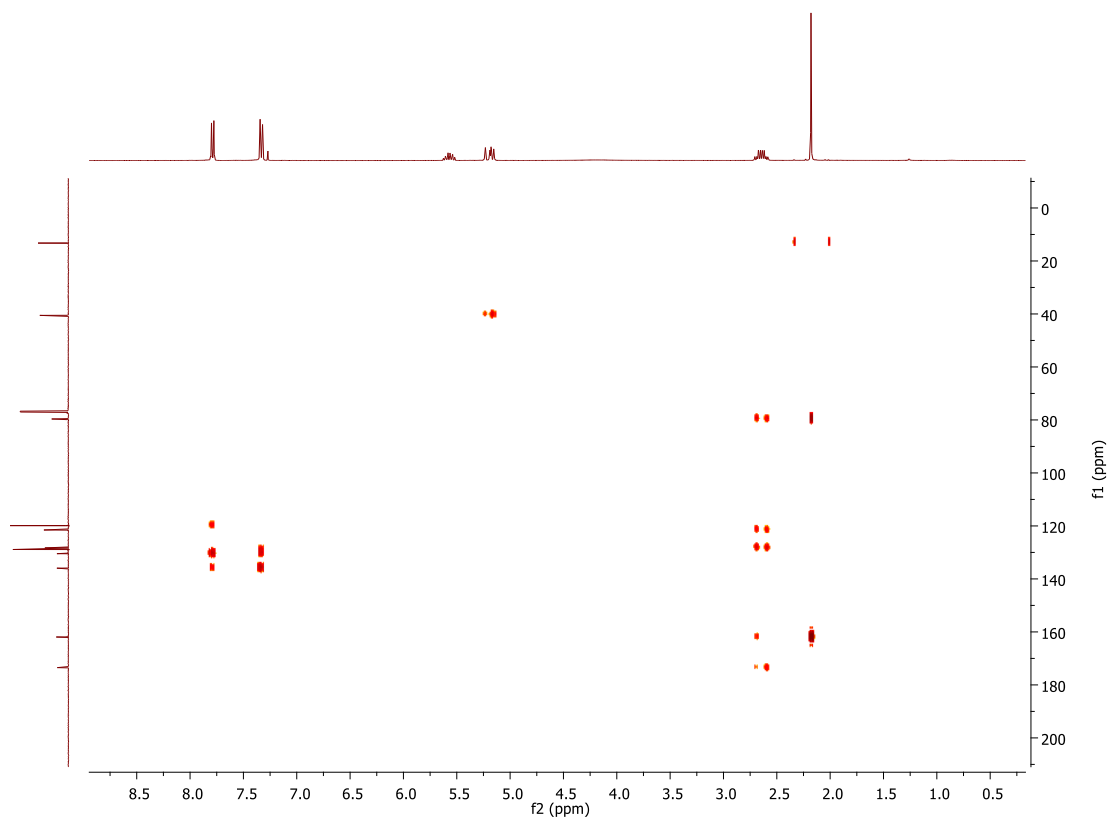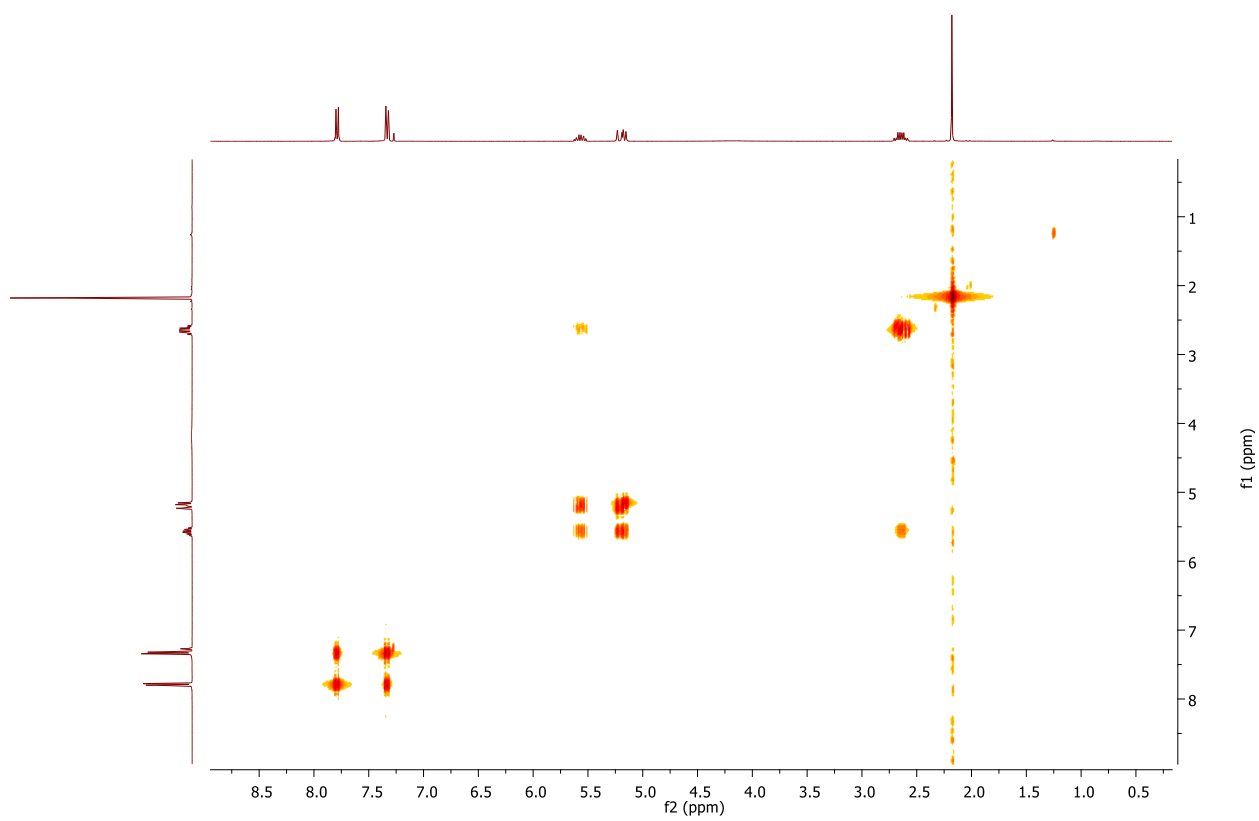

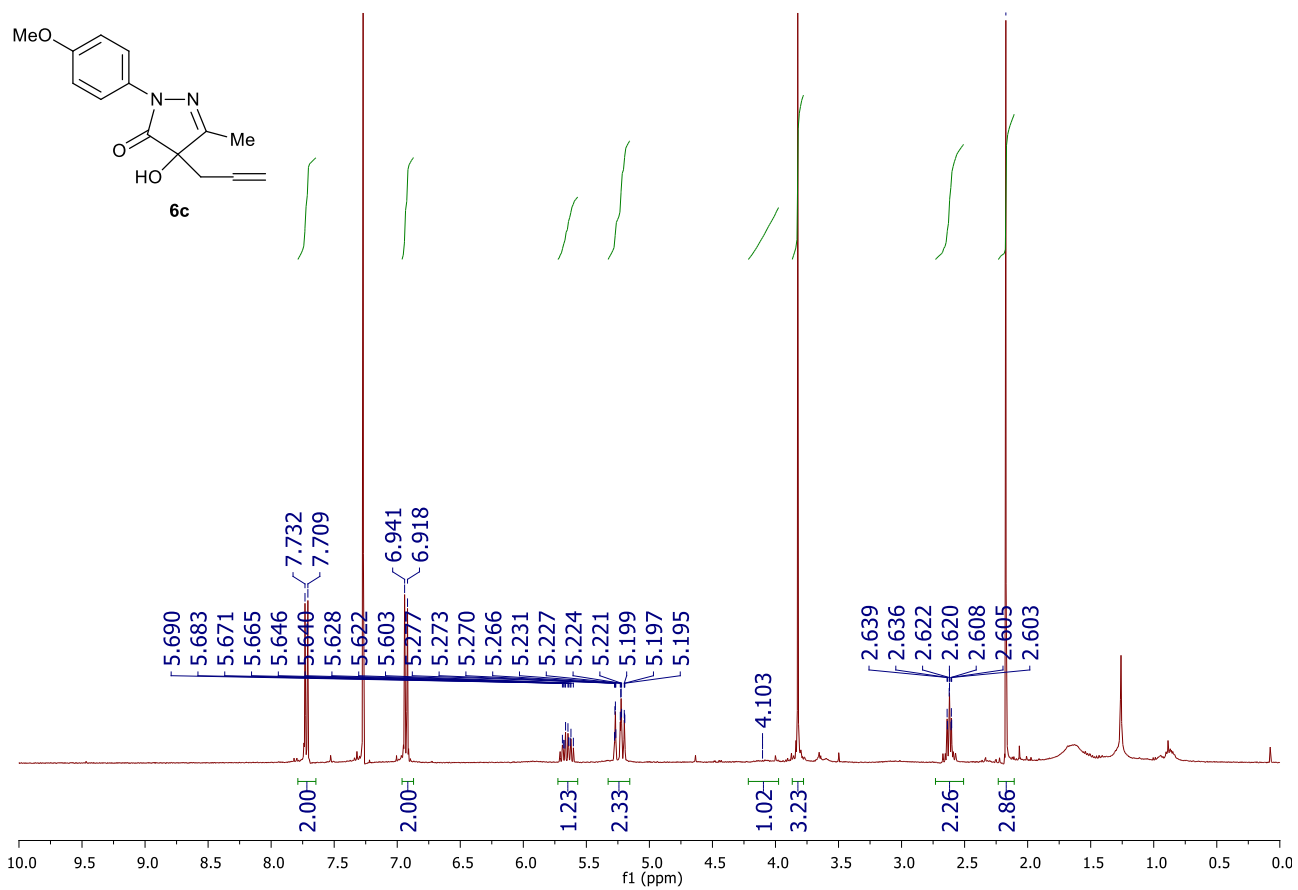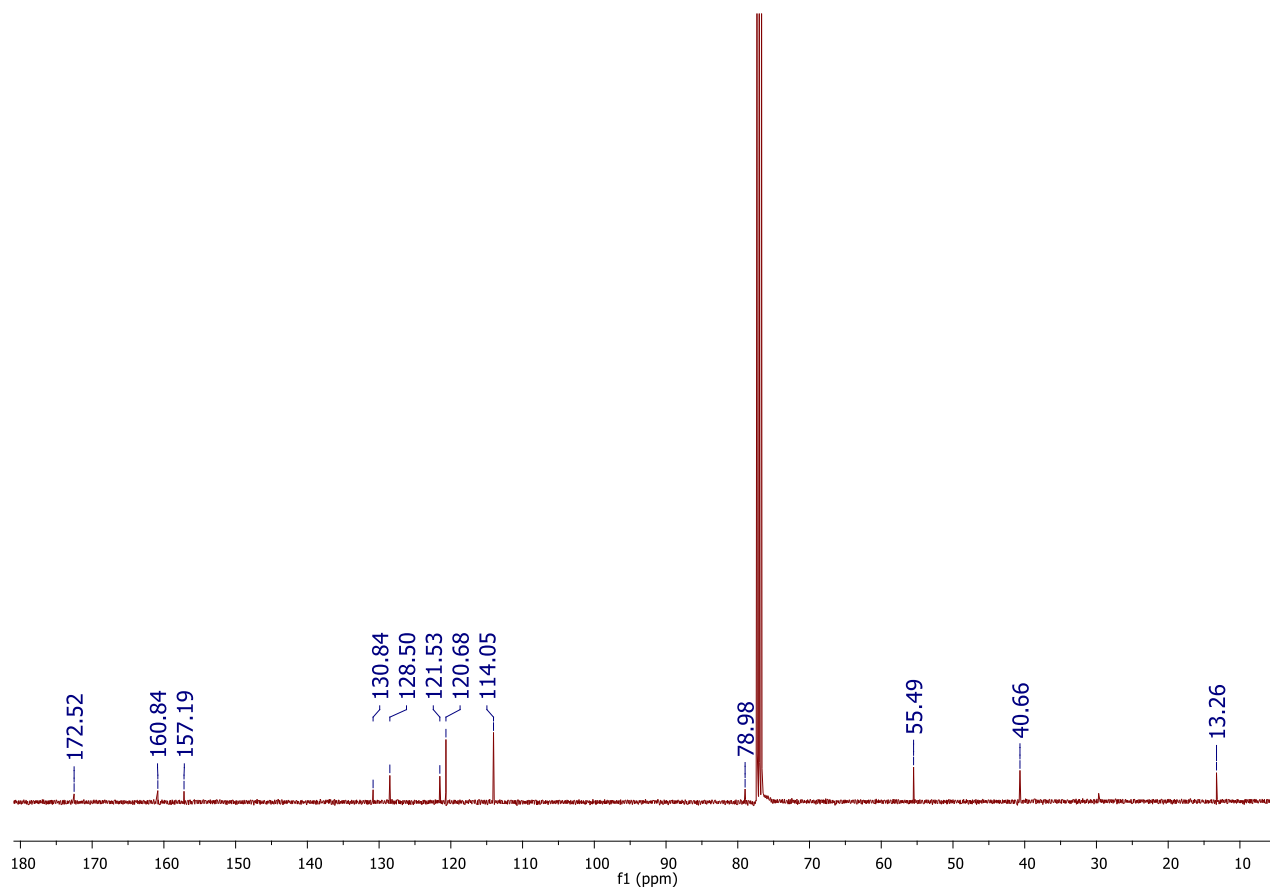

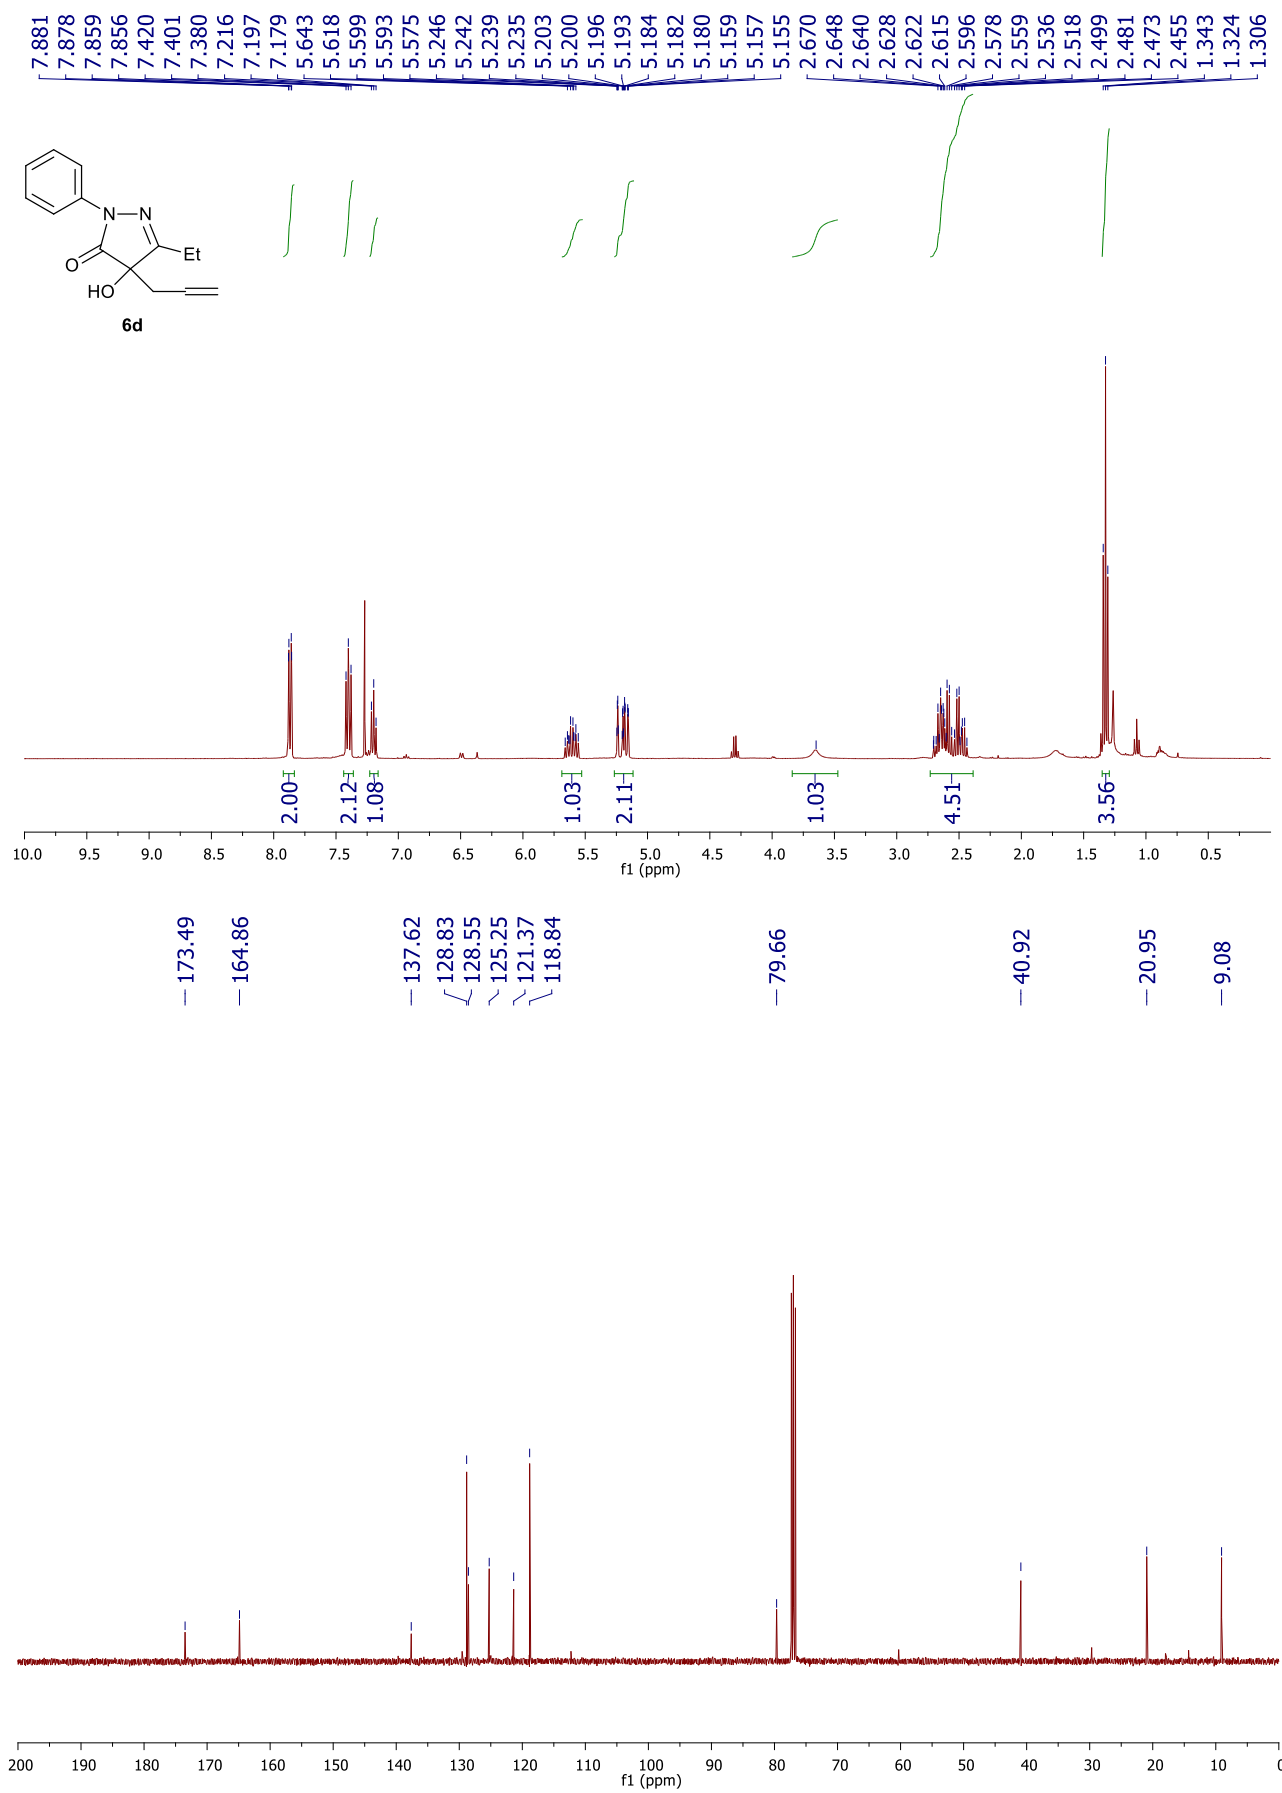

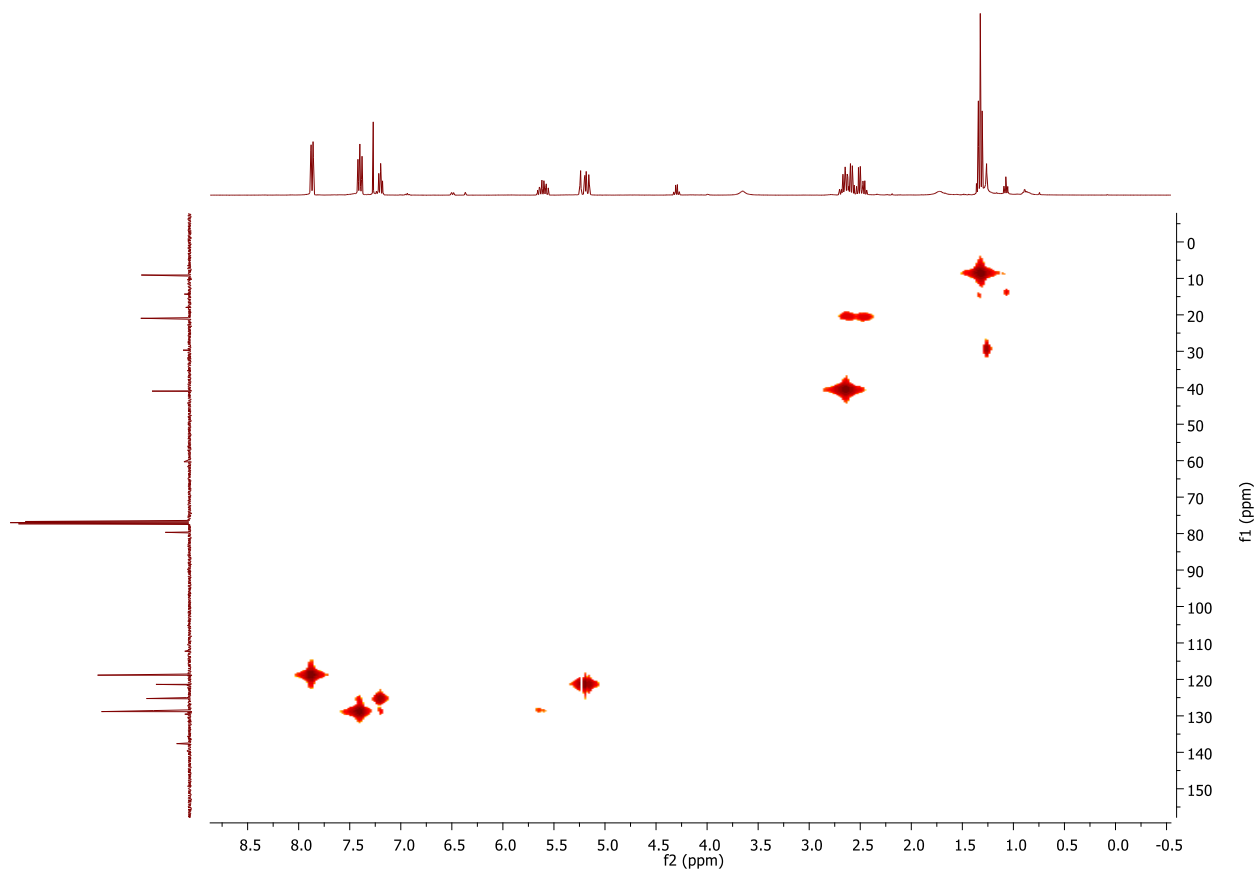



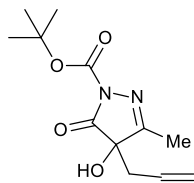

6e

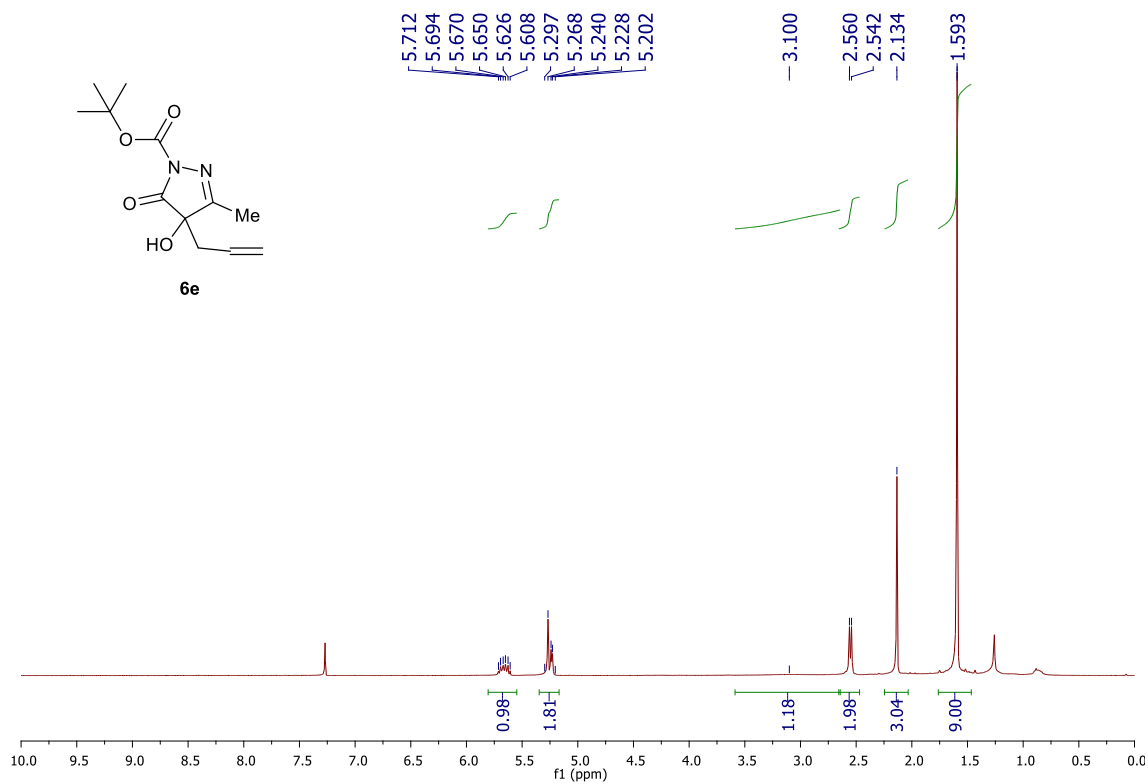

—173.20  
—161.47  
—147.49  
—127.89  
—122.20  
—84.90  
—78.13  
—40.27  
—27.96  
—13.37

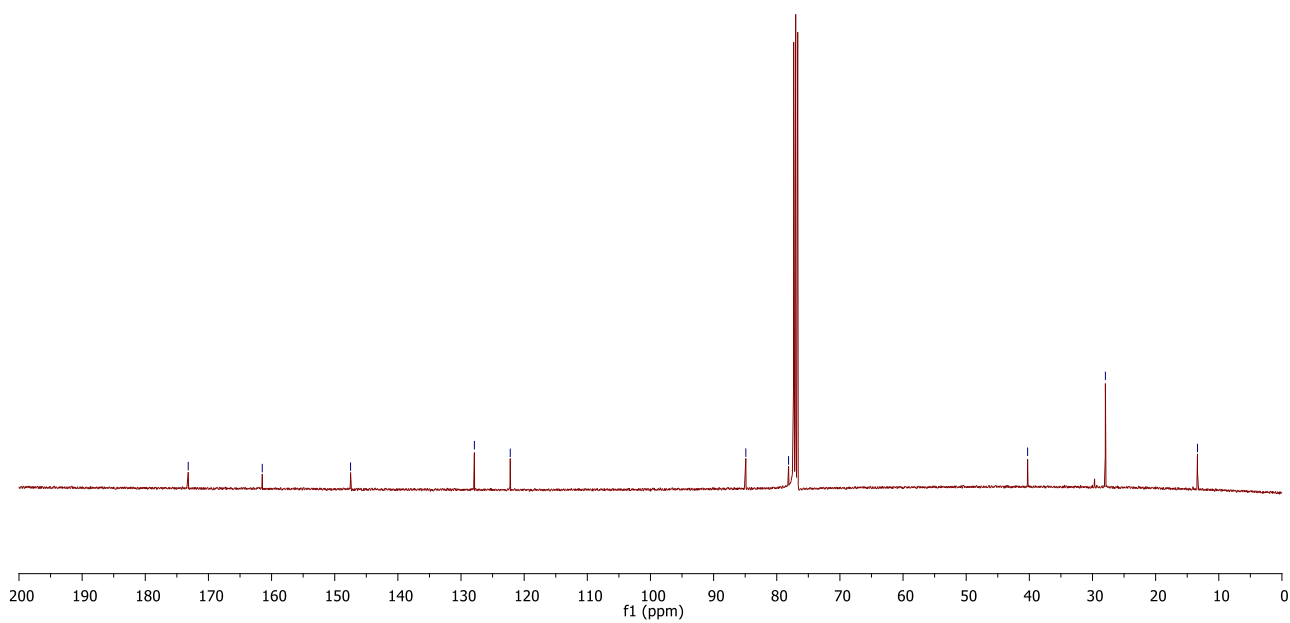

## 6. DFT optimized geometries and energies

29

I

G= -762.638451 ha

|   |                   |                   |                  |
|---|-------------------|-------------------|------------------|
| H | 0.65094385016073  | 0.45956123717303  | 0.36647656871698 |
| C | 0.32211912165911  | 0.18645158139041  | 1.36988940057471 |
| C | -0.51414775940142 | -0.53725129186878 | 3.94124694004111 |
| C | 0.56722338593556  | -1.10552813746985 | 1.83560132848579 |
| C | -0.33436032103601 | 1.12328551636414  | 2.17389682511666 |
| C | -0.74662413325344 | 0.75099823064081  | 3.45675382170635 |
| C | 0.14805008917492  | -1.47288963379147 | 3.12606213597188 |
| H | 1.07693536557474  | -1.83405083628576 | 1.20971519494572 |
| H | -0.52351879699131 | 2.13155764377248  | 1.80458514390921 |
| H | -1.26102976397859 | 1.46983890924901  | 4.09637530852996 |
| H | -0.83921008462009 | -0.82200524443379 | 4.93741353518091 |
| N | 0.40238502261649  | -2.78440390114653 | 3.59040353855318 |
| N | 0.91364440965443  | -3.73290947202527 | 2.67207602724213 |
| C | 1.04481897203475  | -4.86737342477389 | 3.27514801855753 |
| C | 1.52002767693619  | -6.09454365720667 | 2.59285907823589 |
| H | 2.44875378660244  | -6.45601322004967 | 3.05983562326647 |
| H | 1.69718967110561  | -5.90226822114674 | 1.52831888258814 |
| H | 0.77377345353410  | -6.89653166265196 | 2.70265269715890 |
| C | 0.18334986721940  | -3.33196184262962 | 4.84279656096858 |
| O | -0.30324522301092 | -2.79006202163444 | 5.83165740432416 |
| O | -0.25136933944763 | -5.76598860851336 | 5.11663306195774 |
| C | -0.29890931079497 | -5.95162422608064 | 6.55284838737703 |
| H | 0.71678057128556  | -6.18322007849221 | 6.92328769148960 |
| H | -0.63834808852132 | -5.02515027806099 | 7.04391011258198 |
| C | -1.20915722891331 | -7.04457471198620 | 6.85088459528456 |
| H | -2.63803712853552 | -8.75704209599401 | 7.34532642069928 |
| C | -1.96689278897363 | -7.95316749316577 | 7.11217056417192 |
| C | 0.69283810151856  | -4.78054064076994 | 4.73387309754918 |
| H | 1.62001662246557  | -4.86259241841226 | 5.33830203481442 |

28

II

G= -762.185274 ha

|   |           |           |          |
|---|-----------|-----------|----------|
| H | 1.296651  | 0.630363  | 0.711024 |
| C | 0.772430  | 0.307190  | 1.612755 |
| C | -0.568225 | -0.546516 | 3.912604 |
| C | 0.767371  | -1.047047 | 1.944893 |
| C | 0.112774  | 1.247488  | 2.413275 |
| C | -0.552700 | 0.804461  | 3.561633 |
| C | 0.094872  | -1.493330 | 3.102541 |
| H | 1.277089  | -1.778589 | 1.321859 |
| H | 0.118373  | 2.305391  | 2.146441 |

|   |           |           |          |
|---|-----------|-----------|----------|
| H | -1.070516 | 1.521127  | 4.202452 |
| H | -1.082608 | -0.896351 | 4.804537 |
| N | 0.098808  | -2.853417 | 3.425754 |
| N | 0.834885  | -3.734600 | 2.633145 |
| C | 0.637016  | -4.944832 | 3.180660 |
| C | 1.284853  | -6.158063 | 2.595882 |
| H | 1.897968  | -6.684346 | 3.344003 |
| H | 1.930188  | -5.871696 | 1.754415 |
| H | 0.535377  | -6.877970 | 2.231794 |
| C | -0.224688 | -4.874897 | 4.287401 |
| C | -0.599643 | -3.520938 | 4.479480 |
| O | -1.349827 | -2.975838 | 5.346253 |
| O | -0.672206 | -5.945377 | 5.054166 |
| C | -0.222932 | -5.840668 | 6.428780 |
| H | 0.881592  | -5.805409 | 6.453612 |
| H | -0.604631 | -4.901817 | 6.865792 |
| C | -0.704455 | -6.987281 | 7.184896 |
| H | -1.457071 | -8.790434 | 8.369701 |
| C | -1.103744 | -7.944603 | 7.813254 |

28

II'

G= -762.131463 ha (+33.7 kcal/mol with respect to II)

|   |                   |                   |                  |
|---|-------------------|-------------------|------------------|
| H | -0.83566582371782 | -0.07892438792224 | 0.20273805565639 |
| C | -0.52654492581661 | -0.09667903973193 | 1.24877472375725 |
| C | 0.26378687421778  | -0.16708636492517 | 3.93314915217977 |
| C | -0.26688279385759 | -1.32399742695144 | 1.85907724547352 |
| C | -0.39891496176463 | 1.09798735087761  | 1.96473735952923 |
| C | -0.00273849485804 | 1.05070002185847  | 3.30493355153491 |
| C | 0.12790941381108  | -1.36480132815879 | 3.20794022098721 |
| H | -0.36591331400809 | -2.25437693863094 | 1.30447954134094 |
| H | -0.60545446354479 | 2.05474578191555  | 1.48391205696006 |
| H | 0.10742733851512  | 1.97437890594744  | 3.87529920402851 |
| H | 0.57229217892693  | -0.19863419480745 | 4.97395176285687 |
| N | 0.38921944972162  | -2.61061082460556 | 3.81590539334589 |
| N | 0.49319622156442  | -3.75672620678471 | 2.98900130640491 |
| C | 0.69516993763779  | -4.78796755028338 | 3.74916637450661 |
| C | 0.85763753370319  | -6.15354849343666 | 3.19257934550982 |
| H | 1.87120716338501  | -6.53255899820840 | 3.39912242846200 |
| H | 0.68365534750552  | -6.15471254926085 | 2.10866076068482 |
| H | 0.16051069299771  | -6.84300591041828 | 3.69360613809852 |
| C | 0.49705954476528  | -2.91943946533518 | 5.16139899288608 |
| O | 0.40616292162174  | -2.15337418126312 | 6.11782787706373 |
| O | -0.34716450344149 | -5.02817440206920 | 5.97895243263539 |
| C | -0.07658266911309 | -6.36436510066355 | 6.39335857832070 |
| H | 0.81004626847115  | -6.45918014868412 | 7.02813331725767 |
| C | -0.84379021333361 | -7.38355553980049 | 5.97769926753254 |

|   |                   |                   |                  |
|---|-------------------|-------------------|------------------|
| H | -1.51266854384218 | -8.97266607011590 | 4.84169102233756 |
| C | -1.68955979667498 | -8.32227839885776 | 5.71417856393795 |
| C | 0.72050990263039  | -4.43311640774117 | 5.21048068634994 |
| H | 1.69408971449821  | -4.65603213194237 | 5.68424464036065 |

28

TS1

G= -762.107186 ha (+49.0 kcal/mol with respect to II)

|   |           |           |          |
|---|-----------|-----------|----------|
| C | 0.833521  | 0.048228  | 0.737314 |
| C | 0.008147  | 0.118871  | 2.054257 |
| O | -0.463124 | -0.168837 | 0.314685 |
| H | 7.269123  | 2.008474  | 0.165616 |
| C | 6.278618  | 2.398580  | 0.405718 |
| C | 3.727491  | 3.384279  | 0.995058 |
| C | 5.205656  | 1.513563  | 0.517334 |
| C | 6.089528  | 3.774382  | 0.576634 |
| C | 4.810141  | 4.256595  | 0.874138 |
| C | 3.921248  | 2.004101  | 0.807668 |
| H | 5.344715  | 0.443177  | 0.372913 |
| H | 6.930151  | 4.462758  | 0.480574 |
| H | 4.649321  | 5.325849  | 1.024016 |
| H | 2.734626  | 3.760687  | 1.227967 |
| N | 2.830093  | 1.119601  | 0.893257 |
| N | 3.079674  | -0.254056 | 1.106671 |
| C | 1.505065  | 1.368894  | 0.531283 |
| O | 1.018923  | 2.447120  | 0.171208 |
| C | 1.957486  | -0.902177 | 0.890328 |
| C | 1.900459  | -2.378760 | 1.040796 |
| H | 2.848450  | -2.750099 | 1.452630 |
| H | 1.720664  | -2.879737 | 0.075718 |
| H | 1.073325  | -2.663834 | 1.706174 |
| H | 0.765068  | 0.312254  | 2.948455 |
| H | -0.572780 | 1.044630  | 2.129524 |
| C | -0.640990 | -1.066643 | 2.580423 |
| H | -1.707278 | -2.869772 | 3.498617 |
| C | -1.206770 | -2.016557 | 3.086584 |

28

III

G= -762.191648 ha (-4.0 kcal/mol with respect to II)

|   |           |           |          |
|---|-----------|-----------|----------|
| H | 1.327839  | 0.077818  | 0.544465 |
| C | 0.890847  | -0.081326 | 1.531516 |
| C | -0.230658 | -0.512068 | 4.058141 |
| C | 0.698569  | -1.385747 | 1.987059 |
| C | 0.535330  | 1.013668  | 2.326259 |
| C | -0.024871 | 0.785400  | 3.587667 |
| C | 0.136672  | -1.611037 | 3.257611 |

|   |           |           |          |
|---|-----------|-----------|----------|
| H | 0.975114  | -2.238400 | 1.370824 |
| H | 0.691203  | 2.031530  | 1.966620 |
| H | -0.314985 | 1.627988  | 4.217576 |
| H | -0.668442 | -0.686285 | 5.037095 |
| N | -0.051261 | -2.926750 | 3.712883 |
| N | -0.007622 | -3.987961 | 2.760019 |
| C | -0.195332 | -5.100555 | 3.395416 |
| C | -0.255372 | -6.398205 | 2.675791 |
| H | 0.598585  | -7.036016 | 2.954110 |
| H | -0.257625 | -6.250679 | 1.587541 |
| H | -1.164255 | -6.937907 | 2.981728 |
| C | -0.265254 | -3.389164 | 5.000963 |
| O | -0.312020 | -2.707147 | 6.028263 |
| O | -1.794158 | -5.216933 | 5.149426 |
| C | -0.499097 | -4.921612 | 4.882347 |
| C | 0.555388  | -5.617377 | 5.818466 |
| H | 0.372068  | -5.205741 | 6.826120 |
| H | 1.580946  | -5.324895 | 5.530582 |
| C | 0.443315  | -7.063753 | 5.847056 |
| H | 0.253642  | -9.342336 | 5.869935 |
| C | 0.347434  | -8.274509 | 5.862519 |

28

TS2

G= -762.202999 ha (+11.1 kcal/mol with respect to II)

|   |           |           |           |
|---|-----------|-----------|-----------|
| C | -0.083291 | -0.069478 | 0.176406  |
| C | -0.182447 | -0.128732 | 2.306752  |
| H | -4.669837 | 4.715197  | -1.167733 |
| C | -4.582474 | 3.661752  | -0.895230 |
| C | -4.331793 | 0.964012  | -0.201672 |
| C | -3.314251 | 3.113122  | -0.705654 |
| C | -5.732452 | 2.878015  | -0.747737 |
| C | -5.592177 | 1.530381  | -0.399502 |
| C | -3.175568 | 1.754882  | -0.357501 |
| H | -2.419045 | 3.720384  | -0.821198 |
| H | -6.721756 | 3.310967  | -0.901580 |
| H | -6.477635 | 0.904499  | -0.273152 |
| H | -4.222933 | -0.083176 | 0.068006  |
| N | -1.896944 | 1.214982  | -0.160285 |
| N | -0.793865 | 2.083855  | -0.123051 |
| C | 0.270772  | 1.315961  | 0.041545  |
| C | 1.641668  | 1.891791  | 0.128013  |
| H | 2.103578  | 1.645222  | 1.096715  |
| H | 1.608220  | 2.983552  | 0.015837  |
| H | 2.292629  | 1.472258  | -0.654219 |
| C | -1.516853 | -0.145235 | -0.063552 |
| O | -2.273898 | -1.134521 | -0.163108 |

|   |           |           |          |
|---|-----------|-----------|----------|
| O | 0.761210  | -1.121320 | 0.023930 |
| C | 1.144062  | -1.854360 | 1.334419 |
| H | 0.770356  | -2.883442 | 1.222025 |
| H | 2.244549  | -1.870786 | 1.337303 |
| C | 0.560828  | -1.146691 | 2.458248 |
| H | -0.785114 | 0.667320  | 2.722676 |

28

IV

G= -762.173640 ha (+7.3 kcal/mol with respect to II)

|   |           |           |           |
|---|-----------|-----------|-----------|
| H | 0.296318  | -0.046249 | -0.675626 |
| C | 0.162312  | 0.097856  | 0.398205  |
| C | -0.170336 | 0.440628  | 3.154005  |
| C | 0.280606  | -1.001547 | 1.248504  |
| C | -0.120701 | 1.370347  | 0.905850  |
| C | -0.283228 | 1.527677  | 2.285859  |
| C | 0.113798  | -0.839164 | 2.637172  |
| H | 0.505212  | -1.988892 | 0.852508  |
| H | -0.212334 | 2.226550  | 0.236461  |
| H | -0.505418 | 2.512088  | 2.701373  |
| H | -0.299888 | 0.566770  | 4.225517  |
| N | 0.242807  | -1.952303 | 3.486878  |
| N | 0.446145  | -3.228570 | 2.897851  |
| C | 0.133431  | -2.027475 | 4.874666  |
| O | -0.140708 | -1.107485 | 5.649039  |
| C | 0.495280  | -3.467406 | 5.218902  |
| C | 0.513687  | -4.097126 | 3.862207  |
| C | 0.679886  | -5.551386 | 3.613230  |
| H | 0.722558  | -5.764739 | 2.538142  |
| H | -0.157429 | -6.107814 | 4.061569  |
| H | 1.598954  | -5.915353 | 4.097368  |
| O | -0.341372 | -4.068027 | 6.173579  |
| C | 0.522222  | -4.463290 | 7.361787  |
| H | 0.382017  | -5.550364 | 7.499689  |
| H | 0.097715  | -3.949479 | 8.241855  |
| C | 1.917657  | -4.080132 | 7.069671  |
| C | 1.942180  | -3.511090 | 5.858797  |
| H | 2.774630  | -3.097027 | 5.284942  |

28

TS3

G= -762.204273 ha (+10.3 kcal/mol with respect to II)

|   |           |           |           |
|---|-----------|-----------|-----------|
| O | -0.093514 | -0.004048 | -0.104157 |
| C | 0.181056  | 0.023652  | 1.960086  |
| H | 5.078997  | 2.278648  | -5.733726 |
| C | 4.237048  | 2.628524  | -5.133640 |
| C | 2.083333  | 3.504956  | -3.579423 |

|   |           |           |           |
|---|-----------|-----------|-----------|
| C | 3.708556  | 1.789610  | -4.152785 |
| C | 3.705429  | 3.904787  | -5.347208 |
| C | 2.629164  | 4.331209  | -4.562902 |
| C | 2.625192  | 2.222534  | -3.365247 |
| H | 4.123516  | 0.798552  | -3.984316 |
| H | 4.124162  | 4.557142  | -6.114635 |
| H | 2.198479  | 5.321722  | -4.718193 |
| H | 1.244565  | 3.837420  | -2.973846 |
| N | 2.105546  | 1.372946  | -2.373472 |
| N | 2.479949  | -0.001216 | -2.399888 |
| C | 1.224918  | 1.660089  | -1.333696 |
| O | 0.672128  | 2.740876  | -1.116821 |
| C | 1.136684  | 0.368613  | -0.510519 |
| C | 1.904370  | -0.580190 | -1.391965 |
| C | 2.021077  | -2.037739 | -1.140169 |
| H | 2.649642  | -2.524342 | -1.896467 |
| H | 1.020264  | -2.495290 | -1.146325 |
| H | 2.444302  | -2.216182 | -0.139656 |
| H | -0.064627 | -1.018486 | 2.192224  |
| H | -0.598607 | 0.740282  | 2.240368  |
| C | 1.491778  | 0.422316  | 1.887472  |
| C | 2.135014  | 0.642028  | 0.761626  |
| H | 3.162668  | 0.952746  | 0.564780  |

28

V

G= -762.218713 ha (-21.0 kcal/mol with respect to II)

|   |           |           |           |
|---|-----------|-----------|-----------|
| O | -0.090603 | -0.000310 | -0.886142 |
| C | -0.065071 | -0.106927 | 2.818847  |
| H | 4.881680  | 2.211466  | -6.143787 |
| C | 4.141976  | 2.606528  | -5.428938 |
| C | 2.252738  | 3.593440  | -3.593871 |
| C | 3.683006  | 1.777963  | -4.395018 |
| C | 3.671829  | 3.926083  | -5.559529 |
| C | 2.727189  | 4.406260  | -4.634228 |
| C | 2.731445  | 2.264749  | -3.464256 |
| H | 4.042657  | 0.747189  | -4.288055 |
| H | 4.036508  | 4.571933  | -6.372881 |
| H | 2.344468  | 5.435356  | -4.721301 |
| H | 1.520734  | 3.964682  | -2.866655 |
| N | 2.282678  | 1.427886  | -2.427673 |
| N | 2.658324  | 0.060091  | -2.457381 |
| C | 1.461951  | 1.737173  | -1.334294 |
| O | 0.988545  | 2.844845  | -1.071572 |
| C | 1.169349  | 0.375469  | -0.619040 |
| C | 2.128971  | -0.521189 | -1.422721 |
| C | 2.247329  | -1.982161 | -1.167955 |

|   |           |           |           |
|---|-----------|-----------|-----------|
| H | 2.711598  | -2.518645 | -2.018201 |
| H | 1.221354  | -2.367464 | -0.990798 |
| H | 2.835769  | -2.178962 | -0.246153 |
| H | -0.159351 | -1.133323 | 3.218196  |
| H | -0.714753 | 0.664239  | 3.271940  |
| C | 0.785567  | 0.185261  | 1.852069  |
| C | 1.605414  | 0.468819  | 0.859516  |
| H | 2.644673  | 0.791019  | 1.065930  |

29

IVH

G = -762.697709 ha

|   |          |          |          |
|---|----------|----------|----------|
| H | 0.15826  | -0.11345 | -1.05424 |
| O | 0.61266  | 0.09479  | 2.28822  |
| C | -0.80547 | -0.02365 | 2.18540  |
| H | -6.22085 | 0.56681  | 6.28711  |
| C | -5.41907 | 1.16367  | 5.84983  |
| C | -3.35454 | 2.67870  | 4.71874  |
| C | -4.45069 | 0.53349  | 5.06796  |
| C | -5.37059 | 2.54393  | 6.07001  |
| C | -4.33552 | 3.29150  | 5.50058  |
| C | -3.41391 | 1.29156  | 4.49912  |
| H | -4.48726 | -0.53995 | 4.89390  |
| H | -6.13145 | 3.03195  | 6.68042  |
| H | -4.28036 | 4.36807  | 5.66995  |
| H | -2.54909 | 3.26232  | 4.28106  |
| N | -2.44117 | 0.64520  | 3.70416  |
| N | -2.31945 | -0.76558 | 3.80532  |
| C | -1.53995 | 1.19236  | 2.81402  |
| O | -1.36131 | 2.37356  | 2.54198  |
| C | -1.38889 | -1.15965 | 3.00348  |
| C | -0.96260 | -2.57419 | 2.88633  |
| H | -1.52678 | -3.21007 | 3.57788  |
| H | 0.11297  | -2.66002 | 3.10458  |
| H | -1.10964 | -2.93318 | 1.85588  |
| C | 1.20491  | 0.09719  | 0.96103  |
| H | 1.93197  | -0.73051 | 0.89217  |
| H | 1.74708  | 1.04594  | 0.80765  |
| C | 0.05034  | -0.06586 | 0.02832  |
| C | -1.09549 | -0.14117 | 0.70887  |
| H | -2.10314 | -0.25816 | 0.31618  |

29

VH



G= -762.672957 ha

|   |          |          |          |
|---|----------|----------|----------|
| H | -0.07312 | -0.94015 | 3.08027  |
| O | -0.16548 | -0.16960 | 2.48259  |
| C | 1.79316  | -3.04608 | 3.04178  |
| H | 1.69833  | 7.23541  | 2.19967  |
| C | 1.88422  | 6.38205  | 2.85328  |
| C | 2.35794  | 4.18150  | 4.51710  |
| C | 1.64436  | 5.09314  | 2.37575  |
| C | 2.35158  | 6.58329  | 4.15589  |
| C | 2.58520  | 5.47824  | 4.98027  |
| C | 1.87979  | 3.99032  | 3.21075  |
| H | 1.27866  | 4.93198  | 1.36390  |
| H | 2.53587  | 7.59290  | 4.52453  |
| H | 2.95831  | 5.62120  | 5.99508  |
| H | 2.54803  | 3.32377  | 5.15720  |
| N | 1.63815  | 2.68311  | 2.72683  |
| N | 1.53580  | 2.48821  | 1.32755  |
| C | 1.31554  | 1.54861  | 3.44450  |
| O | 1.20662  | 1.42149  | 4.65700  |
| C | 1.10224  | 0.44076  | 2.37025  |
| C | 1.20735  | 1.26141  | 1.09893  |
| C | 1.00538  | 0.71289  | -0.26259 |
| H | 1.13507  | 1.49539  | -1.01924 |
| H | -0.00412 | 0.28304  | -0.34721 |
| H | 1.71825  | -0.10394 | -0.45488 |
| H | 1.61967  | -3.78835 | 2.25782  |
| H | 1.75029  | -3.38956 | 4.07878  |
| C | 2.06330  | -1.79917 | 2.75057  |
| C | 2.26467  | -0.53761 | 2.46335  |
| H | 3.26878  | -0.13098 | 2.31580  |

30

VI

G= -763.416010 ha

|   |           |           |          |
|---|-----------|-----------|----------|
| H | 1.252085  | 0.696785  | 0.672169 |
| C | 0.744550  | 0.365786  | 1.580550 |
| C | -0.554139 | -0.507336 | 3.897664 |
| C | 0.754256  | -0.989850 | 1.906889 |
| C | 0.089569  | 1.297632  | 2.394791 |
| C | -0.554861 | 0.844901  | 3.551417 |
| C | 0.103052  | -1.446124 | 3.073094 |
| H | 1.259191  | -1.715531 | 1.273130 |
| H | 0.082574  | 2.356605  | 2.132131 |
| H | -1.067487 | 1.555444  | 4.203201 |
| H | -1.052476 | -0.864980 | 4.795493 |
| N | 0.122775  | -2.806560 | 3.391092 |

|   |           |           |          |
|---|-----------|-----------|----------|
| N | 0.886815  | -3.673136 | 2.608519 |
| C | 0.680872  | -4.890569 | 3.138504 |
| C | 1.352483  | -6.093571 | 2.559109 |
| H | 1.949591  | -6.623935 | 3.317220 |
| H | 2.017667  | -5.795190 | 1.737307 |
| H | 0.617799  | -6.814861 | 2.167986 |
| C | -0.207493 | -4.840049 | 4.224672 |
| C | -0.599243 | -3.491187 | 4.419742 |
| O | -1.381467 | -2.957257 | 5.264781 |
| O | -0.671072 | -5.923450 | 4.959048 |
| C | -0.219554 | -5.905351 | 6.319846 |
| H | 0.888655  | -5.904885 | 6.343930 |
| H | -0.548690 | -4.967898 | 6.807334 |
| C | -0.742787 | -7.082466 | 7.074101 |
| H | -0.409570 | -7.130372 | 8.116144 |
| C | -1.550526 | -8.028107 | 6.583521 |
| H | -1.890167 | -8.857678 | 7.205440 |
| H | -1.895481 | -7.997729 | 5.549384 |

30

TS1A

G= -763.325014 ha (+57.1 kcal/mol with respect to VI)

|   |           |           |           |
|---|-----------|-----------|-----------|
| C | 0.272458  | 0.417396  | 1.692227  |
| C | -0.201316 | 0.572455  | -0.189815 |
| H | -4.940098 | -0.488821 | 5.909026  |
| C | -4.365894 | 0.293996  | 5.409637  |
| C | -2.880252 | 2.278365  | 4.115979  |
| C | -3.292609 | -0.068088 | 4.596629  |
| C | -4.712443 | 1.638862  | 5.587546  |
| C | -3.959518 | 2.619505  | 4.933020  |
| C | -2.533593 | 0.921803  | 3.936702  |
| H | -3.024365 | -1.112949 | 4.456471  |
| H | -5.554624 | 1.916527  | 6.223096  |
| H | -4.212893 | 3.674507  | 5.057898  |
| H | -2.290846 | 3.037570  | 3.608287  |
| N | -1.460836 | 0.545070  | 3.122810  |
| N | -1.144069 | -0.812865 | 3.012561  |
| C | -0.074237 | -0.864785 | 2.210836  |
| C | 0.561663  | -2.169117 | 1.868656  |
| H | 0.388428  | -2.436441 | 0.814075  |
| H | 0.160350  | -2.969010 | 2.505326  |
| H | 1.653635  | -2.118843 | 2.002356  |
| C | -0.566491 | 1.366344  | 2.388174  |
| O | -0.590004 | 2.628385  | 2.329452  |
| O | 1.367643  | 0.752960  | 0.887074  |
| H | -1.230901 | 0.234587  | 0.025670  |
| H | -0.204593 | 1.652459  | -0.359463 |

|   |           |           |           |
|---|-----------|-----------|-----------|
| C | 0.337856  | -0.246867 | -1.298490 |
| H | -0.433964 | -0.454053 | -2.054554 |
| C | 1.559352  | -0.764524 | -1.461575 |
| H | 1.794053  | -1.363172 | -2.343193 |
| H | 2.322069  | -0.621217 | -0.698077 |

28

VII

G= -763.413778 ha (+1.4 kcal/mol with respect to VI)

|   |           |           |           |
|---|-----------|-----------|-----------|
| O | -0.090603 | -0.000310 | -0.886142 |
| C | -0.065071 | -0.106927 | 2.818847  |
| H | 4.881680  | 2.211466  | -6.143787 |
| C | 4.141976  | 2.606528  | -5.428938 |
| C | 2.252738  | 3.593440  | -3.593871 |
| C | 3.683006  | 1.777963  | -4.395018 |
| C | 3.671829  | 3.926083  | -5.559529 |
| C | 2.727189  | 4.406260  | -4.634228 |
| C | 2.731445  | 2.264749  | -3.464256 |
| H | 4.042657  | 0.747189  | -4.288055 |
| H | 4.036508  | 4.571933  | -6.372881 |
| H | 2.344468  | 5.435356  | -4.721301 |
| H | 1.520734  | 3.964682  | -2.866655 |
| N | 2.282678  | 1.427886  | -2.427673 |
| N | 2.658324  | 0.060091  | -2.457381 |
| C | 1.461951  | 1.737173  | -1.334294 |
| O | 0.988545  | 2.844845  | -1.071572 |
| C | 1.169349  | 0.375469  | -0.619040 |
| C | 2.128971  | -0.521189 | -1.422721 |
| C | 2.247329  | -1.982161 | -1.167955 |
| H | 2.711598  | -2.518645 | -2.018201 |
| H | 1.221354  | -2.367464 | -0.990798 |
| H | 2.835769  | -2.178962 | -0.246153 |
| H | -0.159351 | -1.133323 | 3.218196  |
| H | -0.714753 | 0.664239  | 3.271940  |
| C | 0.785567  | 0.185261  | 1.852069  |
| C | 1.605414  | 0.468819  | 0.859516  |
| H | 2.644673  | 0.791019  | 1.065930  |

30

TS2A

G= -763.390193 ha (+16.2 kcal/mol with respect to VI)

|   |          |           |          |
|---|----------|-----------|----------|
| C | 0.129149 | 0.184074  | 2.407852 |
| C | 0.238502 | 0.121798  | 0.291152 |
| H | 5.200464 | -3.904687 | 4.265310 |
| C | 4.998902 | -2.900585 | 3.887354 |
| C | 4.457286 | -0.333636 | 2.920581 |

|   |           |           |           |
|---|-----------|-----------|-----------|
| C | 3.679511  | -2.519130 | 3.645984  |
| C | 6.056894  | -2.013729 | 3.656982  |
| C | 5.770769  | -0.733162 | 3.171494  |
| C | 3.392532  | -1.227048 | 3.160540  |
| H | 2.856372  | -3.207670 | 3.824829  |
| H | 7.086566  | -2.316672 | 3.851710  |
| H | 6.582252  | -0.028713 | 2.978139  |
| H | 4.232838  | 0.660646  | 2.543267  |
| N | 2.066077  | -0.855252 | 2.913197  |
| N | 1.058547  | -1.826670 | 3.009528  |
| C | -0.076960 | -1.194976 | 2.746384  |
| C | -1.381393 | -1.914044 | 2.748716  |
| H | -2.089924 | -1.440463 | 3.445112  |
| H | -1.245791 | -2.964727 | 3.036644  |
| H | -1.848290 | -1.880117 | 1.749717  |
| C | 1.542988  | 0.431217  | 2.627798  |
| O | 2.195455  | 1.496737  | 2.558233  |
| O | -0.817619 | 1.158826  | 2.502329  |
| C | -1.366726 | 1.624413  | 1.058005  |
| H | -2.220779 | 0.951890  | 0.897653  |
| H | -1.696910 | 2.655308  | 1.222534  |
| C | -0.238441 | 1.416013  | 0.171068  |
| H | 0.483619  | 2.232999  | 0.073986  |
| H | 1.251729  | -0.148333 | -0.018323 |
| H | -0.468522 | -0.712355 | 0.282594  |

33

VI-Me

G= -802.724276 ha

|   |                   |                   |                   |
|---|-------------------|-------------------|-------------------|
| H | -1.55898658801072 | 2.16433949789991  | 1.31695245640064  |
| C | -0.80276008041154 | 1.37891812808605  | 1.38616758240646  |
| C | 1.11131474596592  | -0.63988116077909 | 1.58196889090431  |
| C | -0.93818419348374 | 0.39907614110209  | 2.37097312115010  |
| C | 0.27490815325077  | 1.36684370672043  | 0.49380522618116  |
| C | 1.22674740820723  | 0.34594577898979  | 0.60312866544823  |
| C | 0.02417247225473  | -0.62779470315685 | 2.48198209283865  |
| H | -1.77528443060813 | 0.40325087482434  | 3.06588779465718  |
| H | 0.37157211451655  | 2.13731222497982  | -0.27291679264746 |
| H | 2.07718140233510  | 0.31620450264468  | -0.08178030570320 |
| H | 1.85168528390628  | -1.43256936997341 | 1.66877479727216  |
| N | -0.08025285680931 | -1.62540982987819 | 3.45380489697863  |
| N | 0.84940575941368  | -2.66615243489344 | 3.45452768731411  |
| C | 0.50311614984119  | -3.43861338686904 | 4.49768729412763  |
| C | 1.28066724496725  | -4.67393221483797 | 4.81865708878678  |
| H | 2.06093173891339  | -4.83590147750548 | 4.06275019586467  |
| H | 0.62943624254490  | -5.56113099310289 | 4.84646860554112  |
| H | 1.76429679964647  | -4.60066222170792 | 5.80552065753098  |

|   |                   |                   |                   |
|---|-------------------|-------------------|-------------------|
| C | -1.01830834879561 | -1.72912778444533 | 4.53005350209871  |
| O | -1.96123242610106 | -0.91629221822187 | 4.77845290514149  |
| C | -0.60776430074351 | -2.91978686152050 | 5.18205391010099  |
| O | -1.18860754738744 | -3.44950578669266 | 6.32588747432615  |
| C | -2.51250659089876 | -3.95613359959916 | 6.09311887934444  |
| H | -2.47754177382587 | -4.71113452536324 | 5.28186194846684  |
| H | -3.16115962764980 | -3.13447062893659 | 5.73371295085732  |
| C | -3.08103145583651 | -4.56240153668765 | 7.33487160672294  |
| H | -4.08735511002210 | -4.98015411129748 | 7.21436498676526  |
| C | -2.47327696974845 | -4.62710126050059 | 8.52537114183570  |
| H | -1.46993933300884 | -4.20202792160812 | 8.62154385938210  |
| C | -3.06704799619592 | -5.24619409545737 | 9.75551048833471  |
| H | -3.14153275317523 | -4.51164128174986 | 10.57470672610692 |
| H | -2.43467987719201 | -6.06730624845893 | 10.13171866464056 |
| H | -4.07198325585883 | -5.64756520200337 | 9.56241100082364  |

33

7

G= -802.719798 ha

|   |                   |                   |                  |
|---|-------------------|-------------------|------------------|
| H | -1.27666523785814 | 2.35545511524356  | 4.12848672492430 |
| C | -0.77099225443080 | 1.47290901302424  | 3.73288099429206 |
| C | 0.50872751596271  | -0.79957601042052 | 2.73845432981251 |
| C | -0.99007004261126 | 0.23898878691977  | 4.34724212945657 |
| C | 0.07656735309722  | 1.58912389667524  | 2.62633654312114 |
| C | 0.71070220782361  | 0.44268890574351  | 2.13647350443022 |
| C | -0.34609454545623 | -0.91341352731943 | 3.85253977513899 |
| H | -1.64737297494041 | 0.15183331703521  | 5.20809308484421 |
| H | 0.23952357863616  | 2.55775806855331  | 2.15247913468083 |
| H | 1.37372411314547  | 0.51131725900291  | 1.27197037577306 |
| H | 1.00223313112533  | -1.69016873370708 | 2.35726875007277 |
| N | -0.54073717840513 | -2.16744963676782 | 4.45429642796723 |
| N | 0.01461425784626  | -3.31474805821119 | 3.81476645660564 |
| C | -0.29168010169611 | -4.35251105459345 | 4.52712796039988 |
| C | 0.10516443797434  | -5.71843225471769 | 4.09649227917097 |
| H | 0.48209865886735  | -5.71748385751292 | 3.06516543597356 |
| H | -0.76465919328977 | -6.38571436464842 | 4.17733804848617 |
| H | 0.88499814187181  | -6.12500244891172 | 4.75923996953202 |
| C | -1.24237294694270 | -2.50359104494830 | 5.60513053912960 |
| O | -1.81974588550680 | -1.71950434136690 | 6.36364633094052 |
| C | -1.20578330864742 | -4.05012603097328 | 5.70963383603868 |
| O | -2.44511436800095 | -4.56013973281528 | 5.48399570050839 |
| C | -0.57628925271951 | -4.40517971486040 | 7.11087191027229 |
| H | 0.39385563256460  | -3.88974337306081 | 7.21407184554719 |
| C | -0.42931163723201 | -5.87132508484200 | 7.34710293655419 |
| H | 0.53117225101798  | -6.32767665225910 | 7.08036431061097 |
| C | -1.41120338255784 | -6.67123568929260 | 7.78978007767653 |
| H | -2.37494018978707 | -6.21751102794920 | 8.04670590192788 |

|   |                   |                   |                  |
|---|-------------------|-------------------|------------------|
| H | -1.27301669505231 | -3.95520787176149 | 7.83707147510030 |
| C | -1.30140993132096 | -8.15766388760961 | 7.94998504976632 |
| H | -0.29541966464146 | -8.51595807599489 | 7.68633385937746 |
| H | -2.02835840785647 | -8.68257868415939 | 7.30818480447278 |
| H | -1.51914408097951 | -8.47213320349424 | 8.98446949739477 |

33

8

G= -802.712573 ha

|   |                   |                   |                  |
|---|-------------------|-------------------|------------------|
| H | -0.72406279446374 | 2.29989604564422  | 4.45353031572029 |
| C | -0.34843325105823 | 1.37763127939175  | 4.00744027044281 |
| C | 0.60611315090503  | -0.99623123356846 | 2.89152702124084 |
| C | -0.80692244194190 | 0.15499346781916  | 4.49929514272748 |
| C | 0.58178738211230  | 1.43180915504130  | 2.96450181860417 |
| C | 1.05555473512814  | 0.23583546026953  | 2.41601201796939 |
| C | -0.33436498304798 | -1.04704572309301 | 3.93738586386972 |
| H | -1.52975569175515 | 0.11861786368002  | 5.30996753573357 |
| H | 0.93498808238419  | 2.39192462699388  | 2.58712493896020 |
| H | 1.78388685356617  | 0.25738128366450  | 1.60295444867769 |
| H | 0.97548891097604  | -1.92624576761954 | 2.46611907648566 |
| N | -0.77674727819222 | -2.29097680328933 | 4.42189391945599 |
| N | -0.14733109528134 | -3.46730591762122 | 3.92365379312207 |
| C | -0.73815688817683 | -4.48698766327186 | 4.46119641155641 |
| C | -0.42611754172268 | -5.87120098538718 | 4.02331558964503 |
| H | 0.32080654825194  | -5.87354527562649 | 3.21847094333624 |
| H | -1.35812650040784 | -6.33700264640535 | 3.66737833419964 |
| H | -0.07181573009847 | -6.48853399253685 | 4.86074849289980 |
| C | -1.90367024033157 | -2.58930797875797 | 5.18343244706793 |
| O | -2.74010945563560 | -1.77673548873788 | 5.57919766021273 |
| C | -1.86114263220294 | -4.12940831369527 | 5.42958624731436 |
| O | -2.99810494351760 | -4.79989009248850 | 5.30993455322621 |
| C | -1.19360283945629 | -4.17015220234404 | 6.97514765287425 |
| H | -0.41576474462099 | -3.38781894541362 | 7.00093540416267 |
| C | -0.54139457011716 | -5.48685620544170 | 7.22180972870897 |
| H | 0.48078327094918  | -5.58914032764889 | 6.84189608350255 |
| C | -1.10484441862366 | -6.54852171881755 | 7.81977333323111 |
| H | -0.56217239249259 | -7.49006933589986 | 7.92669052359931 |
| H | -2.11739445993107 | -6.51403959721116 | 8.22441161346975 |
| C | -2.31746058706627 | -3.84516141659883 | 7.95161030213948 |
| H | -1.97902000527422 | -3.97006260416825 | 8.99103406020564 |
| H | -3.16574455312257 | -4.52000828026107 | 7.76953826366848 |
| H | -2.67414889573403 | -2.81684066660024 | 7.81448619196917 |

35

1h

G= -840.550118 ha

|   |                   |                   |                   |
|---|-------------------|-------------------|-------------------|
| C | -0.36683938387973 | -0.00250369041925 | 0.75585988440317  |
| C | -0.77445316025040 | 0.87647403178022  | -0.42232813458128 |
| H | -0.56121014647901 | 1.93267056199507  | -0.20910036884390 |
| H | -1.85230770356959 | 0.76653939303530  | -0.60225804664416 |
| H | -0.23558147388464 | 0.58049051028862  | -1.33209222396008 |
| C | -1.07513814937638 | 0.42746021016888  | 2.03520782466126  |
| H | -0.86460221896323 | 1.48255096069876  | 2.25742604603945  |
| H | -0.77070407728497 | -0.18714962279149 | 2.89044782875365  |
| H | -2.15934297156445 | 0.31425259593140  | 1.89279344002907  |
| C | -0.56692816826938 | -1.47793952302286 | 0.42661806921481  |
| H | 0.08792126285748  | -1.78307056704262 | -0.40075695693909 |
| H | -1.60913716078304 | -1.62828877768499 | 0.11312162926759  |
| H | -0.38313653674155 | -2.12704152756616 | 1.28959905529300  |
| O | 1.10900858577124  | 0.31604941631441  | 0.86787325047497  |
| C | 1.97748795087023  | -0.23277942058136 | 1.71186829639017  |
| O | 3.14451772940379  | 0.12318303329320  | 1.74099148730041  |
| N | 1.46311351345728  | -1.14677279890399 | 2.68734876121515  |
| N | 1.97271927879493  | -2.29969558839828 | 2.62676088516907  |
| C | 1.52207102697070  | -3.17380728428113 | 3.64992270247893  |
| C | 2.09300442565249  | -4.40068654780205 | 3.55804816384436  |
| H | 2.81717911636946  | -4.55599241229598 | 2.75568749540846  |
| C | 0.54981992846597  | -2.70102942273340 | 4.67587145150085  |
| H | 0.91693996043653  | -1.77410048245212 | 5.13849680077318  |
| H | 0.37926409185324  | -3.46329061969722 | 5.44090071182018  |
| H | -0.41229258575170 | -2.45663382017451 | 4.20105392866430  |
| C | 1.79119413367283  | -5.54188341539655 | 4.45324498133393  |
| O | 0.65819510207365  | -5.83761236288420 | 4.81099556461858  |
| O | 2.82410967645834  | -6.31252757378173 | 4.85065536046366  |
| C | 4.20284652316046  | -5.91960160795829 | 4.53039925027061  |
| H | 4.37042982805132  | -6.09485856204771 | 3.45788744799895  |
| H | 4.32382842693646  | -4.84869517084389 | 4.74733634521109  |
| C | 5.11995403893073  | -6.76742009772694 | 5.38148893408735  |
| H | 4.97565002473203  | -7.83622710448162 | 5.16995098166100  |
| H | 4.94282453397144  | -6.58720804478547 | 6.45101534108290  |
| H | 6.16359457790745  | -6.50785466775207 | 5.15366381153839  |

35

1h-int

G= -878.213701 ha

|   |                   |                   |                   |
|---|-------------------|-------------------|-------------------|
| C | -1.15233942405636 | -0.03564057800865 | 0.89005682441516  |
| C | -1.61371527396110 | 0.96125793768426  | 1.95199564345513  |
| H | -2.20731751377998 | 0.45475604005130  | 2.72571207859820  |
| H | -2.23432053615127 | 1.73970655043322  | 1.48663028293910  |
| H | -0.74924921375039 | 1.43944259592477  | 2.43140983176436  |
| C | -2.35154128700430 | -0.76223972397446 | 0.28056248394518  |
| H | -2.89663753234270 | -1.31381655456806 | 1.05998090158259  |
| H | -2.03963562582081 | -1.46290272262977 | -0.50127453108656 |

|   |                   |                   |                   |
|---|-------------------|-------------------|-------------------|
| H | -3.03605694003407 | -0.02140282821145 | -0.15720680078588 |
| C | -0.28918048200389 | 0.65881842995979  | -0.16312346364187 |
| H | 0.58122440369258  | 1.13480831417271  | 0.30956004332979  |
| H | -0.88261626526581 | 1.44168601645189  | -0.65723405177188 |
| H | 0.05871431193955  | -0.05117901563876 | -0.92093790604145 |
| O | -0.32818230685474 | -0.97768234327474 | 1.68498369059023  |
| C | 0.26314921886173  | -2.03813652468722 | 1.09680044500252  |
| O | 0.18050647000530  | -2.34516023825750 | -0.08860848287410 |
| N | 1.58902148385768  | -3.95470289592361 | 1.57726357623752  |
| N | 0.99067114133827  | -2.76848323672791 | 2.02677780011690  |
| C | 2.19976719494935  | -4.45180463177027 | 2.65974704648708  |
| C | 2.93544661424740  | -5.74937686914153 | 2.58118094891491  |
| H | 3.99757139911959  | -5.62609244281004 | 2.84339660378576  |
| H | 2.87060991187174  | -6.16155268042758 | 1.56483746026290  |
| H | 2.51271878009263  | -6.48145293893228 | 3.28635209273736  |
| C | 2.05621970440855  | -3.62276567467921 | 3.78705679453188  |
| O | 2.59588870098221  | -3.84491393996413 | 5.04539875880810  |
| C | 1.57450436169651  | -4.09750175540110 | 6.06389665797885  |
| H | 0.83180190210394  | -3.28443560262647 | 6.02953597897998  |
| H | 2.11792183148498  | -4.05517382769220 | 7.01853817895001  |
| C | 0.92934666554764  | -5.42918402319406 | 5.85150684040842  |
| H | 1.54756212804936  | -6.31002429298094 | 6.05380182004580  |
| C | -0.30657445572222 | -5.57341031669747 | 5.36112187020871  |
| H | -0.73954242753247 | -6.55639121388551 | 5.16522510801790  |
| C | 1.26378396756173  | -2.50514691607405 | 3.43529664521388  |
| O | 0.86033049506133  | -1.51918644651469 | 4.10361840984160  |
| H | -0.92733042148901 | -4.70161205678409 | 5.13794470424331  |

35

9

G= -878.215454 ha (-1.1 kcal/mol with respect to 1h-int)

|   |                   |                   |                   |
|---|-------------------|-------------------|-------------------|
| C | -0.96503340705233 | 0.22212735306732  | 0.66230890590788  |
| C | -1.17333808465908 | 1.45337299946590  | 1.54054053507226  |
| H | -1.82915618866398 | 1.21692113902868  | 2.38881516616132  |
| H | -1.63880991962292 | 2.25249107391357  | 0.94770210043271  |
| H | -0.21270990404407 | 1.81855673761351  | 1.92834018381601  |
| C | -2.30235895384318 | -0.32573436871007 | 0.16762495537725  |
| H | -2.94978971956559 | -0.58164327963106 | 1.01810539086704  |
| H | -2.16314507341395 | -1.21308992215157 | -0.45942572521006 |
| H | -2.80612771911871 | 0.45048172681010  | -0.42651600697063 |
| C | 0.00818357042754  | 0.52499692623606  | -0.47580426491041 |
| H | 0.98053636294673  | 0.83856797630328  | -0.07163501508295 |
| H | -0.39423607770873 | 1.35097402534344  | -1.08010500042428 |
| H | 0.15292116390485  | -0.34760216905906 | -1.12211470283365 |
| O | -0.34291051685123 | -0.73968674634215 | 1.61717229289559  |
| C | -0.00404330013379 | -1.97443708302040 | 1.21965770782090  |
| O | -0.11895215061393 | -2.44990919799086 | 0.09910204051697  |



|   |                   |                   |                  |
|---|-------------------|-------------------|------------------|
| N | 1.13381223714480  | -3.94814644642458 | 1.99112165749499 |
| N | 0.53127997196060  | -2.69359540152210 | 2.29657985061125 |
| C | 1.58471953518653  | -4.44622421875467 | 3.09842366061815 |
| C | 2.32195769429652  | -5.73697426922507 | 3.10581874197431 |
| H | 3.27141367818052  | -5.60548487584856 | 3.64515104276282 |
| H | 2.52229692480589  | -6.08595097772001 | 2.08465029310427 |
| H | 1.75068581212924  | -6.50484507084466 | 3.64930748399674 |
| C | 1.43565333252567  | -3.53267380381724 | 4.31043394276931 |
| O | 2.65427435236948  | -3.01025946235519 | 4.64214677328387 |
| C | 0.63908395704777  | -4.15875756730140 | 5.49537229237610 |
| H | -0.32834765563586 | -4.56573467933463 | 5.15519174084584 |
| H | 0.42367920233429  | -3.30320933228739 | 6.16208077158069 |
| C | 1.42124488369043  | -5.19066149643187 | 6.23726357581191 |
| H | 2.45225488708917  | -4.90385841760069 | 6.46758731023900 |
| C | 0.96719326630084  | -6.39395711128920 | 6.60971626339893 |
| H | 1.60107940757667  | -7.10368081647059 | 7.14566651532806 |
| H | -0.05457861109971 | -6.71415527708730 | 6.38641840522793 |
| C | 0.58380906404726  | -2.40236352561518 | 3.67866100663326 |
| O | 0.10137900749780  | -1.42960578491619 | 4.24134609433150 |

38

1h-int-Me

G= -917.522311 ha

|   |                   |                   |                   |
|---|-------------------|-------------------|-------------------|
| C | -1.20558420087816 | -0.11428951110239 | 1.16873026474878  |
| C | -1.41389632742532 | 1.03115720626652  | 2.15835442393398  |
| H | -1.80853508943739 | 0.65015624032337  | 3.10951042818105  |
| H | -2.12951801321267 | 1.75507097958623  | 1.74417062099926  |
| H | -0.46462858809395 | 1.54752514135652  | 2.35610693353503  |
| C | -2.51262847111640 | -0.87452646353279 | 0.94330734297544  |
| H | -2.88492261759254 | -1.28161367730660 | 1.89394844437816  |
| H | -2.37711044856006 | -1.69570658275444 | 0.23119967620006  |
| H | -3.26876324260357 | -0.18157215531605 | 0.54734058419499  |
| C | -0.59554430622356 | 0.40328132188475  | -0.13430060813905 |
| H | 0.36705624196847  | 0.89499206089364  | 0.06539597531400  |
| H | -1.27461986126476 | 1.14605007225546  | -0.57793860101078 |
| H | -0.44033072174524 | -0.41055908334152 | -0.85100437617496 |
| O | -0.23322863515839 | -0.97214439434039 | 1.88778387625387  |
| C | 0.18530900230251  | -2.13586283057814 | 1.34962743661306  |
| O | -0.10888696381933 | -2.56384738768614 | 0.23759585988270  |
| N | 1.53316927354542  | -4.04259170846641 | 1.80512920607392  |
| N | 1.01571064175415  | -2.81101433417714 | 2.23364277026628  |
| C | 2.18646829513347  | -4.52052259377228 | 2.87109354562345  |
| C | 2.87637361511450  | -5.84301647086747 | 2.80063303505706  |
| H | 3.96242359433354  | -5.73666332188681 | 2.94950055879977  |
| H | 2.70199121462212  | -6.31195299847168 | 1.82224887504772  |
| H | 2.50622465588333  | -6.51675169444944 | 3.58800344615288  |
| C | 2.13707914436345  | -3.64306647108529 | 3.97035435465184  |

|   |                   |                   |                  |
|---|-------------------|-------------------|------------------|
| O | 2.67169731140249  | -3.86092903818805 | 5.23077576037220 |
| C | 1.62616971002766  | -4.12913820551492 | 6.23194319097717 |
| H | 0.90991642729103  | -3.29400656689956 | 6.21129616429593 |
| H | 2.15693919529829  | -4.11908422376094 | 7.19346181451390 |
| C | 0.96941810805843  | -5.44991011193448 | 5.98549805674889 |
| H | 1.50937982900824  | -6.32950754829147 | 6.34933509819275 |
| C | -0.15859345963066 | -5.64502730299263 | 5.28037817555368 |
| H | -0.47879558061189 | -6.68225120081027 | 5.12624038732512 |
| C | 1.37262534150535  | -2.50818532311784 | 3.61218667841847 |
| O | 1.02796963897380  | -1.49105733037063 | 4.26763884173159 |
| C | -1.03766806367035 | -4.60947757593039 | 4.65123926134755 |
| H | -0.99040390942212 | -4.69562933848817 | 3.55237765388801 |
| H | -0.74930252225400 | -3.58422638845270 | 4.91136372591542 |
| H | -2.09053727220879 | -4.76780594073700 | 4.93584970060219 |

38

10

G= -917.522454 ha (-0.09 kcal/mo with respect to 1h-int-Me)

|   |                   |                   |                   |
|---|-------------------|-------------------|-------------------|
| C | -0.91922742811442 | 0.34939504877902  | 0.60611919286130  |
| C | -1.12439259857913 | 1.57011504420107  | 1.49973352556806  |
| H | -1.80848455298985 | 1.33362411545863  | 2.32524866692904  |
| H | -1.55509594423449 | 2.38994380782040  | 0.90888472236960  |
| H | -0.16678629555582 | 1.90632694554115  | 1.92002622997963  |
| C | -2.25395129427941 | -0.15738669834567 | 0.06293492043732  |
| H | -2.93197042341056 | -0.41205586928920 | 0.88961663171736  |
| H | -2.11718591496988 | -1.03723541130597 | -0.57517402050190 |
| H | -2.72144457031064 | 0.64068501126882  | -0.53192792371443 |
| C | 0.09322708981938  | 0.64829845157294  | -0.49838817017488 |
| H | 1.05958757641825  | 0.93574422439361  | -0.06143271331448 |
| H | -0.27368010431609 | 1.49089594221344  | -1.10240785746515 |
| H | 0.23880928190746  | -0.21821982211678 | -1.15273847229927 |
| O | -0.34816891898247 | -0.64268735037641 | 1.56053564504903  |
| C | -0.02567072385624 | -1.87854462729882 | 1.15175587713957  |
| O | -0.11783683094108 | -2.33211188778000 | 0.01992272670068  |
| N | 1.05641664337153  | -3.88359597110674 | 1.92236921713781  |
| N | 0.46183192669901  | -2.62621291389731 | 2.23132107251612  |
| C | 1.47678477736420  | -4.40100284695315 | 3.03308472951107  |
| C | 2.19390992732148  | -5.70291922205181 | 3.04022118621748  |
| H | 3.14462973159070  | -5.58807040179456 | 3.58106060260640  |
| H | 2.38982617659315  | -6.05388708778586 | 2.01882251820489  |
| H | 1.60993634239912  | -6.46141689976507 | 3.58350096852194  |
| C | 1.30694441569674  | -3.50337011462205 | 4.25344443247716  |
| O | 2.52034432561290  | -2.98337492596425 | 4.61299722264196  |
| C | 0.48650023389233  | -4.15039410070469 | 5.40977783213028  |
| H | -0.46254381451341 | -4.55688120791921 | 5.02562595617941  |
| H | 0.23260767472088  | -3.30688994301535 | 6.07834944367641  |
| C | 1.27453203661301  | -5.17356563201116 | 6.16043904253044  |

|   |                   |                   |                  |
|---|-------------------|-------------------|------------------|
| H | 2.28954560843905  | -4.85339383477646 | 6.41329625532667 |
| C | 0.88623529231823  | -6.40729686445772 | 6.52207668600300 |
| H | 1.61196982498488  | -7.02825888972592 | 7.05976179177959 |
| C | 0.47737802382251  | -2.35965903755543 | 3.62009584716107 |
| O | -0.01671234244450 | -1.39384891260789 | 4.18534199277483 |
| C | -0.44366709313307 | -7.05400560953376 | 6.26431351449253 |
| H | -0.32293579839429 | -7.97968376837285 | 5.67725845313787 |
| H | -1.13435283905801 | -6.39574467190751 | 5.72103272757018 |
| H | -0.92918377578036 | -7.34819237934648 | 7.20939112453588 |

38

11

G= -917.511633 ha (+6.7 kcal/mol with respect to 1h-int-Me)

|   |                   |                   |                  |
|---|-------------------|-------------------|------------------|
| N | -0.52678884265303 | -3.15487165412564 | 4.61200053455938 |
| N | -0.77992316328174 | -4.45098066392046 | 4.07779034987054 |
| C | -1.56481866691999 | -5.06732435115199 | 4.90286229065780 |
| C | -2.08759507803759 | -6.41937040201024 | 4.56069252930375 |
| H | -2.03653955331315 | -6.59763693464331 | 3.47791587200381 |
| H | -3.12788326349265 | -6.49309120442388 | 4.90527515540244 |
| H | -1.51542301693398 | -7.20826468998332 | 5.07045564240271 |
| C | -1.28692090775701 | -2.89912029186777 | 5.77607507624580 |
| O | -1.34586142125491 | -1.82993997341288 | 6.36357491232930 |
| C | -2.05763914269041 | -4.22458714569934 | 6.08252885995499 |
| O | -3.39297472309581 | -4.05408614559569 | 6.01312292981418 |
| C | -1.49720746133162 | -4.75279790162084 | 7.50223787748927 |
| H | -0.40087569999266 | -4.61417727199390 | 7.47407208609453 |
| C | -1.76565360855565 | -6.21664239955524 | 7.67421069444023 |
| H | -1.05521817158845 | -6.89082154452892 | 7.18481577813543 |
| C | -2.80119590909955 | -6.75784330586513 | 8.33127482576549 |
| H | -2.93702255893682 | -7.84038833590918 | 8.37972988766980 |
| H | -3.54605154371568 | -6.14413019858381 | 8.84081141473391 |
| C | -2.09785614024822 | -3.89538351867146 | 8.61657737609502 |
| H | -1.79677486613530 | -4.27827360771366 | 9.60274920538124 |
| H | -3.19445712417977 | -3.91404314169363 | 8.55050187037158 |
| H | -1.77502076747948 | -2.85162090943979 | 8.52482459294207 |
| C | 0.29818182315776  | -2.25205916799902 | 3.93363065601962 |
| O | 0.51321982730260  | -1.11897060221735 | 4.33920935782232 |
| O | 0.80055806374618  | -2.82159593134931 | 2.82336918316582 |
| C | 1.72801571741207  | -2.05902652386623 | 1.93705355467354 |
| C | 2.01851330687274  | -3.07402880130508 | 0.83368678498579 |
| H | 2.48453708383213  | -3.97659553109302 | 1.25147268638361 |
| H | 2.70598622020510  | -2.63312563053206 | 0.09855974432956 |
| H | 1.09109383917973  | -3.36058310930320 | 0.31916936908936 |
| C | 1.01810575514036  | -0.83105406085944 | 1.36925199956215 |
| H | 0.81027902855639  | -0.09141416303767 | 2.14991548430059 |
| H | 0.07403933433101  | -1.12505515390065 | 0.88996663869665 |
| H | 1.66165946945180  | -0.37027077251873 | 0.60622103198504 |

|   |                  |                   |                  |
|---|------------------|-------------------|------------------|
| C | 3.00201814999025 | -1.70705301956615 | 2.70230204061606 |
| H | 2.80056758225508 | -0.98558176379109 | 3.50125989398106 |
| H | 3.72899384154115 | -1.26752410093559 | 2.00465446575000 |
| H | 3.44793258771914 | -2.61266607531532 | 3.13717734697552 |

27

Diaza-diene

G= -686.465945 ha

|   |                   |                   |                  |
|---|-------------------|-------------------|------------------|
| H | -2.36632425298844 | -2.37996672588868 | 0.69167541815417 |
| C | -1.39586303665126 | -2.23615616120938 | 1.17528309050709 |
| H | -1.15576506403596 | -3.08931902570141 | 1.82266315886574 |
| H | -0.60430258861462 | -2.11015277024779 | 0.42519014733750 |
| O | -1.53680748208065 | -1.03129211506029 | 1.96403879401558 |
| C | -0.43253382726858 | -0.66313247542350 | 2.67226984008549 |
| O | 0.61355323703220  | -1.30312601323627 | 2.64583684480488 |
| C | -0.72600802838565 | 0.56696852290313  | 3.41984053703130 |
| H | -1.72899168581169 | 0.97567502219814  | 3.29234225991290 |
| C | 0.11983920408911  | 1.24131831542230  | 4.24819669774303 |
| C | 1.52987268858734  | 0.87950717015495  | 4.57833792127223 |
| H | 2.20311291663814  | 1.70109154844049  | 4.29261576267839 |
| H | 1.82314184062216  | -0.03904946298690 | 4.06533587963057 |
| H | 1.63850967198310  | 0.75648522644563  | 5.66584517672753 |
| N | -0.47875864802886 | 2.39148635306623  | 4.81086233582618 |
| N | 0.28648486043317  | 3.03438055129686  | 5.59667668428346 |
| C | -0.28066853194765 | 4.19314618377672  | 6.16953222930452 |
| C | -1.19444961058555 | 6.52076671870046  | 7.41730784086913 |
| C | -1.57657284622888 | 4.67507632361661  | 5.89211606412586 |
| C | 0.54915291617360  | 4.88434770339038  | 7.07048916169336 |
| C | 0.09103710142107  | 6.04431321591925  | 7.69396501700468 |
| C | -2.02383072382005 | 5.83368638513950  | 6.51603593990202 |
| H | -2.20683183767948 | 4.13250534761913  | 5.18838363951227 |
| H | 1.54762010948318  | 4.49109983961319  | 7.26557033456842 |
| H | 0.73478377554298  | 6.57828076903576  | 8.39384469891840 |
| H | -3.02405605213582 | 6.21287500787001  | 6.30299336479685 |
| H | -1.55434410574286 | 7.43018454514543  | 7.89975116042829 |

6

MeOH

G= -115.756779 ha

|   |                   |                   |                  |
|---|-------------------|-------------------|------------------|
| H | -0.00014304528359 | -0.00514982763827 | 0.00625498343941 |
| C | 0.00800358013180  | 0.01605500919686  | 1.10395359292386 |
| H | 1.05564744011367  | 0.03642040082710  | 1.44792953380821 |
| H | -0.49609277285317 | 0.93678529370738  | 1.44275097746907 |
| O | -0.67853208384112 | -1.16459749109498 | 1.54762819736836 |
| H | -0.66388311826759 | -1.16351338499809 | 2.52048271499109 |

7

Propargylic alcolate

G= -191.429602 ha

|   |                   |                   |                   |
|---|-------------------|-------------------|-------------------|
| O | -0.00009383191219 | -0.00175811918553 | 0.97724832827981  |
| C | -0.01169564375348 | -0.02048716497663 | -0.38241280320848 |
| H | 1.00937119205655  | -0.01926073724030 | -0.86944025690732 |
| H | -0.52008887815763 | 0.86546951670738  | -0.86871594274148 |
| C | -0.70203608161721 | -1.21317138880107 | -0.96739999699288 |
| H | -1.78552915812690 | -3.09767083089857 | -1.69448044074575 |
| C | -1.28092759848913 | -2.21412127560528 | -1.35679888768391 |

9

Allylic alcolate

G= -192.655382 ha

|   |                   |                   |                   |
|---|-------------------|-------------------|-------------------|
| O | -0.57165317914026 | 0.24285991045188  | 0.80563000623509  |
| C | 0.03788272722894  | -0.02157231301094 | -0.39242548180408 |
| H | 1.15798637747880  | -0.18933595253253 | -0.31382115910902 |
| H | -0.05083924837858 | 0.80572142463001  | -1.15952167436492 |
| C | -0.53323182630853 | -1.26680780584943 | -1.04133536414996 |
| H | -0.45360534828448 | -2.17507039373643 | -0.42799264431983 |
| C | -1.19102426106278 | -1.31565804048199 | -2.20980900773288 |
| H | -1.64213169659521 | -2.23503972944122 | -2.59263775524631 |
| H | -1.30438354493789 | -0.41709710002937 | -2.82608691950808 |

12

Methallylic alcolate

G= -231.965403 ha

|   |                   |                   |                  |
|---|-------------------|-------------------|------------------|
| O | -0.02673067453175 | 0.00207207825840  | 1.30493886147065 |
| C | -1.16694904358875 | -0.40953471176054 | 1.90272665519833 |
| H | -1.51487802658599 | -1.44767208083821 | 1.58826765106370 |
| H | -2.08389142228488 | 0.21837211030711  | 1.65123793203812 |
| C | -1.17808170422865 | -0.46959154925060 | 3.42441175107438 |
| H | -2.11634756379396 | -0.81161029527050 | 3.88928582695002 |
| C | -0.13588953337755 | -0.13779452927144 | 4.19880771100049 |
| H | 0.77064164386534  | 0.19498360339107  | 3.67783560773846 |
| C | -0.10698314245901 | -0.17999851892379 | 5.69957099404976 |
| H | 0.09610975671020  | 0.81490237518692  | 6.13252022626659 |
| H | 0.69101622353190  | -0.84464703899819 | 6.07350899649870 |
| H | -1.06293651325690 | -0.53681144283022 | 6.11234778665080 |

## 7. References

- (1) (a) O. A. Attanasi, P. Filippone, A. Mei, S. Santeusanio, *Synthesis* 1984, 671. (b) O. A. Attanasi, P. Filippone, A. Mei, S. Santeusanio, *Synthesis* 1984, 873. (c) L. Preti, O. A. Attanasi, E. Caselli, G. Favi, C. Ori, P. Davoli, F. Felluga, F. Prati, *Eur. J. Org. Chem.* 2010, 4312.
